# Supplementary material for: Photo-triggered halodecarboxylation of aliphatic carboxylic acids via cerium-mediated ligand-to-metal charge transfer in water
Source: Royal Society of Chemistry journal article supplement (doi:10.1039/d3gc02063k), 2023-01-01

## Supporting Information

### **Photo-triggered Halodecarboxylation of Aliphatic Carboxylic Acids via Cerium-Mediated ligand-to-metal-charge-transfer in water**

Yan Xu, Panyi Huang, Yu Jiang, Chun Lv, Peixuan Li, Jiayang Wang, Bin Sun,\* and Can Jin\*

|                     |                                                           |
|---------------------|-----------------------------------------------------------|
| <b>Page S1</b>      | <b>General Information</b>                                |
| <b>Page S2-S4</b>   | <b>Preparation of Substrate</b>                           |
| <b>Page S5</b>      | <b>General procedure for decarboxylative halogenation</b> |
| <b>Page S6</b>      | <b>Optimization of the reaction conditions</b>            |
| <b>Page S7-S23</b>  | <b>Characterization Data for the products</b>             |
| <b>Page S24-S26</b> | <b>Application of the methodology</b>                     |
| <b>Page S27</b>     | <b>Control experiments</b>                                |
| <b>Page S28-S30</b> | <b>UV-vis experiments</b>                                 |
| <b>Page S31</b>     | <b>Electron paramagnetic resonance (EPR) experiment</b>   |
| <b>Page S32</b>     | <b>KI-starch test</b>                                     |
| <b>Page S33-S89</b> | <b>Copies of NMR Spectra</b>                              |

## I. General Information

$^1\text{H}$  NMR spectra were recorded at 400 MHz using TMS as internal standard,  $^{13}\text{C}$  NMR spectra were recorded at 100 MHz using TMS as internal standard. All chemical shifts were reported as  $\delta$  values (ppm) relative to TMS and observed coupling constants ( $J$ ) are given in Hertz (Hz). Mass spectra were measured with a HRMS-ESI instrument. The UV-Vis measurements were carried out using a UV-Vis spectrophotometer (ULN 2209003, MAPADA P6). The thin layer chromatography (TLC) was performed using glass plates covered with  $\text{SiO}_2$ . Spots were visualized by UV light irradiation or by staining of the TLC plate with iodine. Unless otherwise indicated, all reactions were carried out under air atmosphere at room temperature with magnetic stirring. All reagents were purchased from commercial source and without prior purification. Column chromatography was performed on silica gel (200-300 mesh) and the elution was performed with *n*-hexane/ethyl acetate.

The Material of the Irradiation Vessel

Manufacturer : Shenzhen Kelo Light Co., Ltd.

Model : Kelo A0100

Distance from the light source to the irradiation vessel : 2.0 cm

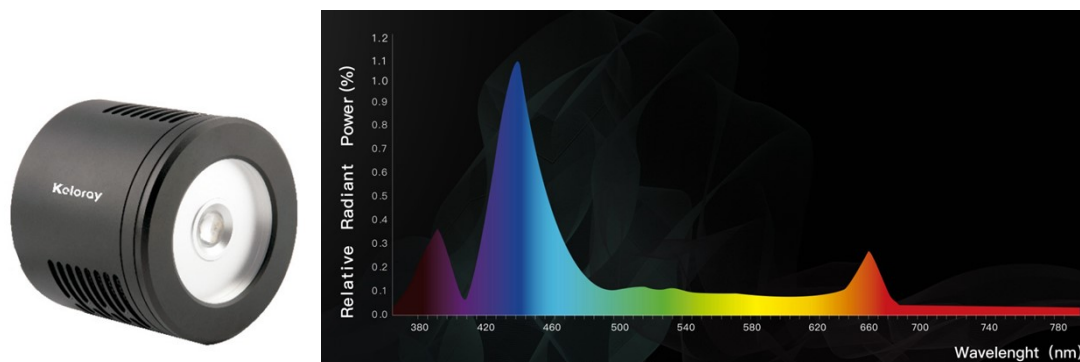

Figure S1. light setup and Broadband source.

## II. Preparation of substrate

### General procedure for the synthesis of N-phthalimide carboxylic acid derivatives<sup>1</sup>

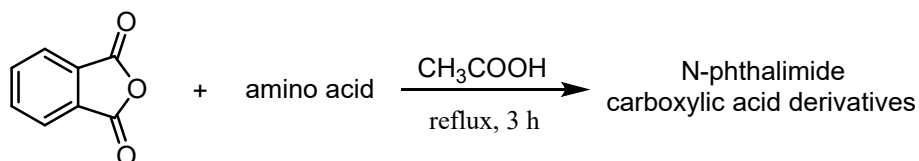

Reflux a solution of phthalic anhydride derivative (5 mmol) and amino acid (5 mmol) in acetic acid (20 mL) for 3 hours. Cool the reaction mixture to room temperature and then pour into ice water (50 mL). Stir the reaction mixture for 15 minutes. After that, a white crystalline product is obtained, filter the reaction mixture. Dry the reaction mixture in high vacuo to obtain the corresponding product.

### General procedure for the synthesis of N-sulfoylpiperidinic acid derivatives<sup>2</sup>

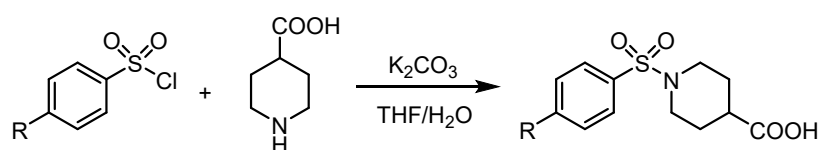

Piperidine 4-carboxylic acid (646 mg, 5.00 mmol, 1.0 eq) was stirred with potassium carbonate (970 mg, 7.0 mmol, 1.4 eq) in water (5 mL) at room temperature until a clear solution was obtained. Solution of benzene sulfonyl chloride (6.5 mmol, 1.3 equiv) in THF (5 mL) was added with the aid of a dropping funnel within 15 min. After stirring for 15 min, the cooling bath was removed and the reaction mixture was stirred for 24 h. After that, the reaction mixture was diluted with EtOAc (20 mL) and 2 N HCl (20 mL). Then, poured into an extraction funnel, the organic phase was washed with brine (1 x 20 mL), dried over  $\text{Na}_2\text{SO}_4$  and concentrated under reduced pressure. Dry the residues in high vacuo to obtain the corresponding product.

### General procedure for the synthesis of lithocholic acid derivative<sup>3</sup>

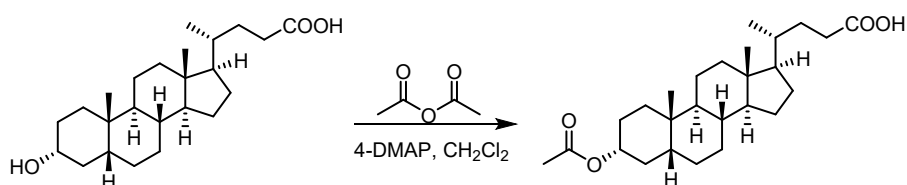

Add acetic anhydride (26.43 mmol, 2.5 mL) dropwise to a solution of lithocholic (7.34 mmol, 2.764g) and 4,4-dimethylaminopyridine (1.47 mmol, 180 mg) in  $\text{CH}_2\text{Cl}_2$  (30 mL). Stir the reaction mixture at room temperature under nitrogen atmosphere for 1 h. Wash the mixture with HCl 1 N aqueous solution (3×30 mL), 5%  $\text{NaHCO}_3$  solution (3×30 mL), saturated NaCl solution (3×20 mL) and water (1×20 mL). Dry the organic layer over  $\text{Na}_2\text{SO}_4$  and concentrate. Purify the crude product by column chromatography (silica gel, cyclohexane/ethyl acetate, 8:2) to obtain lithocholic acid derivative.

#### General procedure for the synthesis of hyodeoxycholic acid derivative.<sup>4</sup>

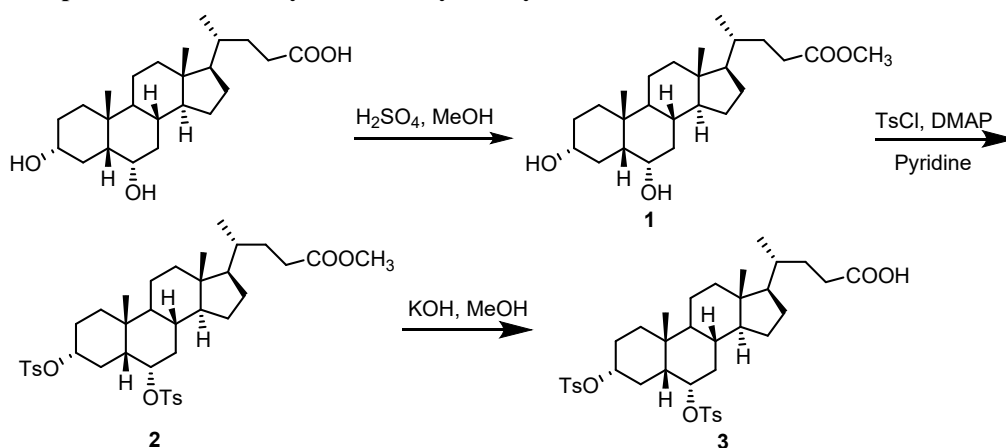

Hyodeoxycholic acid (20.0g, 51mmol, 1 equiv.) was added into methanol (100 mL) and stirred at room temperature for 5 min. After all dissolved, sulfuric acid (2.5 mL) was slowly added into the reaction solution and the reaction was carried out for 18 hours at room temperature under nitrogen atmosphere. The mixture was concentrated to obtain yellow oil, which was extracted by ethyl acetate. After that, saturated  $\text{NaHCO}_3$  solution was added to adjust the pH to neutral and washed combined organic layers with brine. The organic phase was concentrated to obtain **1** (20.7g, 99%).

**1** (10.2g, 25 mmol, 1 equiv.),  $\text{TsCl}$  (14.1g, 75 mmol, 3 equiv.),  $\text{DMAP}$  (0.305 g, 2.5 mmol, 0.1 equiv.) were dissolved in pyridine (50 mL). The mixture was placed in an ice bath and stirred for 48 hours under nitrogen atmosphere. Subsequently, 250 mL 10 %  $\text{HCl}$  was added to the solution and then the white solid was precipitated, filtered under reduced pressure. The filter cake was washed with 5%  $\text{HCl}$  to neutral, and dried to obtain **2** (17.85 g, 99%).

**2** (7.1g, 10 mmol, 1 equiv.),  $\text{KOH}$  (0.729g, 13 mmol, 1.3 equiv.) was dissolved in  $\text{MeOH}$  (50 mL). The mixture was stirred for 16 h at room temperature. Concentrated under reduced pressure. The mixture was purified by silica gel column to obtain **3** (6.8g, 98%).

**General procedure for the synthesis of 2,2-dimethyl-4-phenylbutanoic acid.<sup>5</sup>**

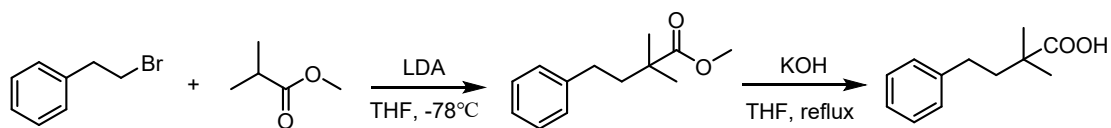

Methyl isobutyrate (10 mmol) and THF (20 mL) was added into an oven-dried 100 mL round-bottom flask and stirred at room temperature for 5 min. Submerge the flask in an acetone/dry ice bath (-78 °C) and stir the mixture vigorously for 5 minutes. Add LDA solution (20 ml, 0.5 M in THF, 10 mmol) dropwise to the mixture. Stir the mixture for 1 hours at -78 °C. Then, add corresponding halide (12 mmol) in THF (10 mL) dropwise to the mixture for 10 minutes. Remove the ice bath after stirring at -78 °C for 1 hour. Allow the mixture to stir for 8 hours at room temperature. After that, the reaction mixture was diluted with EtOAc and 1 M HCl (aq.). Dry the organic layer over Na<sub>2</sub>SO<sub>4</sub> and concentrate. Purify the crude product by column chromatography (silica gel, cyclohexane/ethyl acetate, 100:1) to obtain the ester (1.833 g, 89%).

Add a KOH solution (2.0 M in H<sub>2</sub>O, 4.0 equiv.) to a solution of the alkylated ester (1.833g, 1.0 equiv.) in THF (0.2 M) at room temperature for 12 h. After washing the aqueous phase with DCM twice, adjust the pH to 1-2 with 4 N HCl. Extract the aqueous layer with DCM. Dry the combined organic layers over Na<sub>2</sub>SO<sub>4</sub> and concentrate under reduced pressure to obtain 2,2-dimethyl-4-phenylbutanoic acid (1.505 g, 88 %).

### III. General procedure for decarboxylative halogenation

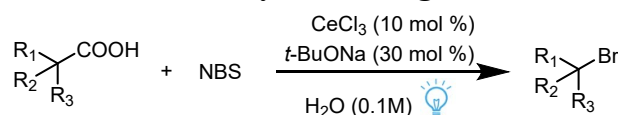

**Procedure A:** To a dried 8 mL vial was added acid (0.3 mmol), 1-bromopyrrolidine-2,5-dione (NBS) (1.0-1.5 equiv.), CeCl<sub>3</sub> (10 mol %), *t*-BuONa (30 mol %) in 3 mL H<sub>2</sub>O under air atmosphere. The resulting solution was stirred under 100 W blue light for 6-12 h (25 °C). After that, the reaction mixture was diluted with DCM. Then, poured into an extraction funnel, the organic phase was dried over Na<sub>2</sub>SO<sub>4</sub> and concentrated under reduced pressure. Purification by flash column chromatography with PE/EA as an eluent gave the product.

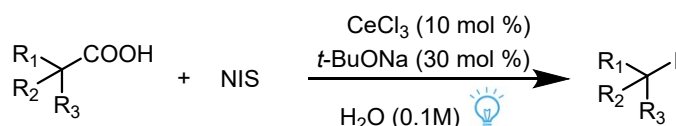

**Procedure B:** To a dried 8 mL vial was added acid (0.3 mmol), 1-iodopyrrolidine-2,5-dione (NIS) (1.5 equiv.), CeCl<sub>3</sub> (10 mol %), *t*-BuONa (30 mol %) in 3 mL H<sub>2</sub>O under air atmosphere. The resulting solution was stirred under 100 W blue light for 12 h (25 °C). After that, the reaction mixture was diluted with DCM. Then, poured into an extraction funnel, the organic phase was dried over Na<sub>2</sub>SO<sub>4</sub> and concentrated under reduced pressure. Purification by flash column chromatography with PE/EA as an eluent gave the product.

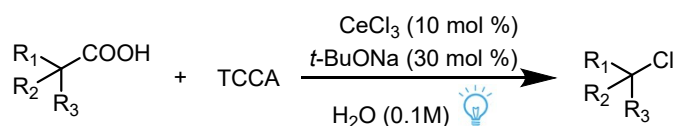

**Procedure C:** To a dried 8 mL vial was added acid (0.3 mmol), 1,3,5-trichloro-1,3,5-triazinane-2,4,6-trione (TCCA) (0.5 equiv.), CeCl<sub>3</sub> (10 mol %), *t*-BuONa (30 mol %) in 3 mL H<sub>2</sub>O under air atmosphere. The resulting solution was stirred under 100 W blue light for 12 h (25 °C). After that, the reaction mixture was diluted with DCM. Then, poured into an extraction funnel, the organic phase was dried over Na<sub>2</sub>SO<sub>4</sub> and concentrated under reduced pressure. Purification by flash column chromatography with PE/EA as an eluent gave the product.

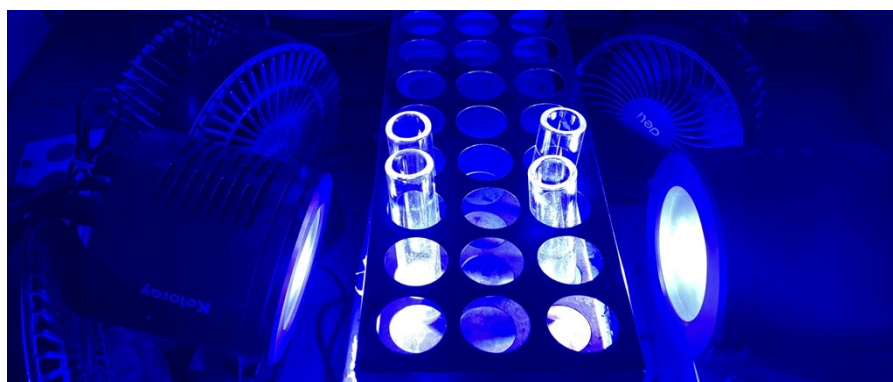

**Figure S2.** 100 W blue LED light setup.

## IV. Optimization of the reaction conditions

**Table S1.** Photocatalyst and base screening

| Entry | Deviation from standard conditions <sup>a</sup> | Yield <sup>b</sup> (%) |
|-------|-------------------------------------------------|------------------------|
| 1     | None                                            | 85                     |
| 2     | CeBr <sub>3</sub> as PC                         | 65                     |
| 3     | Ce (SO <sub>4</sub> ) <sub>2</sub> as PC        | 32                     |
| 4     | 5 mol % of CeCl <sub>3</sub>                    | 81                     |
| 5     | 20 mol % of CeCl <sub>3</sub>                   | 84                     |
| 6     | CH <sub>3</sub> ONa as base                     | 46                     |
| 7     | K <sub>2</sub> CO <sub>3</sub> as base          | 63                     |
| 8     | Cs <sub>2</sub> CO <sub>3</sub> as base         | 32                     |
| 9     | 10 mol % of <i>t</i> - BuONa                    | 78                     |
| 10    | 30 mol % of <i>t</i> - BuONa                    | 82                     |
| 11    | 1.0 equiv of <i>t</i> - BuONa                   | 80                     |
| 12    | No base                                         | trace                  |

<sup>a</sup> Conditions: 3-Phthalimidopropionic acid (1) (0.2 mmol), NBS (1.5 equiv.), CeCl<sub>3</sub> (10 mol%), *t*-BuONa (30 mol %), H<sub>2</sub>O (2 mL), room temperature, air atmosphere, 100W Blue LEDs, 12 h. <sup>b</sup> Determined by <sup>1</sup>HNMR spectroscopy using 1,3,5-trimethoxybenzene as internal standard.

**Table S2.** Other parameter screening

| Entry | Deviation from standard conditions <sup>a</sup> | Yield <sup>b</sup> (%) |
|-------|-------------------------------------------------|------------------------|
| 1     | None                                            | 85                     |
| 2     | CH <sub>3</sub> CN as solvent                   | 84                     |
| 3     | DCE as solvent                                  | 71                     |
| 4     | DMSO as solvent                                 | 59                     |
| 5     | 400 nm light instead of 100W Blue LEDs          | 37                     |
| 6     | 435 nm light instead of 100W Blue LEDs          | 69                     |
| 7     | 475 nm light instead of 100W Blue LEDs          | 32                     |
| 8     | Dark conditions                                 | n.d.                   |
| 9     | No CeCl <sub>3</sub>                            | n.d.                   |
| 10    | Nitrogen atmosphere                             | n.d.                   |

<sup>a</sup> Conditions: 3-Phthalimidopropionic acid (1) (0.2 mmol), NBS (1.5 equiv.), CeCl<sub>3</sub> (10 mol%), *t*-BuONa (30 mol %), H<sub>2</sub>O (2 mL), room temperature, air atmosphere, 100W Blue LEDs, 12 h. <sup>b</sup> Determined by <sup>1</sup>HNMR spectroscopy using 1,3,5-trimethoxybenzene as internal standard. n.d. No detected.

## V. Characterization Data for the products

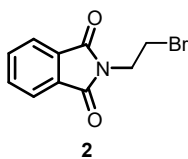

**2-(2-bromoethyl)isoindoline-1,3-dione**

According to general procedure A: using 3-(1,3-dioxisoindolin-2-yl) propanoic acid (0.3 mmol, 66 mg), 1-bromopyrrolidine-2,5-dione (0.45 mmol, 80 mg),  $\text{CeCl}_3$  (0.03 mmol, 7.4 mg),  $t\text{-BuONa}$  (0.09 mmol, 8.6 mg) and 3 mL  $\text{H}_2\text{O}$ . Purification by flash column chromatography (eluent: PE/EA = 20/1) gave the title compound as white solid (62.5 mg, 82% yield).

$^1\text{H NMR}$  (400 MHz,  $\text{CHCl}_3$ - $d$ )  $\delta$  7.89 – 7.83 (m, 2H), 7.76 – 7.70 (m, 2H), 4.10 (t,  $J$  = 6.8 Hz, 2H), 3.61 (t,  $J$  = 7.3 Hz, 2H).

$^{13}\text{C NMR}$  (101 MHz,  $\text{CHCl}_3$ - $d$ )  $\delta$  167.77, 134.19, 131.87, 123.49, 39.32, 28.08.

(Known compound: ACS Omega. 2021, 6, 33846).

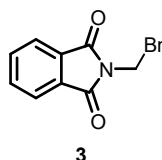

**2-(bromomethyl)isoindoline-1,3-dione**

According to general procedure A: using 2-(1,3-dioxisoindolin-2-yl) acetic acid (0.3 mmol, 62 mg), 1-bromopyrrolidine-2,5-dione (0.45 mmol, 80 mg),  $\text{CeCl}_3$  (0.03 mmol, 7.4 mg),  $t\text{-BuONa}$  (0.09 mmol, 8.6 mg) and 3 mL  $\text{H}_2\text{O}$ . Purification by flash column chromatography (eluent: PE/EA = 20/1) gave the title compound as white solid (54 mg, 75% yield).

$^1\text{H NMR}$  (400 MHz,  $\text{DMSO}-d_6$ )  $\delta$  7.93 – 7.85 (m, 4H), 4.96 (s, 2H).

$^{13}\text{C NMR}$  (101 MHz,  $\text{DMSO}-d_6$ )  $\delta$  167.83, 135.21, 132.00, 123.77, 60.61.

(Known compound: *J. Am. Chem. Soc.* **2018**, 140, 15190).

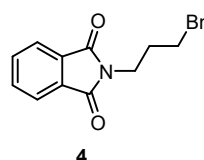

**2-(3-bromopropyl)isoindoline-1,3-dione**

According to general procedure A: using 4-(1,3-dioxisoindolin-2-yl) butanoic acid (0.3 mmol, 70 mg), 1-bromopyrrolidine-2,5-dione (0.45 mmol, 80 mg),  $\text{CeCl}_3$  (0.03 mmol, 7.4 mg),  $t\text{-BuONa}$  (0.09 mmol, 8.6 mg) and 3 mL  $\text{H}_2\text{O}$ . Purification by flash column chromatography (eluent: PE/EA = 20/1) gave the title compound as white solid (65 mg, 81% yield).

$^1\text{H NMR}$  (400 MHz,  $\text{CHCl}_3$ - $d$ )  $\delta$  7.88 – 7.82 (m, 2H), 7.75 – 7.70 (m, 2H), 3.84 (t,  $J$  = 6.8 Hz, 2H), 3.41 (t,  $J$  = 6.7 Hz, 2H), 2.30 – 2.22 (m, 2H).

$^{13}\text{C NMR}$  (101 MHz,  $\text{CHCl}_3$ - $d$ )  $\delta$  168.21, 134.03, 132.04, 123.32, 36.76, 31.66, 29.72.

(Known compound: *SynOpen.* **2017**; 1, 173).

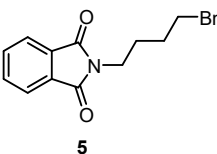

**2-(4-bromobutyl)isoindoline-1,3-dione**



According to general procedure A: using 5-(1,3-dioxoisindolin-2-yl) pentanoic acid (0.3 mmol, 74 mg), 1-bromopyrrolidine-2,5-dione (0.45 mmol, 80 mg),  $\text{CeCl}_3$  (0.03 mmol, 7.4 mg), *t*-BuONa (0.09 mmol, 8.6 mg) and 3 mL  $\text{H}_2\text{O}$ . Purification by flash column chromatography (eluent: PE/EA = 20/1) gave the title compound as white solid (62 mg, 73% yield).

$^1\text{H NMR}$  (400 MHz, Chloroform-*d*)  $\delta$  7.86 – 7.81 (m, 2H), 7.74 – 7.69 (m, 2H), 3.72 (t,  $J = 6.7$  Hz, 2H), 3.44 (t,  $J = 6.3$  Hz, 2H), 1.95 – 1.80 (m, 4H).

$^{13}\text{C NMR}$  (101 MHz, Chloroform-*d*)  $\delta$  168.32, 133.95, 132.08, 123.24, 36.97, 32.69, 29.87, 27.25.

(Known compound: *J. Org. Chem.* **2004**, 69, 18, 6094).

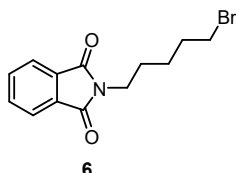

2-(5-bromopentyl)isoindoline-1,3-dione

According to general procedure A: using 6-(1,3-dioxoisindolin-2-yl) hexanoic acid (0.3 mmol, 78 mg), 1-bromopyrrolidine-2,5-dione (0.45 mmol, 80 mg),  $\text{CeCl}_3$  (0.03 mmol, 7.4 mg), *t*-BuONa (0.09 mmol, 8.6 mg) and 3 mL  $\text{H}_2\text{O}$ . Purification by flash column chromatography (eluent: PE/EA = 20/1) gave the title compound as colorless oil (62 mg, 70% yield).

$^1\text{H NMR}$  (400 MHz, Chloroform-*d*)  $\delta$  7.78 – 7.73 (m, 2H), 7.67 – 7.62 (m, 2H), 3.62 (t,  $J = 7.2$  Hz, 2H), 3.32 (t,  $J = 6.7$  Hz, 2H), 1.88 – 1.79 (m, 2H), 1.69 – 1.60 (m, 2H), 1.47 – 1.38 (m, 2H).

$^{13}\text{C NMR}$  (101 MHz, Chloroform-*d*)  $\delta$  168.23, 133.84, 132.08, 123.10, 37.59, 33.32, 32.15, 27.66, 25.35.

(Known compound: *ChemPhysChem.* 2013, 14, 390).

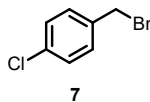

1-(bromomethyl)-4-chlorobenzene

According to general procedure A: using 2-(4-chlorophenyl) acetic acid (0.3 mmol, 51 mg), 1-bromopyrrolidine-2,5-dione (0.33 mmol, 59 mg),  $\text{CeCl}_3$  (0.03 mmol, 7.4 mg), *t*-BuONa (0.09 mmol, 8.6 mg) and 3 mL  $\text{H}_2\text{O}$ . Purification by flash column chromatography (eluent: PE) gave the title compound as white solid (50 mg, 81% yield).

$^1\text{H NMR}$  (400 MHz, Chloroform-*d*)  $\delta$  7.32 (s, 4H), 4.46 (s, 2H).

$^{13}\text{C NMR}$  (101 MHz, Chloroform-*d*)  $\delta$  136.31, 134.32, 130.40, 129.02, 32.43.

(Known compound: *Green Chem.*, **2008**, 10, 232).

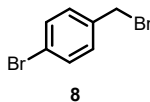

1-bromo-4-(bromomethyl)benzene

According to general procedure A: using 2-(4-bromophenyl) acetic acid (0.3 mmol, 65 mg), 1-bromopyrrolidine-2,5-dione (0.33 mmol, 59 mg),  $\text{CeCl}_3$  (0.03 mmol, 7.4 mg), *t*-BuONa (0.09 mmol, 8.6 mg) and 3 mL  $\text{H}_2\text{O}$ . Purification by flash column chromatography (eluent: PE) gave the title compound as white solid (62 mg, 83% yield).

$^1\text{H NMR}$  (400 MHz, Chloroform-*d*)  $\delta$  7.50 (d,  $J = 7.5$  Hz, 2H), 7.29 (d,  $J = 8.3$  Hz, 2H), 4.46 (s, 2H).

$^{13}\text{C NMR}$  (101 MHz, Chloroform-*d*)  $\delta$  136.80, 131.98, 130.68, 122.48, 32.40.

(Known compound: *Tetrahedron Lett.* **2009**, 65, 4429).

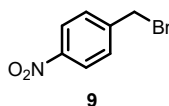

**9**  
1-(bromomethyl)-4-nitrobenzene

According to general procedure A: using 2-(4-nitrophenyl) acetic acid (0.3 mmol, 54 mg), 1-bromopyrrolidine-2,5-dione (0.33 mmol, 59 mg),  $\text{CeCl}_3$  (0.03 mmol, 7.4 mg), *t*-BuONa (0.09 mmol, 8.6 mg) and 3 mL  $\text{H}_2\text{O}$ . Purification by flash column chromatography (eluent: PE/EA = 100/1) gave the title compound as white solid (45 mg, 70% yield).

$^1\text{H NMR}$  (400 MHz, Chloroform-*d*)  $\delta$  8.23 (d,  $J = 8.7$  Hz, 2H), 7.59 (d,  $J = 7.5$  Hz, 2H), 4.54 (s, 2H).

$^{13}\text{C NMR}$  (101 MHz, Chloroform-*d*)  $\delta$  147.67, 144.77, 129.93, 124.06, 30.94.

(Known compound: *Tetrahedron Lett.* **2009**, 65, 4429).

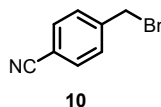

**10**  
4-(bromomethyl)benzonitrile

According to general procedure A: using 2-(4-cyanophenyl) acetic acid (0.3 mmol, 49 mg), 1-bromopyrrolidine-2,5-dione (0.33 mmol, 59 mg),  $\text{CeCl}_3$  (0.03 mmol, 7.4 mg), *t*-BuONa (0.09 mmol, 8.6 mg) and 3 mL  $\text{H}_2\text{O}$ . Purification by flash column chromatography (eluent: PE) gave the title compound as white solid (41 mg, 69% yield).

$^1\text{H NMR}$  (400 MHz, Chloroform-*d*)  $\delta$  7.64 (d,  $J = 7.9$  Hz, 2H), 7.50 (d,  $J = 7.8$  Hz, 2H), 4.48 (s, 2H).

$^{13}\text{C NMR}$  (101 MHz, Chloroform-*d*)  $\delta$  142.83, 132.60, 129.73, 118.38, 112.22, 31.50.

(Known compound: *Eur. J. Med. Chem.* **2010**, 45, 5384).

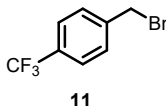

**11**  
1-(bromomethyl)-4-(trifluoromethyl)benzene

According to general procedure A: using 2-(4-(trifluoromethyl) phenyl) acetic acid (0.3 mmol, 61 mg), 1-bromopyrrolidine-2,5-dione (0.33 mmol, 59 mg),  $\text{CeCl}_3$  (0.03 mmol, 7.4 mg), *t*-BuONa (0.09 mmol, 8.6 mg) and 3 mL  $\text{H}_2\text{O}$ . Purification by flash column chromatography (eluent: PE) gave the title compound as white solid (54 mg, 76% yield).

$^1\text{H NMR}$  (400 MHz, Chloroform-*d*)  $\delta$  7.63 (d,  $J = 8.1$  Hz, 2H), 7.54 (d,  $J = 8.0$  Hz, 2H), 4.53 (s, 2H).

$^{13}\text{C NMR}$  (101 MHz, Chloroform-*d*)  $\delta$  141.63, 130.51 (q,  $J = 32.6$  Hz), 129.36, 125.79 (q,  $J = 3.7$  Hz), 123.88 (q,  $J = 273.4$  Hz), 31.81.

$^{19}\text{F NMR}$  (376 MHz, Chloroform-*d*)  $\delta$  -62.75.

(Known compound: *Org. Lett.* **2004**, 6, 3353).

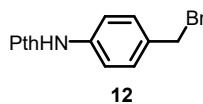

**12**  
2-(4-(bromomethyl)phenyl)isoindoline-1,3-dione

According to general procedure A: using 2-(4-(1,3-dioxisoindolin-2-yl) phenyl) acetic acid (0.3 mmol, 84 mg), 1-bromopyrrolidine-2,5-dione (0.33 mmol, 59 mg),  $\text{CeCl}_3$  (0.03 mmol, 7.4 mg), *t*-BuONa (0.09 mmol, 8.6 mg) and 3 mL  $\text{H}_2\text{O}$ . Purification by flash column chromatography (eluent: PE/EA = 100/1) gave the title compound as white solid (53 mg, 56% yield).

**<sup>1</sup>H NMR (400 MHz, Chloroform-*d*)**  $\delta$  7.99 (dd,  $J = 5.6, 2.9$  Hz, 2H), 7.83 (dd,  $J = 5.9, 3.1$  Hz, 2H), 7.56 (d,  $J = 8.1$  Hz, 2H), 7.47 (d,  $J = 8.6$  Hz, 2H), 4.55 (d,  $J = 2.5$  Hz, 2H).

**<sup>13</sup>C NMR (101 MHz, Chloroform-*d*)**  $\delta$  167.10, 137.49, 134.54, 131.68, 129.84, 126.70, 123.85, 32.59.  
(Known compound: *Green Chem.* **2011**, 13, 928).

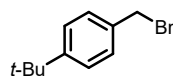

**13**

**1-(bromomethyl)-4-(tert-butyl)benzene**

According to general procedure A: using 2-(4-(tert-butyl) phenyl) acetic acid (0.3 mmol, 58 mg), 1-bromopyrrolidine-2,5-dione (0.33 mmol, 59 mg), CeCl<sub>3</sub> (0.03 mmol, 7.4 mg), *t*-BuONa (0.09 mmol, 8.6 mg) and 3 mL H<sub>2</sub>O. Purification by flash column chromatography (eluent: PE) gave the title compound as colorless oil (46 mg, 68% yield).

**<sup>1</sup>H NMR (400 MHz, Chloroform-*d*)**  $\delta$  7.39 (d,  $J = 8.3$  Hz, 2H), 7.34 (d,  $J = 8.4$  Hz, 2H), 4.51 (s, 2H), 1.33 (s, 9H).

**<sup>13</sup>C NMR (101 MHz, Chloroform-*d*)**  $\delta$  151.60, 134.79, 128.81, 125.81, 34.68, 33.67, 31.30.

(Known compound: *Org. Lett.* **2013**, 15, 2210).

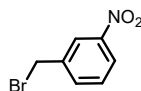

**14**

**1-(bromomethyl)-3-nitrobenzene**

According to general procedure A: using 2-(3-nitrophenyl) acetic acid (0.3 mmol, 54 mg), 1-bromopyrrolidine-2,5-dione (0.33 mmol, 59 mg), CeCl<sub>3</sub> (0.03 mmol, 7.4 mg), *t*-BuONa (0.09 mmol, 8.6 mg) and 3 mL H<sub>2</sub>O. Purification by flash column chromatography (eluent: PE/EA = 100/1) gave the title compound as white solid (45 mg, 69% yield).

**<sup>1</sup>H NMR (400 MHz, Chloroform-*d*)**  $\delta$  8.30 – 8.24 (m, 1H), 8.17 (d,  $J = 8.5$  Hz, 1H), 7.73 (d,  $J = 7.6$  Hz, 1H), 7.54 (td,  $J = 8.0, 1.9$  Hz, 1H), 4.54 (s, 2H).

**<sup>13</sup>C NMR (101 MHz, Chloroform-*d*)**  $\delta$  148.37, 139.73, 135.02, 129.90, 123.94, 123.33, 31.13.

(Known compound: *Green Chem.* **2008**, 10, 232).

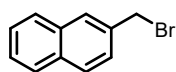

**15**

**2-(bromomethyl)naphthalene**

According to general procedure A: using 2-(naphthalen-2-yl) acetic acid (0.3 mmol, 56 mg), 1-bromopyrrolidine-2,5-dione (0.33 mmol, 59 mg), CeCl<sub>3</sub> (0.03 mmol, 7.4 mg), *t*-BuONa (0.09 mmol, 8.6 mg) and 3 mL H<sub>2</sub>O. Purification by flash column chromatography (eluent: PE) gave the title compound as white solid (47 mg, 71% yield).

**<sup>1</sup>H NMR (400 MHz, Chloroform-*d*)**  $\delta$  7.84 (q,  $J = 4.1$  Hz, 4H), 7.51 (dd,  $J = 8.2, 4.7$  Hz, 3H), 4.68 (s, 2H).

**<sup>13</sup>C NMR (101 MHz, Chloroform-*d*)**  $\delta$  135.10, 133.18, 133.09, 128.80, 127.99, 127.88, 127.75, 126.79, 126.60, 126.50, 34.10.

(Known compound: *J. Org. Chem.* **2006**, 71, 8276).

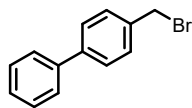

16

4-(bromomethyl)-1,1'-biphenyl

According to general procedure A: using 2-([1,1'-biphenyl]-4-yl) acetic acid (0.3 mmol, 64 mg), 1-bromopyrrolidine-2,5-dione (0.33 mmol, 59 mg),  $\text{CeCl}_3$  (0.03 mmol, 7.4 mg), *t*-BuONa (0.09 mmol, 8.6 mg) and 3 mL  $\text{H}_2\text{O}$ . Purification by flash column chromatography (eluent: PE) gave the title compound as white solid (53 mg, 72% yield).

$^1\text{H NMR}$  (400 MHz, Chloroform-*d*)  $\delta$  7.61 – 7.56 (m, 4H), 7.47 (d,  $J = 7.2$  Hz, 4H), 7.38 (d,  $J = 7.4$  Hz, 1H), 4.56 (s, 2H).

$^{13}\text{C NMR}$  (101 MHz, Chloroform-*d*)  $\delta$  141.41, 140.45, 136.77, 129.52, 128.85, 127.57, 127.13, 33.41. (one signal is missing due to overlapping).

(Known compound: *Bioorg. Med. Chem.* **2011**, 19, 1802).

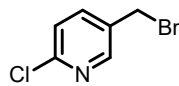

17

5-(bromomethyl)-2-chloropyridine

According to general procedure A: using 2-(6-chloropyridin-3-yl) acetic acid (0.3 mmol, 52 mg), 1-bromopyrrolidine-2,5-dione (0.33 mmol, 59 mg),  $\text{CeCl}_3$  (0.03 mmol, 7.4 mg), *t*-BuONa (0.09 mmol, 8.6 mg) and 3 mL  $\text{H}_2\text{O}$ . Purification by flash column chromatography (eluent: PE) gave the title compound as yellow solid (38 mg, 62% yield).

$^1\text{H NMR}$  (400 MHz, Chloroform-*d*)  $\delta$  8.39 (d,  $J = 2.9$  Hz, 1H), 7.69 (dd,  $J = 8.0, 2.7$  Hz, 1H), 7.32 (dd,  $J = 8.3, 2.1$  Hz, 1H), 4.43 (s, 2H).

$^{13}\text{C NMR}$  (101 MHz, Chloroform-*d*)  $\delta$  151.32, 149.55, 139.43, 132.68, 124.49, 28.40.

(Known compound: *Eur. J. Org. Chem.* **2015**, 8, 1764).

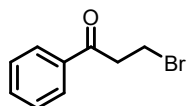

18

3-bromo-1-phenylpropan-1-one

According to general procedure A: using 4-oxo-4-phenylbutanoic acid (0.3 mmol, 54 mg), 1-bromopyrrolidine-2,5-dione (0.45 mmol, 80 mg),  $\text{CeCl}_3$  (0.03 mmol, 7.4 mg), *t*-BuONa (0.09 mmol, 8.6 mg) and 3 mL  $\text{H}_2\text{O}$ . Purification by flash column chromatography (eluent: PE/EA = 100/1) gave the title compound as colorless oil (45 mg, 71% yield).

$^1\text{H NMR}$  (400 MHz, Chloroform-*d*)  $\delta$  7.99 – 7.93 (m, 2H), 7.63 – 7.56 (m, 1H), 7.52 – 7.46 (m, 2H), 3.75 (t,  $J = 7.0$  Hz, 2H), 3.58 (t,  $J = 7.2$  Hz, 2H).

$^{13}\text{C NMR}$  (101 MHz, Chloroform-*d*)  $\delta$  196.94, 136.29, 133.55, 128.75, 128.05, 41.56, 25.69.

(Known compound: *Org. Lett.* **2007**, 9, 1323).

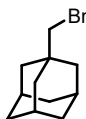

19

(3*r*,5*r*,7*r*)-1-(bromomethyl)adamantane

According to general procedure A: using 2-((3*r*,5*r*,7*r*)-adamantan-1-yl) acetic acid (0.3 mmol, 58 mg), 1-bromopyrrolidine-2,5-dione (0.45 mmol, 80 mg), CeCl<sub>3</sub> (0.03 mmol, 7.4 mg), *t*-BuONa (0.09 mmol, 8.6 mg) and 3 mL H<sub>2</sub>O. Purification by flash column chromatography (eluent: PE) gave the title compound as colorless oil (38 mg, 56% yield).

**<sup>1</sup>H NMR (400 MHz, Chloroform-*d*)** δ 3.15 (s, 2H), 2.04 – 1.95 (m, 3H), 1.71 – 1.60 (m, 6H), 1.56 (d, *J* = 3.1 Hz, 6H).

**<sup>13</sup>C NMR (101 MHz, Chloroform-*d*)** δ 48.48, 40.69, 36.70, 33.57, 28.37.

(Known compound: *J. Med. Chem.* **2011**, 54, 2069).

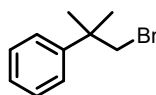

**20**

**(1-bromo-2-methylpropan-2-yl)benzene**

According to general procedure A: using 3-methyl-3-phenylbutanoic acid (0.3 mmol, 53 mg), 1-bromopyrrolidine-2,5-dione (0.45 mmol, 80 mg), CeCl<sub>3</sub> (0.03 mmol, 7.4 mg), *t*-BuONa (0.09 mmol, 8.6 mg) and 3 mL H<sub>2</sub>O. Purification by flash column chromatography (eluent: PE) gave the title compound as colorless oil (44 mg, 69% yield).

**<sup>1</sup>H NMR (400 MHz, Chloroform-*d*)** δ 7.50 – 7.41 (m, 4H), 7.37 – 7.30 (m, 1H), 3.68 (s, 2H), 1.58 (s, 6H).

**<sup>13</sup>C NMR (101 MHz, Chloroform-*d*)** δ 146.08, 128.43, 126.60, 125.90, 46.92, 39.22, 27.35.

(Known compound: *Bull. Chem. Soc. Jpn.* **1982**, 55, 255).

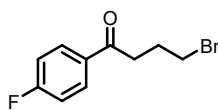

**21**

**4-bromo-1-(4-fluorophenyl)butan-1-one**

According to general procedure A: using 5-(4-fluorophenyl)-5-oxopentanoic acid (0.3 mmol, 63 mg), 1-bromopyrrolidine-2,5-dione (0.45 mmol, 80 mg), CeCl<sub>3</sub> (0.03 mmol, 7.4 mg), *t*-BuONa (0.09 mmol, 8.6 mg) and 3 mL H<sub>2</sub>O. Purification by flash column chromatography (eluent: PE/EA = 100/1) gave the title compound as colorless oil (64 mg, 88% yield).

**<sup>1</sup>H NMR (400 MHz, Chloroform-*d*)** δ 8.06 – 7.97 (m, 2H), 7.19 – 7.10 (m, 2H), 3.55 (t, *J* = 6.3 Hz, 2H), 3.16 (t, *J* = 6.9 Hz, 2H), 2.37 – 2.26 (m, 2H).

**<sup>13</sup>C NMR (101 MHz, Chloroform-*d*)** δ 197.21, 165.85 (d, *J* = 254.9 Hz), 133.18 (d, *J* = 3.0 Hz), 130.68 (d, *J* = 9.4 Hz), 115.78 (d, *J* = 21.9 Hz), 36.46, 33.59, 26.79.

**<sup>19</sup>F NMR (376 MHz, Chloroform-*d*)** δ -104.93.

(Known compound: *Green Chem.* **2020**, 22, 4357).

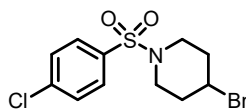

**22**

**4-bromo-1-(4-chlorophenyl)sulfonylpiperidine**

According to general procedure A: using 1-((4-chlorophenyl) sulfonyl) piperidine-4-carboxylic acid (0.3 mmol, 91 mg), 1-bromopyrrolidine-2,5-dione (0.45 mmol, 80 mg), CeCl<sub>3</sub> (0.03 mmol, 7.4 mg), *t*-BuONa (0.09 mmol, 8.6 mg) and 3 mL H<sub>2</sub>O. Purification by flash column chromatography (eluent:

PE/EA = 100/1) gave the title compound as white solid (72mg, 71% yield).

**<sup>1</sup>H NMR (400 MHz, Chloroform-*d*)** δ 7.70 (d, *J* = 6.3 Hz, 2H), 7.52 (d, *J* = 6.4 Hz, 2H), 4.34 – 4.21 (m, 1H), 3.24 – 3.10 (m, 4H), 2.25 – 2.12 (m, 2H), 2.12 – 2.01 (m, 2H).

**<sup>13</sup>C NMR (101 MHz, Chloroform-*d*)** δ 139.52, 134.85, 129.52, 128.95, 47.58, 43.59, 34.56.

**HRMS:** C<sub>11</sub>H<sub>14</sub>BrClNO<sub>2</sub>S [M+H]<sup>+</sup>; calculated: 337.9617, found: 337.9614.

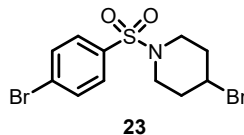

**23**  
**4-bromo-1-((4-bromophenyl)sulfonyl)piperidine**

According to general procedure A: using 1-((4-bromophenyl) sulfonyl) piperidine-4-carboxylic acid (0.3 mmol, 104 mg), 1-bromopyrrolidine-2,5-dione (0.45 mmol, 80 mg), CeCl<sub>3</sub> (0.03 mmol, 7.4 mg), *t*-BuONa (0.09 mmol, 8.6 mg) and 3 mL H<sub>2</sub>O. Purification by flash column chromatography (eluent: PE/EA = 100/1) gave the title compound as white solid (84 mg, 73% yield).

**<sup>1</sup>H NMR (400 MHz, Chloroform-*d*)** δ 7.69 (d, *J* = 8.5 Hz, 2H), 7.63 (d, *J* = 8.6 Hz, 2H), 4.31 – 4.24 (m, 1H), 3.24 – 3.10 (m, 4H), 2.25 – 2.13 (m, 2H), 2.09 – 1.97 (m, 2H).

**<sup>13</sup>C NMR (101 MHz, Chloroform-*d*)** δ 135.59, 132.48, 129.02, 127.97, 47.51, 43.60, 34.61.

**HRMS:** C<sub>11</sub>H<sub>14</sub>Br<sub>2</sub>NO<sub>2</sub>S [M+H]<sup>+</sup>; calculated: 383.9091, found: 383.9089.

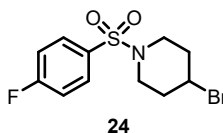

**24**  
**4-bromo-1-((4-fluorophenyl)sulfonyl)piperidine**

According to general procedure A: using 1-((4-fluorophenyl) sulfonyl) piperidine-4-carboxylic acid (0.3 mmol, 86 mg), 1-bromopyrrolidine-2,5-dione (0.45 mmol, 80 mg), CeCl<sub>3</sub> (0.03 mmol, 7.4 mg), *t*-BuONa (0.09 mmol, 8.6 mg) and 3 mL H<sub>2</sub>O. Purification by flash column chromatography (eluent: PE/EA = 100/1) gave the title compound as white solid (75 mg, 78% yield).

**<sup>1</sup>H NMR (400 MHz, Chloroform-*d*)** δ 7.85 (d, *J* = 5.0 Hz, 2H), 7.29 (d, *J* = 10.4 Hz, 2H), 4.37 – 4.28 (m, 1H), 3.28 – 3.15 (m, 4H), 2.30 – 2.18 (m, 2H), 2.15 – 2.05 (m, 2H).

**<sup>13</sup>C NMR (101 MHz, Chloroform-*d*)** δ 165.26 (d, *J* = 255.3 Hz), 132.37 (d, *J* = 3.3 Hz), 130.23 (d, *J* = 9.3 Hz), 116.48 (d, *J* = 22.5 Hz), 47.64, 43.59, 34.56.

**<sup>19</sup>F NMR (376 MHz, Chloroform-*d*)** δ -104.82.

**HRMS:** C<sub>11</sub>H<sub>14</sub>BrFNO<sub>2</sub>S [M+H]<sup>+</sup>; calculated: 321.9907, found: 321.9900.

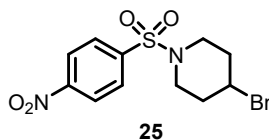

**25**  
**4-bromo-1-((4-nitrophenyl)sulfonyl)piperidine**

According to general procedure A: using 1-((4-nitrophenyl) sulfonyl) piperidine-4-carboxylic acid (0.3 mmol, 94 mg), 1-bromopyrrolidine-2,5-dione (0.45 mmol, 80 mg), CeCl<sub>3</sub> (0.03 mmol, 7.4 mg), *t*-BuONa (0.09 mmol, 8.6 mg) and 3 mL H<sub>2</sub>O. Purification by flash column chromatography (eluent: PE/EA = 20/1) gave the title compound as white solid (65 mg, 62% yield).

**<sup>1</sup>H NMR (400 MHz, Chloroform-*d*)** δ 8.40 (d, *J* = 8.8 Hz, 2H), 7.96 (d, *J* = 8.8 Hz, 2H), 4.36 – 4.29 (m, 1H), 3.32 – 3.16 (m, 4H), 2.25 – 2.03 (m, 4H).

$^{13}\text{C}$  NMR (101 MHz, Chloroform-*d*)  $\delta$  150.28, 142.55, 128.70, 124.49, 47.29, 43.36, 34.43.

HRMS:  $\text{C}_{11}\text{H}_{12}\text{BrN}_2\text{O}_4\text{S}$  [M-H] $^-$ ; calculated: 346.9701, found: 346.9694.

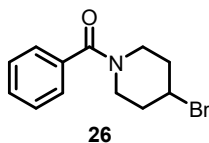

**(4-bromopiperidin-1-yl)(phenyl)methanone**

According to general procedure A: using 1-benzoylpiperidine-4-carboxylic acid (0.3 mmol, 70 mg), 1-bromopyrrolidine-2,5-dione (0.45 mmol, 80 mg),  $\text{CeCl}_3$  (0.03 mmol, 7.4 mg), *t*-BuONa (0.09 mmol, 8.6 mg) and 3 mL  $\text{H}_2\text{O}$ . Purification by flash column chromatography (eluent: PE/EA = 100/1) gave the title compound as white solid (58 mg, 72% yield).

$^1\text{H}$  NMR (400 MHz, Chloroform-*d*)  $\delta$  7.47 – 7.34 (m, 5H), 4.43 (tt,  $J = 7.4, 3.7$  Hz, 1H), 3.67 (t,  $J = 114.5$  Hz, 4H), 2.25 – 1.86 (m, 4H).

$^{13}\text{C}$  NMR (101 MHz, Chloroform-*d*)  $\delta$  170.49, 135.72, 129.76, 128.54, 126.85, 48.77.

(Known compound: *Org. Lett.* **2011**, 13, 2138).

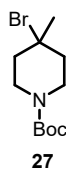

**tert-butyl 4-bromo-4-methylpiperidine-1-carboxylate**

According to general procedure A: using 1-(tert-butoxycarbonyl)-4-methylpiperidine-4-carboxylic acid (0.3 mmol, 73 mg), 1-bromopyrrolidine-2,5-dione (0.45 mmol, 80 mg),  $\text{CeCl}_3$  (0.03 mmol, 7.4 mg), *t*-BuONa (0.09 mmol, 8.6 mg) and 3 mL  $\text{H}_2\text{O}$ . Purification by flash column chromatography (eluent: PE/EA = 100/1) gave the title compound as colorless oil (62 mg, 74% yield).

$^1\text{H}$  NMR (400 MHz, Chloroform-*d*)  $\delta$  4.12 – 3.85 (m, 2H), 3.13 (t,  $J = 12.5$  Hz, 2H), 1.97 (d,  $J = 14.4$  Hz, 2H), 1.84 (s, 3H), 1.54 (td,  $J = 13.4, 12.0, 4.1$  Hz, 2H), 1.42 (s, 9H).

$^{13}\text{C}$  NMR (101 MHz, Chloroform-*d*)  $\delta$  154.63, 79.67, 67.82, 41.55, 35.01, 28.43. (one carbon signal is overlapped)

(Known compound: *J. Am. Chem. Soc.* **2017**, 139, 18037).

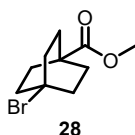

**methyl 4-bromobicyclo[2.2.2]octane-1-carboxylate**

According to general procedure A: using 4-(methoxycarbonyl) bicyclo [2.2.2] octane-1-carboxylic acid (0.3 mmol, 64 mg), 1-bromopyrrolidine-2,5-dione (0.45 mmol, 80 mg),  $\text{CeCl}_3$  (0.03 mmol, 7.4 mg), *t*-BuONa (0.09 mmol, 8.6 mg) and 3 mL  $\text{H}_2\text{O}$ . Purification by flash column chromatography (eluent: PE/EA = 100/1) gave the title compound as white solid (60 mg, 81% yield).

$^1\text{H}$  NMR (400 MHz, Chloroform-*d*)  $\delta$  3.63 (s, 3H), 2.37 – 2.14 (m, 6H), 2.00 – 1.91 (m, 6H).

$^{13}\text{C}$  NMR (101 MHz, Chloroform-*d*)  $\delta$  177.12, 62.16, 51.89, 36.87, 36.83, 31.17.

(Known compound: *Org. Process Res. Dev.* **2020**, 24, 1328).

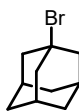

29

(3s,5s,7s)-1-bromoadamantane

According to general procedure A: using (3r,5r,7r)-adamantane-1-carboxylic acid (0.3 mmol, 52 mg), 1-bromopyrrolidine-2,5-dione (0.45 mmol, 80 mg), CeCl<sub>3</sub> (0.03 mmol, 7.4 mg), *t*-BuONa (0.09 mmol, 8.6 mg) and 3 mL H<sub>2</sub>O. Purification by flash column chromatography (eluent: PE) gave the title compound as white solid (54 mg, 83% yield).

<sup>1</sup>H NMR (400 MHz, Chloroform-*d*) δ 2.37 (d, *J* = 3.0 Hz, 6H), 2.13 – 2.07 (m, 3H), 1.73 (t, *J* = 3.1 Hz, 6H).

<sup>13</sup>C NMR (101 MHz, Chloroform-*d*) δ 66.67, 49.35, 35.56, 32.62.

(Known compound: *F. Glorius, Chem. Eur. J.* **2016**, 22, 9971).

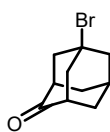

30

(1R,3S,5S,7S)-5-bromoadamantan-2-one

According to general procedure A: using (1s,3R,5S,7s)-4-oxoadamantane-1-carboxylic acid (0.3 mmol, 58 mg), 1-bromopyrrolidine-2,5-dione (0.45 mmol, 80 mg), CeCl<sub>3</sub> (0.03 mmol, 7.4 mg), *t*-BuONa (0.09 mmol, 8.6 mg) and 3 mL H<sub>2</sub>O. Purification by flash column chromatography (eluent: PE) gave the title compound as colorless oil (52 mg, 76% yield).

<sup>1</sup>H NMR (400 MHz, Chloroform-*d*) δ 2.73 – 2.42 (m, 8H), 2.26 (s, 1H), 2.12 – 1.96 (m, 4H).

<sup>13</sup>C NMR (101 MHz, Chloroform-*d*) δ 214.44, 59.94, 49.07, 49.00, 47.79, 37.52, 31.30.

(Known compound: *Org. Lett.* **2010**, 12, 332).

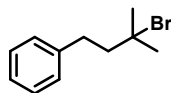

31

(3-bromo-3-methylbutyl)benzene

According to general procedure A: 2,2-dimethyl-4-phenylbutanoic acid (0.3 mmol, 58 mg), 1-bromopyrrolidine-2,5-dione (0.45 mmol, 80 mg), CeCl<sub>3</sub> (0.03 mmol, 7.4 mg), *t*-BuONa (0.09 mmol, 8.6 mg) and 3 mL H<sub>2</sub>O. Purification by flash column chromatography (eluent: PE) gave the title compound as colorless oil (49 mg, 72% yield).

<sup>1</sup>H NMR (400 MHz, Chloroform-*d*) δ 7.33 – 7.28 (m, 2H), 7.26 – 7.21 (m, 3H), 2.91 – 2.84 (m, 2H), 2.14 – 2.07 (m, 2H), 1.84 (s, 6H).

<sup>13</sup>C NMR (101 MHz, Chloroform-*d*) δ 141.62, 128.51, 128.45, 126.01, 67.55, 49.47, 34.31, 32.93.

(Known compound: *Science.* **2022**, 376, 410).

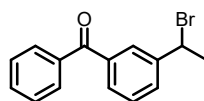

32

(3-(1-bromoethyl)phenyl)(phenyl)methanone

According to general procedure A: using ketoprofen (0.3 mmol, 76 mg), 1-bromopyrrolidine-2,5-dione



(0.45 mmol, 80 mg),  $\text{CeCl}_3$  (0.03 mmol, 7.4 mg), *t*-BuONa (0.09 mmol, 8.6 mg) and 3 mL  $\text{H}_2\text{O}$ . Purification by flash column chromatography (eluent: PE) gave the title compound as yellow oil (70 mg, 81% yield).

$^1\text{H NMR}$  (400 MHz, Chloroform-*d*)  $\delta$  7.88 (s, 1H), 7.81 (d,  $J = 7.6$  Hz, 2H), 7.69 (t,  $J = 7.6$  Hz, 2H), 7.61 (t,  $J = 7.5$  Hz, 1H), 7.54 – 7.44 (m, 3H), 5.25 (q,  $J = 7.0$  Hz, 1H), 2.07 (d,  $J = 6.8$  Hz, 3H).

$^{13}\text{C NMR}$  (101 MHz, Chloroform-*d*)  $\delta$  196.18, 143.67, 137.98, 137.32, 132.65, 130.87, 130.08, 130.05, 128.71, 128.40, 128.23, 48.40, 26.76.

(Known compound: *Org. Process Res. Dev.* **2020**, 24, 1328).

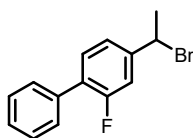

33

4-(1-bromoethyl)-2-fluoro-1,1'-biphenyl

According to general procedure A: using flurbiprofen (0.3 mmol, 73 mg), 1-bromopyrrolidine-2,5-dione (0.45 mmol, 80 mg),  $\text{CeCl}_3$  (0.03 mmol, 7.4 mg), *t*-BuONa (0.09 mmol, 8.6 mg) and 3 mL  $\text{H}_2\text{O}$ . Purification by flash column chromatography (eluent: PE) gave the title compound as colorless oil (61 mg, 73% yield).

$^1\text{H NMR}$  (400 MHz, Chloroform-*d*)  $\delta$  7.60 – 7.54 (m, 2H), 7.51 – 7.39 (m, 4H), 7.34 – 7.27 (m, 2H), 5.24 (q,  $J = 7.0$  Hz, 1H), 2.10 (d,  $J = 6.9$  Hz, 3H).

$^{13}\text{C NMR}$  (101 MHz, Chloroform-*d*)  $\delta$  159.54 (d,  $J = 249.2$  Hz), 144.49 (d,  $J = 7.2$  Hz), 135.23, 130.95 (d,  $J = 3.8$  Hz), 129.13, 128.96 (d,  $J = 2.9$  Hz), 128.51, 127.90, 47.94, 26.63.

$^{19}\text{F NMR}$  (376 MHz, Chloroform-*d*)  $\delta$  -117.04.

(Known compound: *Org. Process Res. Dev.* **2020**, 24, 1328).

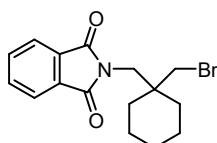

34

2-((1-(bromomethyl)cyclohexyl)methyl)isoindoline-1,3-dione

According to general procedure A: using 2-(1-((1,3-dioxoisoindolin-2-yl) methyl) cyclohexyl) acetic acid (0.3 mmol, 91 mg), 1-bromopyrrolidine-2,5-dione (0.45 mmol, 80 mg),  $\text{CeCl}_3$  (0.03 mmol, 7.4 mg), *t*-BuONa (0.09 mmol, 8.6 mg) and 3 mL  $\text{H}_2\text{O}$ . Purification by flash column chromatography (eluent: PE/EA = 50:1) gave the title compound as colorless oil (62 mg, 61% yield).

$^1\text{H NMR}$  (400 MHz, Chloroform-*d*)  $\delta$  7.89 – 7.83 (m, 2H), 7.76 – 7.70 (m, 2H), 3.70 (s, 2H), 3.53 (s, 2H), 1.72 – 1.60 (m, 4H), 1.58 – 1.43 (m, 2H), 1.41 – 1.24 (m, 4H).

$^{13}\text{C NMR}$  (101 MHz, Chloroform-*d*)  $\delta$  169.09, 134.05, 131.99, 123.34, 45.55, 41.35, 39.07, 32.46, 25.51, 21.36.

**HRMS:**  $\text{C}_{16}\text{H}_{19}\text{BrNO}_2$   $[\text{M}+\text{H}]^+$ ; calculated: 336.0599, found: 336.0596.

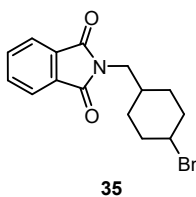

35

**2-((4-bromocyclohexyl)methyl)isoindoline-1,3-dione**

According to general procedure A: using 4-((1,3-dioxisoindolin-2-yl) methyl) cyclohexane-1-carboxylic acid (0.3 mmol, 86 mg), 1-bromopyrrolidine-2,5-dione (0.45 mmol, 80 mg),  $\text{CeCl}_3$  (0.03 mmol, 7.4 mg), *t*-BuONa (0.09 mmol, 8.6 mg) and 3 mL  $\text{H}_2\text{O}$ . Purification by flash column chromatography (eluent: PE/EA = 50:1) gave the title compound as colorless oil (72 mg, 72% yield).

**$^1\text{H}$  NMR (400 MHz, Chloroform-*d*)**  $\delta$  7.87 – 7.81 (m, 2H), 7.74 – 7.68 (m, 2H), 4.58 (p,  $J = 3.5$  Hz, 0.62 H) (major), 4.00 – 3.93 (m, 0.40) (minor), 3.61 (d,  $J = 7.3$  Hz, 1.32H) (major), 3.52 (d,  $J = 7.1$  Hz, 1H), 2.36 – 2.26 (m, 1H), 2.14 – 2.05 (m, 1H), 1.94 – 1.69 (m, 4H), 1.62 – 1.52 (m, 2H), 1.28 – 1.09 (m, 1H).

**$^1\text{H}$  NMR (400 MHz, Chloroform-*d*)**  $\delta$  7.87 – 7.81 (m, 2H), 7.74 – 7.68 (m, 2H), 4.58 (p,  $J = 3.5$  Hz, 0.62 H) (major), 4.00 – 3.93 (m, 0.40) (minor), 3.61 (d,  $J = 7.3$  Hz, 1.32H) (major), 3.52 (d,  $J = 7.1$  Hz, 0.76H) (minor), 2.36 – 2.26 (m, 1H), 2.14 – 2.05 (m, 1H), 1.94 – 1.69 (m, 4H), 1.62 – 1.52 (m, 2H), 1.28 – 1.09 (m, 1H).

**$^{13}\text{C}$  NMR (101 MHz, Chloroform-*d*)**  $\delta$  168.62 (major), 168.57 (minor), 134.03 (minor), 133.97 (major), 132.00 (major), 131.93 (minor), 123.31 (minor), 123.27 (major), 53.67, 51.36, 43.35 (major), 43.30 (minor), 37.17, 36.04, 35.62, 33.96, 31.31, 25.40.

**HRMS:**  $\text{C}_{15}\text{H}_{17}\text{BrNO}_2$  [ $\text{M}+\text{H}$ ] $^+$ ; calculated: 322.0442, found: 322.0440.

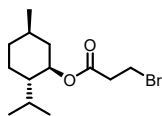

36

**(1*R*,2*S*,5*R*)-2-isopropyl-5-methylcyclohexyl 3-bromopropanoate**

According to general procedure A: using monomethylsuccinate (0.3 mmol, 77 mg), 1-bromopyrrolidine-2,5-dione (0.45 mmol, 80 mg),  $\text{CeCl}_3$  (0.03 mmol, 7.4 mg), *t*-BuONa (0.09 mmol, 8.6 mg) and 3 mL  $\text{H}_2\text{O}$ . Purification by flash column chromatography (eluent: PE/EA = 100:1) gave the title compound as colorless oil (68 mg, 78% yield).

**$^1\text{H}$  NMR (400 MHz, Chloroform-*d*)**  $\delta$  4.74 (td,  $J = 10.8, 4.0$  Hz, 1H), 3.58 (t,  $J = 6.7$  Hz, 2H), 2.89 (t,  $J = 6.9$  Hz, 2H), 2.04 – 1.83 (m, 2H), 1.72 – 1.64 (m, 2H), 1.55 – 1.32 (m, 2H), 1.30 – 1.15 (m, 1H), 1.11 – 0.96 (m, 2H), 0.92 – 0.87 (m, 6H), 0.76 (d,  $J = 7.0$  Hz, 3H).

**$^{13}\text{C}$  NMR (101 MHz, Chloroform-*d*)**  $\delta$  170.09, 46.96, 40.85, 38.13, 34.20, 31.40, 26.26, 23.36, 22.01, 20.76, 16.28.

**HRMS:**  $\text{C}_{13}\text{H}_{23}\text{BrNaO}_2$  [ $\text{M}+\text{Na}$ ] $^+$ ; calculated: 313.0779, found: 313.0775.

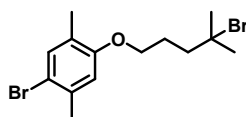

37

**1-bromo-4-((4-bromo-4-methylpentyl)oxy)-2,5-dimethylbenzene**

According to general procedure A: using gemfibrozil (0.3 mmol, 99 mg), 1-bromopyrrolidine-2,5-dione (0.45 mmol, 80 mg),  $\text{CeCl}_3$  (0.03 mmol, 7.4 mg), *t*-BuONa (0.09 mmol, 8.6 mg) and 3 mL  $\text{H}_2\text{O}$ .

Purification by flash column chromatography (eluent: PE/EA = 100:1) gave the title compound as colorless oil (69 mg, 63% yield).

**<sup>1</sup>H NMR (400 MHz, Chloroform-*d*)**  $\delta$  7.28 (s, 1H), 6.70 (s, 1H), 3.98 (t, *J* = 6.1 Hz, 2H), 2.36 (s, 3H), 2.18 (s, 3H), 1.91 – 1.84 (m, 2H), 1.81 – 1.76 (m, 2H), 1.29 (s, 6H).

**<sup>13</sup>C NMR (101 MHz, Chloroform-*d*)**  $\delta$  156.18, 135.68, 133.70, 126.27, 114.74, 113.75, 82.51, 68.49, 34.47, 24.00, 23.91, 22.89, 15.51.

**HRMS:** C<sub>15</sub>H<sub>21</sub>Br<sub>2</sub>O<sub>3</sub> [M+HCOO]<sup>-</sup>; calculated: 408.9837, found: 408.9832.

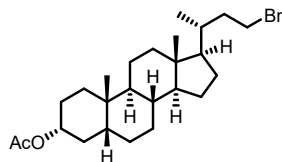

**38**  
3 $\alpha$ -Acetoxy-23-bromo-5 $\beta$ -norcholeane

According to general procedure A: using 3-acetylithocholic acid (0.3 mmol, 126 mg), 1-bromopyrrolidine-2,5-dione (0.45 mmol, 80 mg), CeCl<sub>3</sub> (0.03 mmol, 7.4 mg), *t*-BuONa (0.09 mmol, 8.6 mg) and 3 mL H<sub>2</sub>O. Purification by flash column chromatography (eluent: PE/EA = 50:1) gave the title compound as white solid (96 mg, 71% yield).

**<sup>1</sup>H NMR (400 MHz, Chloroform-*d*)**  $\delta$  4.72 (tt, *J* = 11.6, 6.3, 5.5 Hz, 1H), 3.55 – 3.44 (m, 1H), 3.42 – 3.29 (m, 1H), 2.06 – 1.92 (m, 5H), 1.89 – 1.77 (m, 4H), 1.71 – 1.65 (m, 1H), 1.61 – 1.35 (m, 10H), 1.29 – 1.20 (m, 3H), 1.18 – 1.00 (m, 6H), 0.92 (s, 6H), 0.66 (s, 3H).

**<sup>13</sup>C NMR (101 MHz, Chloroform-*d*)**  $\delta$  170.65, 74.40, 56.51, 56.13, 42.86, 41.89, 40.41, 40.16, 39.34, 35.78, 35.11, 35.04, 34.60, 32.26, 32.10, 28.25, 27.02, 26.65, 26.32, 24.17, 23.35, 21.51, 20.83, 18.11, 12.04.

(Known compound: *Org. Process Res. Dev.* **2020**, 24, 1328).

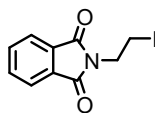

**39**  
2-(2-iodoethyl)isoindoline-1,3-dione

According to general procedure B: using 3-(1,3-dioxisoindolin-2-yl) propanoic acid (0.3 mmol, 66 mg), 1-iodopyrrolidine-2,5-dione (0.45 mmol, 101 mg), CeCl<sub>3</sub> (0.03 mmol, 7.4 mg), *t*-BuONa (0.09 mmol, 8.6 mg) and 3 mL H<sub>2</sub>O. Purification by flash column chromatography (eluent: PE/EA = 50:1) gave the title compound as white solid (70 mg, 78% yield).

**<sup>1</sup>H NMR (400 MHz, Chloroform-*d*)**  $\delta$  7.93 – 7.82 (m, 2H), 7.79 – 7.69 (m, 2H), 4.08 (t, *J* = 7.2 Hz, 2H), 3.40 (t, *J* = 7.3 Hz, 2H).

**<sup>13</sup>C NMR (101 MHz, Chloroform-*d*)**  $\delta$  167.67, 134.26, 131.85, 123.55, 40.06.

(Known compound: *Org. Biomol. Chem.* **2021**, 19, 6160).

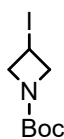

**40**  
*tert*-butyl 3-iodoazetidine-1-carboxylate

According to general procedure B: using 1-(*tert*-butoxycarbonyl) azetidine-3-carboxylic acid (0.3

mmol, 60 mg), 1-iodopyrrolidine-2,5-dione (0.45 mmol, 101 mg), CeCl<sub>3</sub> (0.03 mmol, 7.4 mg), *t*-BuONa (0.09 mmol, 8.6 mg) and 3 mL H<sub>2</sub>O. Purification by flash column chromatography (eluent: PE/EA = 100:1) gave the title compound as colorless oil (54 mg, 63% yield).

**<sup>1</sup>H NMR (400 MHz, Chloroform-*d*)** δ 4.66 – 4.58 (m, 2H), 4.49 – 4.41 (m, 1H), 4.30 – 4.23 (m, 2H), 1.42 (s, 9H).

**<sup>13</sup>C NMR (101 MHz, Chloroform-*d*)** δ 155.57, 80.13, 61.56, 28.32, 2.63.

(Known compound: *Org. Lett.* **2019**, 21, 2285).

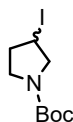

**41**

*tert*-butyl 3-iodopyrrolidine-1-carboxylate

According to general procedure B: using 1-(*tert*-butoxycarbonyl) pyrrolidine-3-carboxylic acid (0.3 mmol, 65 mg), 1-iodopyrrolidine-2,5-dione (0.45 mmol, 101 mg), CeCl<sub>3</sub> (0.03 mmol, 7.4 mg), *t*-BuONa (0.09 mmol, 8.6 mg) and 3 mL H<sub>2</sub>O. Purification by flash column chromatography (eluent: PE/EA = 100:1) gave the title compound as colorless oil (56 mg, 63% yield).

**<sup>1</sup>H NMR (400 MHz, Chloroform-*d*)** δ 4.44 – 4.27 (m, 1H), 3.87 – 3.72 (m, 1.41H), 3.72 – 3.62 (m, 0.58H), 3.61 – 3.50 (m, 1H), 3.47 – 3.35 (m, 1H), 2.34 – 2.13 (m, 2H), 1.46 (s, 9H).

**<sup>13</sup>C NMR (101 MHz, Chloroform-*d*)** δ [154.27, 154.12], [79.78, 79.72], [57.39, 57.06], [45.07, 44.75], [38.39, 37.61], 28.48, 19.97.

(Known compound: *Org. Lett.* **2019**, 21, 2285).

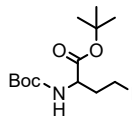

**42**

*tert*-butyl 2-((*tert*-butoxycarbonyl)amino)-4-iodobutanoate

According to general procedure B: using 5-(*tert*-butoxy)-4-((*tert*-butoxycarbonyl) amino)-5-oxopentanoic acid (0.3 mmol, 91 mg), 1-iodopyrrolidine-2,5-dione (0.45 mmol, 101 mg), CeCl<sub>3</sub> (0.03 mmol, 7.4 mg), *t*-BuONa (0.09 mmol, 8.6 mg) and 3 mL H<sub>2</sub>O. Purification by flash column chromatography (eluent: PE/EA = 100:1) gave the title compound as colorless oil (71 mg, 62% yield).

**<sup>1</sup>H NMR (400 MHz, Chloroform-*d*)** δ 5.22 – 4.98 (m, 1H), 4.23 – 4.10 (m, 1H), 3.20 – 3.08 (m, 2H), 2.43 – 2.27 (m, 1H), 2.19 – 2.07 (m, 1H), 1.45 (s, 9H), 1.43 (s, 9H).

**<sup>13</sup>C NMR (101 MHz, Chloroform-*d*)** δ 170.59, 155.34, 82.49, 79.98, 54.98, 37.66, 28.32, 27.99, -0.44.

(Known compound: *J. Med. Chem.* **2022**, 65, 9750).

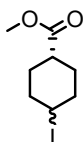

**43**

methyl 4-iodocyclohexane-1-carboxylate

According to general procedure B: using 4-(methoxycarbonyl) cyclohexane-1-carboxylic acid (0.3 mmol, 56 mg), 1-iodopyrrolidine-2,5-dione (0.45 mmol, 101 mg), CeCl<sub>3</sub> (0.03 mmol, 7.4 mg), *t*-

BuONa (0.09 mmol, 8.6 mg) and 3 mL H<sub>2</sub>O. Purification by flash column chromatography (eluent: PE/EA = 100:1) gave the title compound as colorless oil (58 mg, 72% yield).

**<sup>1</sup>H NMR (400 MHz, Chloroform-*d*)** δ 4.69 – 4.60 (m, 0.64H) (major), 4.21 – 4.06 (m, 0.38H) (minor), 3.68 (d, *J* = 16.7 Hz, 3H), 2.43 – 2.38 (m, 1H), 2.17 – 1.88 (m, 4H), 1.88 – 1.49 (m, 4H).

**<sup>13</sup>C NMR (101 MHz, Chloroform-*d*)** δ 175.63 (minor), 175.19 (major), 51.75 (major), 51.74 (minor), 41.49 (minor), 41.39 (major), 38.78, 35.88, 32.61, 30.63, 28.06, 26.15.

(Known compound: *Angew. Chem., Int. Ed.* **2018**, 57, 5492).

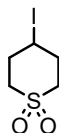

**44**

4-iodotetrahydro-2H-thiopyran 1,1-dioxide

According to general procedure B: using tetrahydro-2H-thiopyran-4-carboxylic acid 1,1-dioxide (0.3 mmol, 54 mg), 1-iodopyrrolidine-2,5-dione (0.45 mmol, 101 mg), CeCl<sub>3</sub> (0.03 mmol, 7.4 mg), *t*-BuONa (0.09 mmol, 8.6 mg) and 3 mL H<sub>2</sub>O. Purification by flash column chromatography (eluent: PE) gave the title compound as white solid (59 mg, 76% yield).

**<sup>1</sup>H NMR (400 MHz, Chloroform-*d*)** δ 4.66 (p, *J* = 4.2 Hz, 1H), 3.43 – 3.29 (m, 2H), 3.08 – 2.94 (m, 2H), 2.48 (q, *J* = 4.4 Hz, 4H).

**<sup>13</sup>C NMR (101 MHz, Chloroform-*d*)** δ 50.36, 35.33, 24.62.

(Known compound: *PCT Int. Appl.* **2011**, 2011128455).

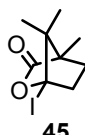

**45**

(1*S*,4*R*)-1-iodo-4,7,7-trimethyl-2-oxabicyclo[2.2.1]heptan-3-one

According to general procedure B: using camphorsulfonic acid (0.3 mmol, 59 mg), 1-iodopyrrolidine-2,5-dione (0.45 mmol, 101 mg), CeCl<sub>3</sub> (0.03 mmol, 7.4 mg), *t*-BuONa (0.09 mmol, 8.6 mg) and 3 mL H<sub>2</sub>O. Purification by flash column chromatography (eluent: PE/EA = 100:1) gave the title compound as white solid (65 mg, 77% yield).

**<sup>1</sup>H NMR (400 MHz, Chloroform-*d*)** δ 2.53 – 2.38 (m, 2H), 1.88 – 1.79 (m, 1H), 1.75 – 1.67 (m, 1H), 1.20 (s, 3H), 1.00 (s, 3H), 0.86 (s, 3H).

**<sup>13</sup>C NMR (101 MHz, Chloroform-*d*)** δ 177.52, 56.43, 49.58, 40.70, 30.13, 18.86, 17.50, 10.62.

(Known compound: *PCT Int. Appl.* **2015**, 2015068159).

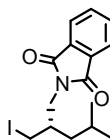

**46**

(*S*)-2-(2-(iodomethyl)-4-methylpentyl)isoindoline-1,3-dione

According to general procedure B: using (*R*)-3-((1,3-dioxoisoindolin-2-yl) methyl)-5-methylhexanoic acid (0.3 mmol, 87 mg), 1-iodopyrrolidine-2,5-dione (0.45 mmol, 101 mg), CeCl<sub>3</sub> (0.03 mmol, 7.4 mg), *t*-BuONa (0.09 mmol, 8.6 mg) and 3 mL H<sub>2</sub>O. Purification by flash column chromatography (eluent: PE/EA = 50:1) gave the title compound as yellow oil (85 mg, 76% yield).

**<sup>1</sup>H NMR (400 MHz, Chloroform-*d*)**  $\delta$  7.87 (dd,  $J = 5.5, 3.1$  Hz, 2H), 7.75 (dd,  $J = 5.4, 3.1$  Hz, 2H), 3.64 (dd,  $J = 6.8, 2.4$  Hz, 2H), 3.30 – 3.17 (m, 2H), 1.96 – 1.84 (m, 1H), 1.76 – 1.67 (m, 1H), 1.41 – 1.32 (m, 1H), 1.21 – 1.12 (m, 1H), 0.96 (d,  $J = 6.5$  Hz, 3H), 0.90 (d,  $J = 6.6$  Hz, 3H).

**<sup>13</sup>C NMR (101 MHz, Chloroform-*d*)**  $\delta$  168.50, 134.09, 131.92, 123.38, 42.72, 41.89, 36.07, 24.98, 22.95, 22.13, 12.03.

**HRMS:** C<sub>15</sub>H<sub>19</sub>INO<sub>2</sub> [M+H]<sup>+</sup>; calculated: 372.0455, found: 372.0443.

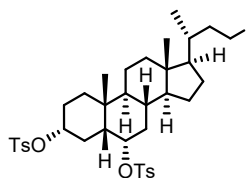

**47**

3 $\alpha$ , 6 $\alpha$ -Tos-23-iodo-5 $\beta$ -norcholane

According to general procedure B: using 3 $\alpha$ , 6 $\alpha$ -tos-hyodeoxycholic acid (0.3 mmol, 210 mg), 1-iodopyrrolidine-2,5-dione (0.45 mmol, 101 mg), CeCl<sub>3</sub> (0.03 mmol, 7.4 mg), *t*-BuONa (0.09 mmol, 8.6 mg) and 3 mL H<sub>2</sub>O. Purification by flash column chromatography (eluent: PE/EA = 50:1) gave the title compound as white solid (143 mg, 61% yield).

**<sup>1</sup>H NMR (400 MHz, Chloroform-*d*)**  $\delta$  7.78 (d,  $J = 8.0$  Hz, 2H), 7.72 (d,  $J = 7.9$  Hz, 2H), 7.34 (t,  $J = 8.0$  Hz, 4H), 4.78 (dt,  $J = 12.3, 4.9$  Hz, 1H), 4.29 (tt,  $J = 11.1, 4.6$  Hz, 1H), 3.29 (td,  $J = 9.2, 3.6$  Hz, 1H), 3.08 (q,  $J = 8.4$  Hz, 1H), 2.46 (s, 6H), 2.04 – 1.90 (m, 2H), 1.84 – 1.68 (m, 4H), 1.66 – 1.59 (m, 2H), 1.54 – 1.36 (m, 6H), 1.33 – 1.16 (m, 6H), 1.15 – 1.02 (m, 4H), 0.88 (d,  $J = 6.1$  Hz, 3H), 0.80 (s, 3H), 0.61 (s, 3H).

**<sup>13</sup>C NMR (101 MHz, Chloroform-*d*)**  $\delta$  144.71, 144.68, 134.49, 134.47, 129.85, 129.81, 127.62, 127.54, 81.76, 55.82, 55.66, 46.32, 42.93, 40.10, 39.60, 39.45, 37.03, 36.15, 34.83, 34.81, 32.09, 27.98, 27.40, 26.46, 23.90, 22.90, 21.71, 21.69, 20.52, 17.76, 11.99, 5.12.

**HRMS:** C<sub>37</sub>H<sub>52</sub>INaO<sub>6</sub>S<sub>2</sub> [M+Na]<sup>+</sup>; calculated: 805.2069, found: 805.2069.

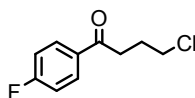

**48**

4-chloro-1-(4-fluorophenyl)butan-1-one

According to general procedure C: using 5-(4-fluorophenyl)-5-oxopentanoic acid (0.3 mmol, 63 mg), 1,3,5-trichloro-1,3,5-triazinane-2,4,6-trione (0.15 mmol, 35 mg), CeCl<sub>3</sub> (0.03 mmol, 7.4 mg), *t*-BuONa (0.09 mmol, 8.6 mg) and 3 mL H<sub>2</sub>O. Purification by flash column chromatography (eluent: PE/EA = 50:1) gave the title compound as yellow oil (43 mg, 72% yield).

**<sup>1</sup>H NMR (400 MHz, Chloroform-*d*)**  $\delta$  8.05 – 7.96 (m, 2H), 7.13 (t,  $J = 8.6$  Hz, 2H), 3.67 (t,  $J = 6.2$  Hz, 2H), 3.15 (t,  $J = 7.0$  Hz, 2H), 2.22 (p,  $J = 6.6$  Hz, 2H).

**<sup>13</sup>C NMR (101 MHz, Chloroform-*d*)**  $\delta$  197.34, 165.82 (d,  $J = 254.9$  Hz), 133.19 (d,  $J = 3.0$  Hz), 130.66 (d,  $J = 9.2$  Hz), 115.76 (d,  $J = 21.8$  Hz), 44.64, 35.19, 26.69.

**<sup>19</sup>F NMR (376 MHz, Chloroform-*d*)**  $\delta$  -105.03.

(Known compound: *J. Am. Chem. Soc.* **2022**, 144, 13895).

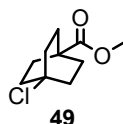

49  
methyl 4-chlorobicyclo[2.2.2]octane-1-carboxylate

According to general procedure C: using 4-(methoxycarbonyl) bicyclo [2.2.2] octane-1-carboxylic acid (0.3 mmol, 64 mg), 1,3,5-trichloro-1,3,5-triazinane-2,4,6-trione (0.15 mmol, 35 mg), CeCl<sub>3</sub> (0.03 mmol, 7.4 mg), *t*-BuONa (0.09 mmol, 8.6 mg) and 3 mL H<sub>2</sub>O. Purification by flash column chromatography (eluent: PE/EA = 30:1) gave the title compound as colorless oil (42 mg, 69% yield).

<sup>1</sup>H NMR (400 MHz, Chloroform-*d*) δ 3.63 (s, 3H), 2.10 – 2.01 (m, 6H), 1.98 – 1.90 (m, 6H).

<sup>13</sup>C NMR (101 MHz, Chloroform-*d*) δ 177.07, 66.23, 51.86, 37.51, 35.54, 30.36.

(Known compound: *J. Org. Chem.* **1985**, 50, 1079).

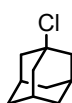

50  
(3s,5s,7s)-1-chloroadamantane

According to general procedure C: using (3*r*,5*r*,7*r*)-adamantane-1-carboxylic acid (0.3 mmol, 54 mg), 1,3,5-trichloro-1,3,5-triazinane-2,4,6-trione (0.15 mmol, 35 mg), CeCl<sub>3</sub> (0.03 mmol, 7.4 mg), *t*-BuONa (0.09 mmol, 8.6 mg) and 3 mL H<sub>2</sub>O. Purification by flash column chromatography (eluent: PE) gave the title compound as colorless oil (36 mg, 70% yield).

<sup>1</sup>H NMR (400 MHz, Chloroform-*d*) δ 2.14 (s, 9H), 1.67 (s, 6H).

<sup>13</sup>C NMR (101 MHz, Chloroform-*d*) δ 68.94, 47.75, 35.59, 31.72.

(Known compound: *Chem. Eur. J.* **2016**, 22, 9971).

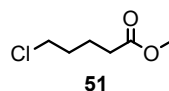

51  
methyl 5-chloropentanoate

According to general procedure C: using 6-methoxy-6-oxohexanoic acid (0.3 mmol, 48 mg), 1,3,5-trichloro-1,3,5-triazinane-2,4,6-trione (0.15 mmol, 35 mg), CeCl<sub>3</sub> (0.03 mmol, 7.4 mg), *t*-BuONa (0.09 mmol, 8.6 mg) and 3 mL H<sub>2</sub>O. Purification by flash column chromatography (eluent: PE) gave the title compound as colorless oil (28 mg, 62% yield).

<sup>1</sup>H NMR (400 MHz, Chloroform-*d*) δ 3.67 (s, 3H), 3.54 (t, *J* = 6.3 Hz, 2H), 2.35 (t, *J* = 6.7 Hz, 2H), 1.87 – 1.72 (m, 4H).

<sup>13</sup>C NMR (101 MHz, Chloroform-*d*) δ 173.63, 51.61, 44.45, 33.18, 31.84, 22.23.

(Known compound: *Russ. Chem. Bull.* **2004**, 53, 2200).

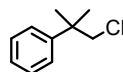

52  
(1-chloro-2-methylpropan-2-yl)benzene

According to general procedure C: using 6-methoxy-6-oxohexanoic acid (0.3 mmol, 54 mg), 1,3,5-trichloro-1,3,5-triazinane-2,4,6-trione (0.15 mmol, 35 mg), CeCl<sub>3</sub> (0.03 mmol, 7.4 mg), *t*-BuONa (0.09 mmol, 8.6 mg) and 3 mL H<sub>2</sub>O. Purification by flash column chromatography (eluent: PE) gave the title compound as colorless oil (31 mg, 61% yield).

**<sup>1</sup>H NMR (400 MHz, Chloroform-*d*)**  $\delta$  7.45 – 7.35 (m, 4H), 7.31 – 7.26 (m, 1H), 3.70 (s, 2H), 1.48 (s, 6H).

**<sup>13</sup>C NMR (101 MHz, Chloroform-*d*)**  $\delta$  146.03, 128.35, 126.50, 125.93, 56.36, 39.80, 26.45.

(Known compound: *Org. Lett.* **2017**, 19, 4560).



## VI. Application of the methodology

### Gram-scale synthesis

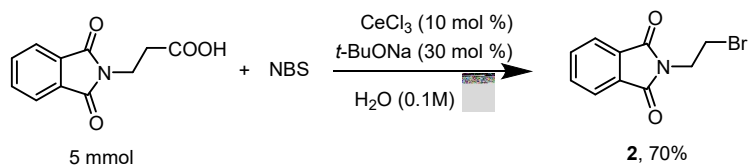

In a dry 100 mL round-bottom flask was added 3-(1,3-dioxoisindolin-2-yl) propanoic acid (5 mmol), 1-bromopyrrolidine-2,5-dione (7.5 mmol) in 20 mL H<sub>2</sub>O under air atmosphere. The resulting solution was stirred for 12 h at room temperature under 100W Blue lights. On completion, the resulting solution was diluted with DCM (30 mL). Then, poured into an extraction funnel, the organic phase was washed with brine (1 x 20 mL), dried over Na<sub>2</sub>SO<sub>4</sub> and concentrated under reduced pressure. Purification by flash column chromatography with PE/EA (100/1) as eluent gave the compound **37** as white solid (0.889 g, 70% yield)

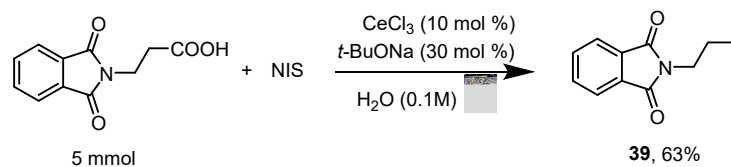

In a dry 100 mL round-bottom flask was added 5-(4-fluorophenyl)-5-oxopentanoic acid (5 mmol), 1,3,5-trichloro-1,3,5-triazinane-2,4,6-trione (2.5 mmol) in 20 mL H<sub>2</sub>O under air atmosphere. The resulting solution was stirred for 12 h at room temperature under 100W Blue lights. On completion, the resulting solution was diluted with DCM (30 mL). Then, poured into an extraction funnel, the organic phase was washed with brine (1 x 20 mL), dried over Na<sub>2</sub>SO<sub>4</sub> and concentrated under reduced pressure. Purification by flash column chromatography with PE/EA (100/1) as eluent gave the compound **46** as yellow oil (0.948 g, 63% yield)

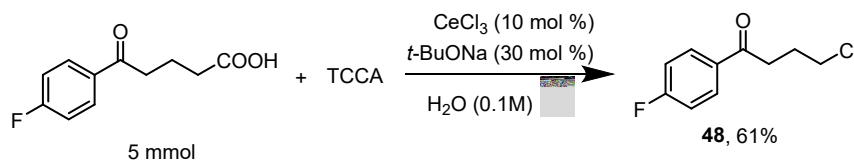

In a dry 100 mL round-bottom flask was added 3-(1,3-dioxoisindolin-2-yl) propanoic acid (5 mmol), 1-iodopyrrolidine-2,5-dione (7.5 mmol) in 20 mL H<sub>2</sub>O under air atmosphere. The resulting solution was stirred for 12 h at room temperature under 100W Blue lights. On completion, the resulting solution was diluted with DCM (30 mL). Then, poured into an extraction funnel, the organic phase was washed with brine (1 x 20 mL), dried over Na<sub>2</sub>SO<sub>4</sub> and concentrated under reduced pressure. Purification by flash column chromatography with PE/EA (100/1) as eluent gave the compound **2** as white solid (0.662 g, 61% yield)

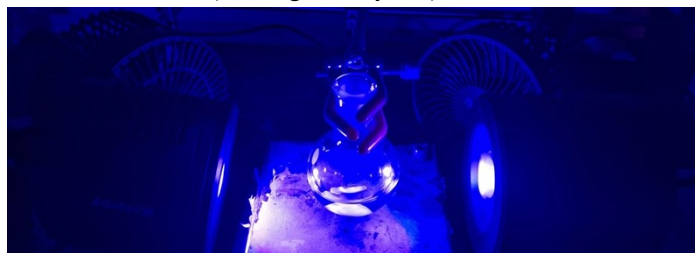

**Figure S3.** 100 W blue LED light setup for gram-scale reaction.

## Synthesis of drug<sup>6</sup>

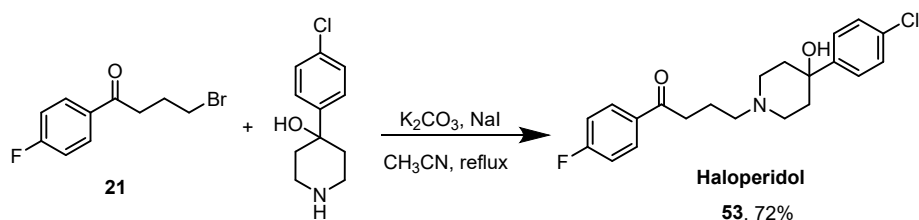

In a dry 100 mL round-bottom flask were added 4-bromo-1-(4-fluorophenyl) butan-1-one **20** (1 mmol, 1.0 equiv.), 4-(4-chlorophenyl) piperidin-4-ol (1.5 mmol, 1.5 equiv.), NaI (15 mg, 0.1 mmol, 0.1 equiv), K<sub>2</sub>CO<sub>3</sub> (207 mg, 1.5 mmol, 1.5 equiv.), and anhydrous MeCN (20 mL) in an N<sub>2</sub> glovebox. The vial was sealed and transferred out of glovebox. The reaction mixture was reflux for 4 h. After completion of the reaction, the solvent was removed under reduced pressure and the residue was purified by flash column chromatography on silica gel to afford the desired product haloperidol **51** (271 mg, 72%) (eluent: PE/EA = 1/1): yellow solid.

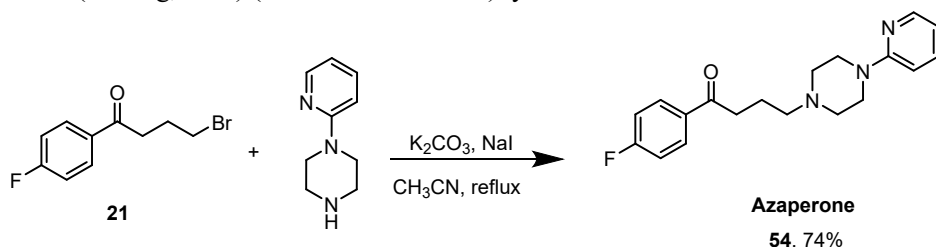

In a dry 100 mL round-bottom flask were added 4-bromo-1-(4-fluorophenyl) butan-1-one **20** (1 mmol, 1.0 equiv.), 1-(pyridin-2-yl) piperazine (1.5 mmol, 1.5 equiv.), NaI (15 mg, 0.1 mmol, 0.1 equiv), K<sub>2</sub>CO<sub>3</sub> (207 mg, 1.5 mmol, 1.5 equiv.), and anhydrous MeCN (20 mL) in an N<sub>2</sub> glovebox. The vial was sealed and transferred out of glovebox. The reaction mixture was reflux for 4 h. After completion of the reaction, the solvent was removed under reduced pressure and the residue was purified by flash column chromatography on silica gel to afford the desired product azaperone **52** (242 mg, 74%) (eluent: PE/EA = 1/1): yellow solid.

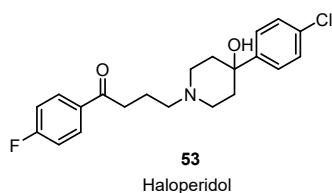

**<sup>1</sup>H NMR (400 MHz, Chloroform-*d*)**  $\delta$  8.07 – 7.99 (m, 2H), 7.43 – 7.37 (m, 2H), 7.34 – 7.29 (m, 2H), 7.19 – 7.11 (m, 2H), 3.00 (t, *J* = 7.0 Hz, 2H), 2.85 – 2.75 (m, 2H), 2.54 – 2.38 (m, 4H), 2.07 – 1.95 (m, 4H), 1.72 – 1.65 (m, 2H).

**<sup>13</sup>C NMR (101 MHz, Chloroform-*d*)**  $\delta$  198.39, 165.63 (d, *J* = 254.5 Hz), 146.94, 133.68 (d, *J* = 3.0 Hz), 132.73, 130.69 (d, *J* = 9.2 Hz), 128.37, 126.11, 115.62 (d, *J* = 21.9 Hz), 71.08, 57.85, 49.33, 38.38, 36.26, 21.90.

**<sup>19</sup>F NMR (376 MHz, Chloroform-*d*)**  $\delta$  -105.65.

(Known compound: *ACS Catal.* **2020**, 10, 7543).

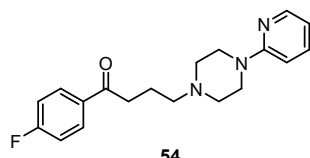

Azaperone

**<sup>1</sup>H NMR (400 MHz, Chloroform-*d*)**  $\delta$  8.17 (dd,  $J = 4.9, 1.9$  Hz, 1H), 8.00 (dd,  $J = 8.6, 5.4$  Hz, 2H), 7.52 – 7.41 (m, 1H), 7.12 (t,  $J = 8.5$  Hz, 2H), 6.68 – 6.55 (m, 2H), 3.51 (t,  $J = 5.0$  Hz, 4H), 3.01 (t,  $J = 7.0$  Hz, 2H), 2.57 (t,  $J = 5.0$  Hz, 4H), 2.48 (t,  $J = 7.1$  Hz, 2H), 2.00 (p,  $J = 7.0$  Hz, 2H).

**<sup>13</sup>C NMR (101 MHz, Chloroform-*d*)**  $\delta$  198.39, 165.66 (d,  $J = 254.3$  Hz), 159.49, 147.97, 137.44, 130.67 (d,  $J = 9.2$  Hz), 115.63 (d,  $J = 21.8$  Hz), 113.31, 107.06, 57.70, 52.89, 45.06, 36.13, 21.42.

**<sup>19</sup>F NMR (376 MHz, Chloroform-*d*)**  $\delta$  -105.58.

(Known compound: *J. Org. Chem.* **2019**, 84, 15315).

## VII. Control experiments

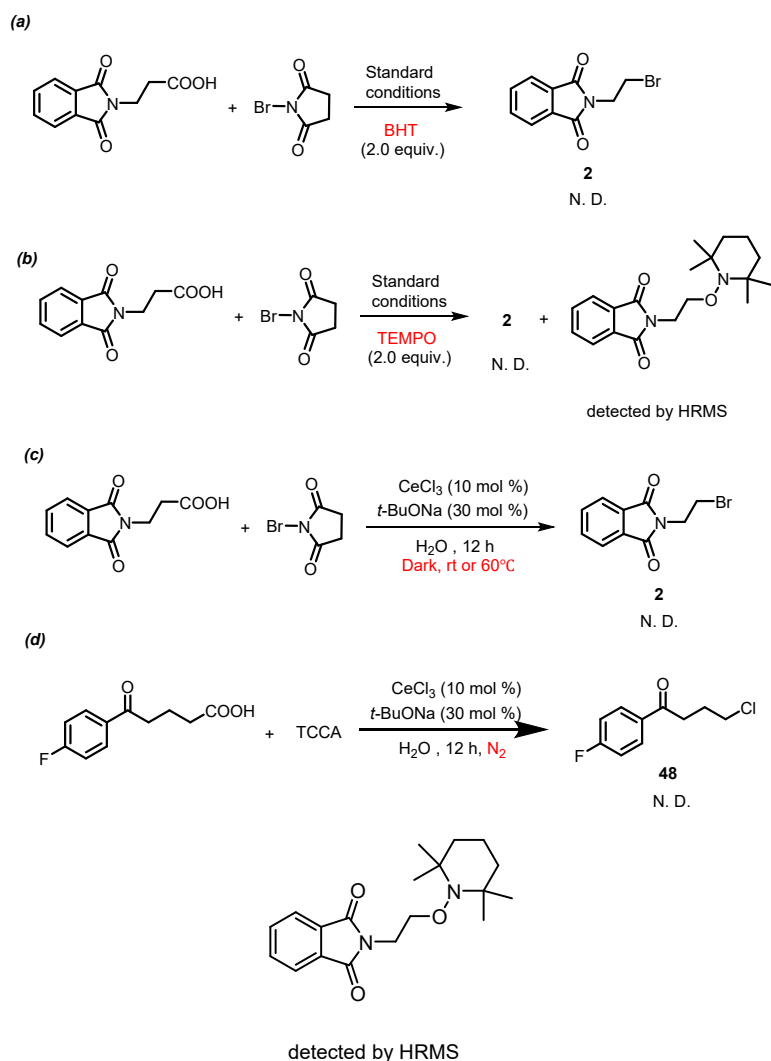

The reaction was completely inhibited by free radical inhibitors, and the radical adduct was detected by HRMS ( $[M+H]^+ = 331.2022$ )

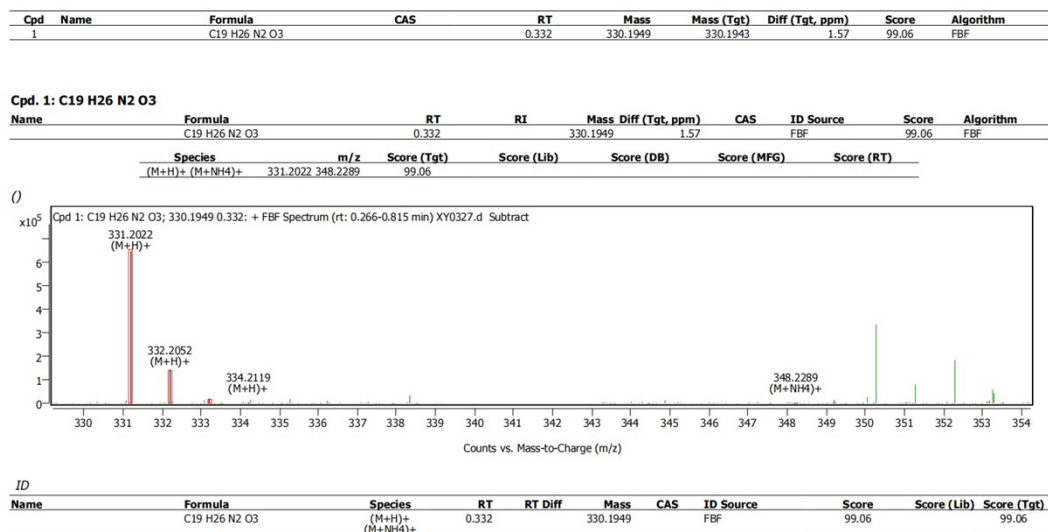

Figure S4. HRMS data of TEMPO adduct

### VIII. UV-visible absorption Spectra

UV-Vis experiments were performed to analyse the ligand-to-metal-charge-transfer (LMCT) process between cerium catalyst and alkyl carboxylic acids. For verification,  $(n\text{-Bu}_4\text{N})_2\text{Ce}^{\text{IV}}\text{Cl}_6$  was chosen as a Ce(IV) source according to one reported by Zuo et al.<sup>7</sup> In order to ensure the solubility, acetonitrile (similar yield to the model reaction) was selected as the solvent.

Preparation of a stock solution (solution A): In a glass vial equipped with a teflon-coated stirring bar and a septum,  $(n\text{-Bu}_4\text{N})_2\text{Ce}^{\text{IV}}\text{Cl}_6$  (25.1 mg, 0.03 mmol) were dissolved in MeCN (3 mL). Dilute 66  $\mu\text{L}$  of the above solution to 6 mL to obtain solution A.

Preparation of a stock solution (solution B): In a glass vial equipped with a teflon-coated stirring bar and a septum,  $(n\text{-Bu}_4\text{N})_2\text{Ce}^{\text{IV}}\text{Cl}_6$  (25.1 mg, 0.03 mmol) and 1-adamantane carboxylic acid (54.1 mg, 0.3 mmol) were dissolved in MeCN (3 mL). Dilute 66  $\mu\text{L}$  of the above solution to 6 mL to obtain solution B.

#### UV-Visible absorption spectra of solution A

UV-Vis spectra were recorded after irradiation the cuvette solution A with 100 W blue LED light.

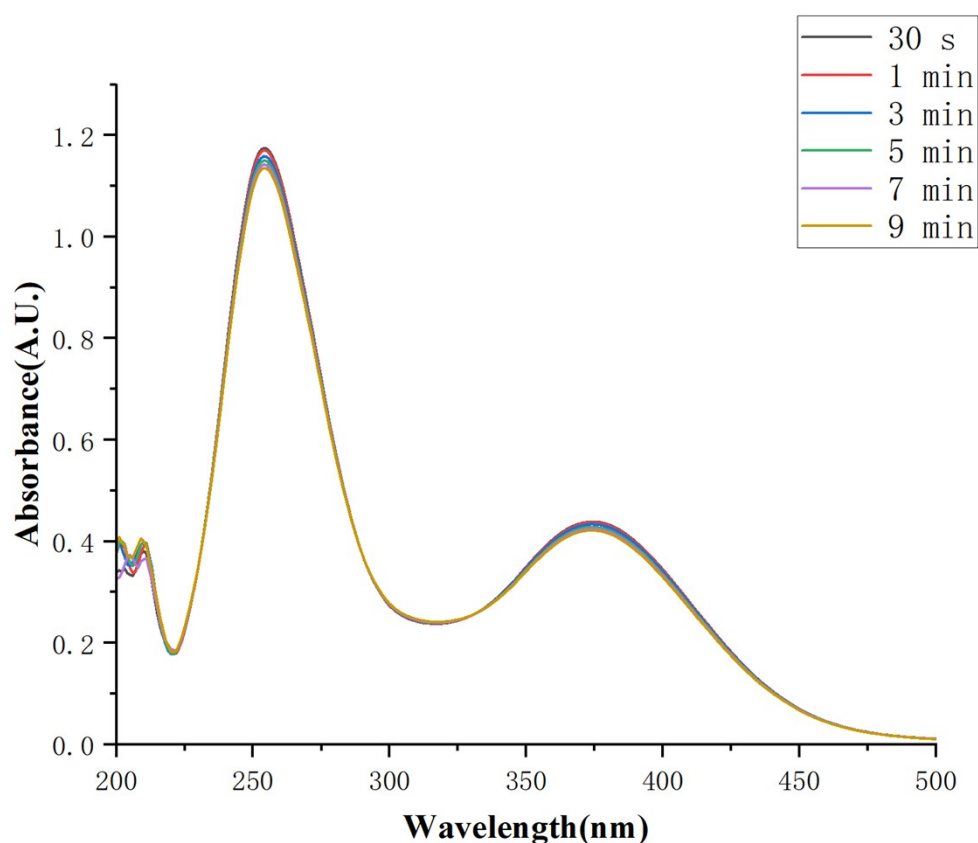

**Figure S5.** UV-Visible spectra of a solution of  $(n\text{-Bu}_4\text{N})_2\text{Ce}^{\text{IV}}\text{Cl}_6$  without acid after irradiation with 100 W blue LED light

As show in Figure S5, in the absence of acid,  $\text{Ce}^{\text{IV}}$  ( $\lambda_{\text{max}} \approx 380 \text{ nm}$ ) absorbance hardly changed with the increase of irradiation time.

### UV-Visible absorption spectra of solution B

UV-Vis spectra were recorded after irradiation the cuvette solution B with 100 W blue LED light.

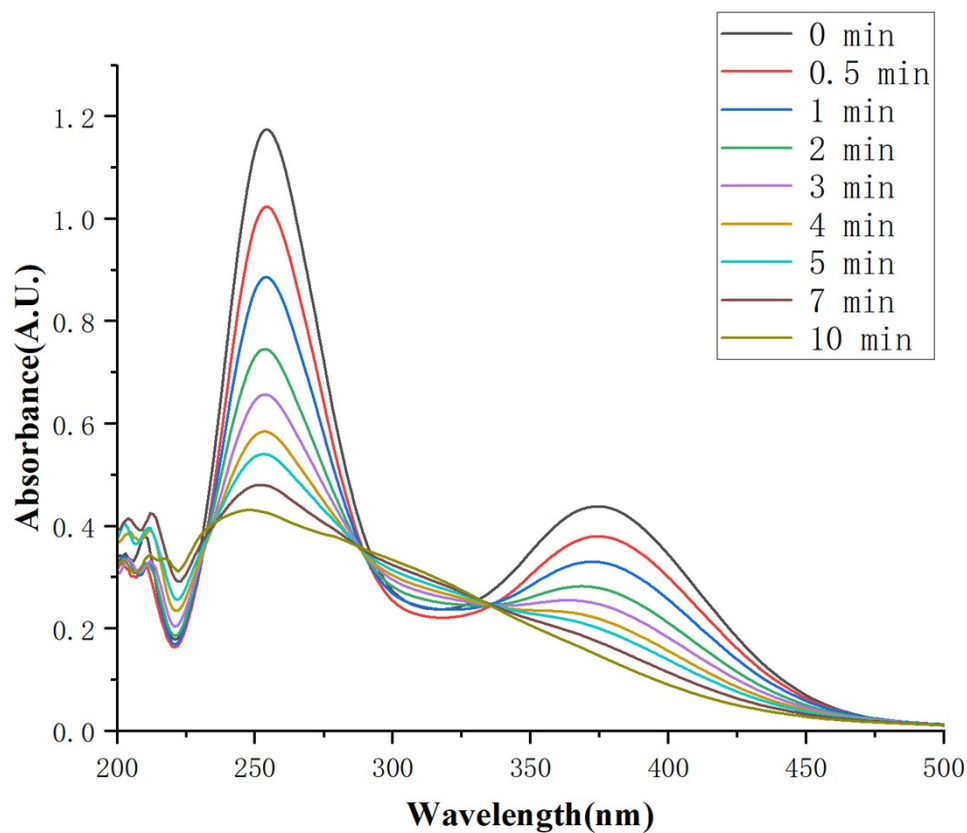

**Figure S6.** UV-Visible spectra of a solution of  $(n\text{-Bu}_4\text{N})_2\text{Ce}^{\text{IV}}\text{Cl}_6$  with acid after irradiation with 100 W blue LED light

When the 100 W blue LED was switched-on, the fast consumption of  $\text{Ce}^{\text{IV}}$  ( $\lambda_{\text{max}} \approx 380$  nm) was observed and the absorbance of  $\text{Ce}^{\text{III}}$  ( $\lambda_{\text{max}} \approx 330$  nm) gradually increases, which demonstrated that in the presence of carboxylic acid, the  $\text{Ce}^{\text{IV}}$  was rapidly reduced to  $\text{Ce}^{\text{III}}$  after gradually increasing the illumination time.

In order to investigate the effect of the strong oxidant TCCA on the reaction, the following UV-VIS experiments were performed.

Preparation of a stock solution (solution C): In a glass vial equipped with a teflon-coated stirring bar and a septum,  $\text{CeCl}_3$  (7.4 mg, 0.03 mmol) were dissolved in  $\text{H}_2\text{O}$  (3 mL). Dilute 66  $\mu\text{L}$  of the above solution to 6 mL to obtain solution C.

Preparation of a stock solution (solution D): In a glass vial equipped with a teflon-coated stirring bar and a septum, TCCA (34.9 mg, 0.15 mmol) were dissolved in  $\text{H}_2\text{O}$  (3 mL). Dilute 66  $\mu\text{L}$  of the above solution to 6 mL to obtain solution D.

Preparation of a stock solution (solution E): In a glass vial equipped with a teflon-coated stirring bar and a septum,  $\text{CeCl}_3$  (7.4 mg, 0.03 mmol), TCCA (34.9mg, 0.15 mmol) were dissolved in  $\text{H}_2\text{O}$  (3 mL). The solution was stirred for 10 h at room temperature. Dilute 66  $\mu\text{L}$  of the above solution to 6 mL to obtain solution E.

#### UV-Visible absorption spectra of solution C, solution D and solution E

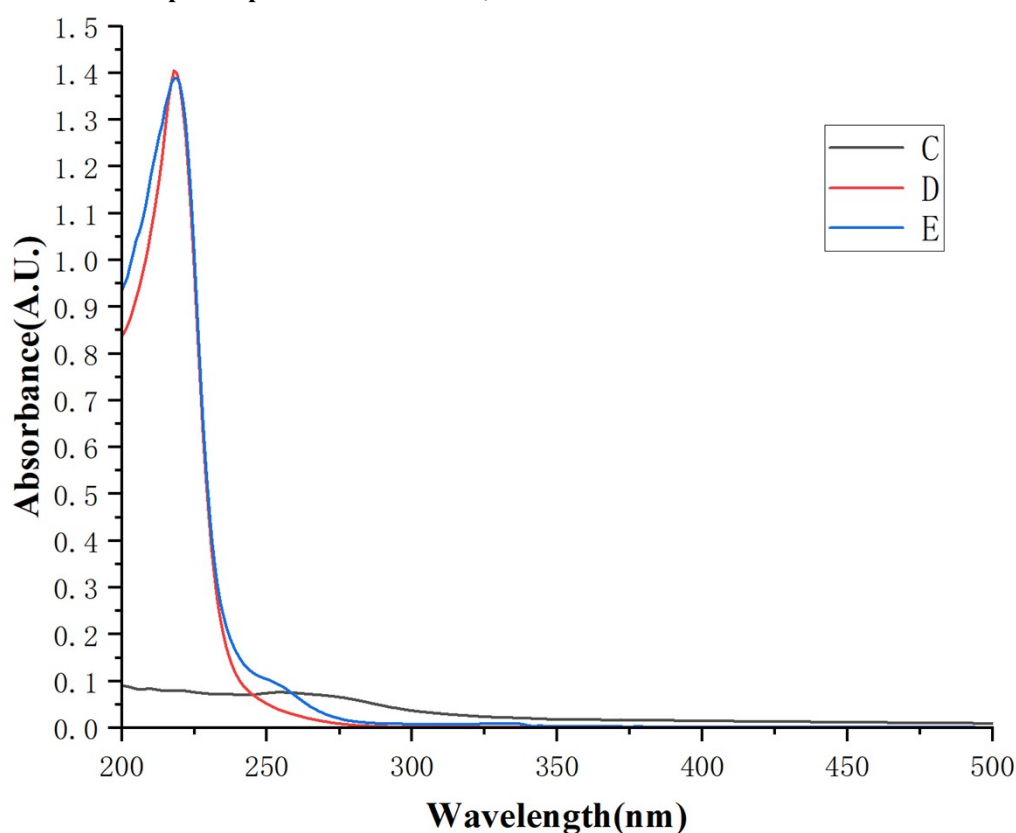

**Figure S7.** UV-Visible spectra of a solution C, solution D and solution E

As show in Figure S7, no absorption of  $\text{Ce}^{\text{IV}}$  ( $\lambda_{\text{max}} \approx 380 \text{ nm}$ ) was observed at 380 nm. Thus, it could be speculated that  $\text{Ce}^{\text{III}}$  cannot be oxidized to  $\text{Ce}^{\text{IV}}$  by TCCA.

## IX. Electron paramagnetic resonance (EPR) experiment

In order to determine the active species of oxygen involved in the present reaction, 5,5-dimethylpyrroline-N-oxide (DMPO) were employed to capture  $O_2^{\cdot-}$  ( $g = 2.0069$ ).

To a dried 8 mL vial was added 3-(1,3-dioxoisindolin-2-yl) propanoic acid (0.3 mmol), 1-bromopyrrolidine-2,5-dione (NBS) (1.0-1.5 equiv.),  $CeCl_3$  (10 mol %),  $t-BuONa$  (30 mol %), DMPO (5,5-dimethyl-1-pyrroline N-oxide, 15  $\mu$ L) in 3 mL  $H_2O$  under air atmosphere. The resulting solution was stirred under 100 W blue light for 30 min (25  $^{\circ}C$ ). After that, the solution sample was taken out into a small tube and analyzed by EPR. As show in Figure S6, there was a strong characteristic signal of  $O_2^{\cdot-}$  adduct with DMPO when the DMPO was added into model reaction.

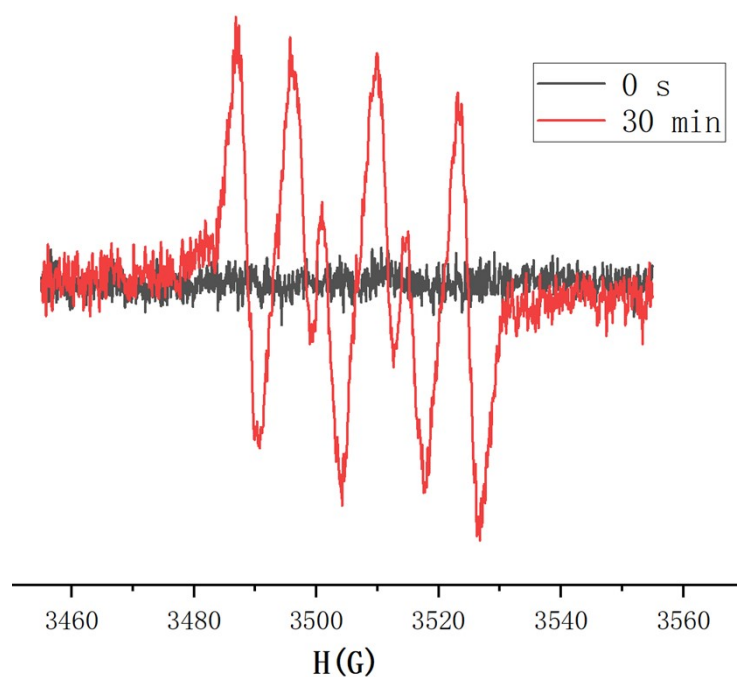

**Figure S8 .** Electron spin resonance (ESR) spectra of DMPO with  $O_2^{\cdot-}$



## X. KI-starch test for the detection of hydrogen peroxide (H<sub>2</sub>O<sub>2</sub>) in the reaction

It was anticipated that H<sub>2</sub>O<sub>2</sub> may be one of the reasonable by-products of the photo-induced halodecarboxylation reaction, which was confirmed by KI/starch test.

To a dried 8 mL vial was added 3-(1,3-dioxoisindolin-2-yl) propanoic acid (0.3 mmol), 1-bromopyrrolidine-2,5-dione (NBS) (1.0-1.5 equiv.), CeCl<sub>3</sub> (10 mol %), *t*-BuONa (30 mol %) in 3 mL H<sub>2</sub>O under air atmosphere. The resulting solution was stirred under 100 W blue light for 12 h (25 °C). After that, the KI-starch paper was immersed in the reaction solution and quickly turned into dark purple colour (Figure S7), which confirms the formation of H<sub>2</sub>O<sub>2</sub>.

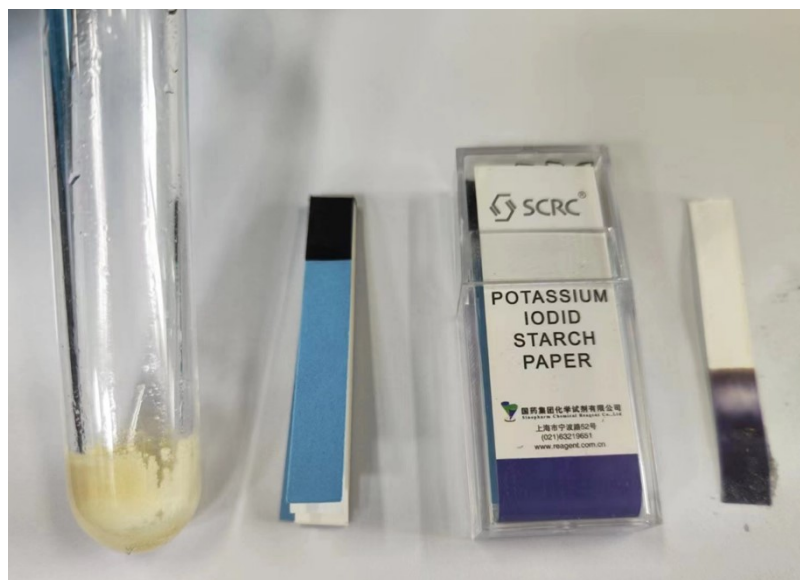

**Figure S9** . Detection of hydrogen peroxide (H<sub>2</sub>O<sub>2</sub>) using KI-starch paper

### Reference:

- 1 M. He, G. Chen, X. Huang, R. Xu, Z. Zeng and J. Yang, *Polym. Chem.*, 2014, **5**, 2951–2960.
- 2 P. H. Huy and C. Mbouhom, *Chem. Sci.*, 2019, **10**, 7399–7406.
- 3 D. Brossard, M. Lechevrel, L. El Kihel, C. Quesnelle, M. Khalid, S. Moslemi and J.-M. Reimund, *Eur. J. Med. Chem.*, 2014, **86**, 279–290.
- 4 M. D. Hill, M.-J. Blanco, F. G. Salituro, Z. Bai, J. T. Beckley, M. A. Ackley, J. Dai, J. J. Doherty, B. L. Harrison, E. C. Hoffmann, T. M. Kazdoba, D. Lanzetta, M. Lewis, M. C. Quirk and A. J. Robichaud, *J. Med. Chem.*, 2022, **65**, 9063–9075.
- 5 T.-G. Chen, H. Zhang, P. K. Mykhailiuk, R. R. Merchant, C. A. Smith, T. Qin and P. S. Baran, *Angew. Chem. Int. Ed.*, 2019, **58**, 2454–2458.
- 6 K. Wang and R. Zeng, *Org. Chem. Front.*, 2022, **9**, 3692–3696.
- 7 A. Hu, J.-J. Guo, H. Pan, H. Tang, Z. Gao and Z. Zuo, *J. Am. Chem. Soc.*, 2018, **140**, 1612–1616.

## XI. Copied of NMR spectra

### $^1\text{H}$ NMR of compound 2

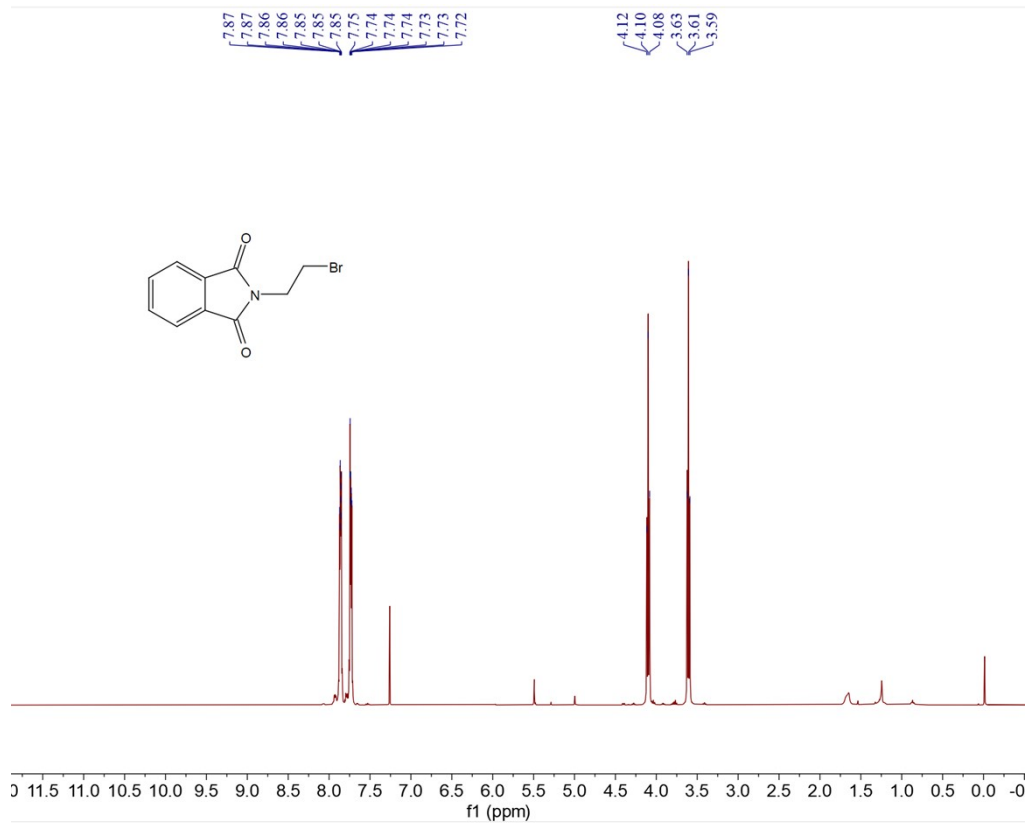

### $^{13}\text{C}$ NMR of compound 2

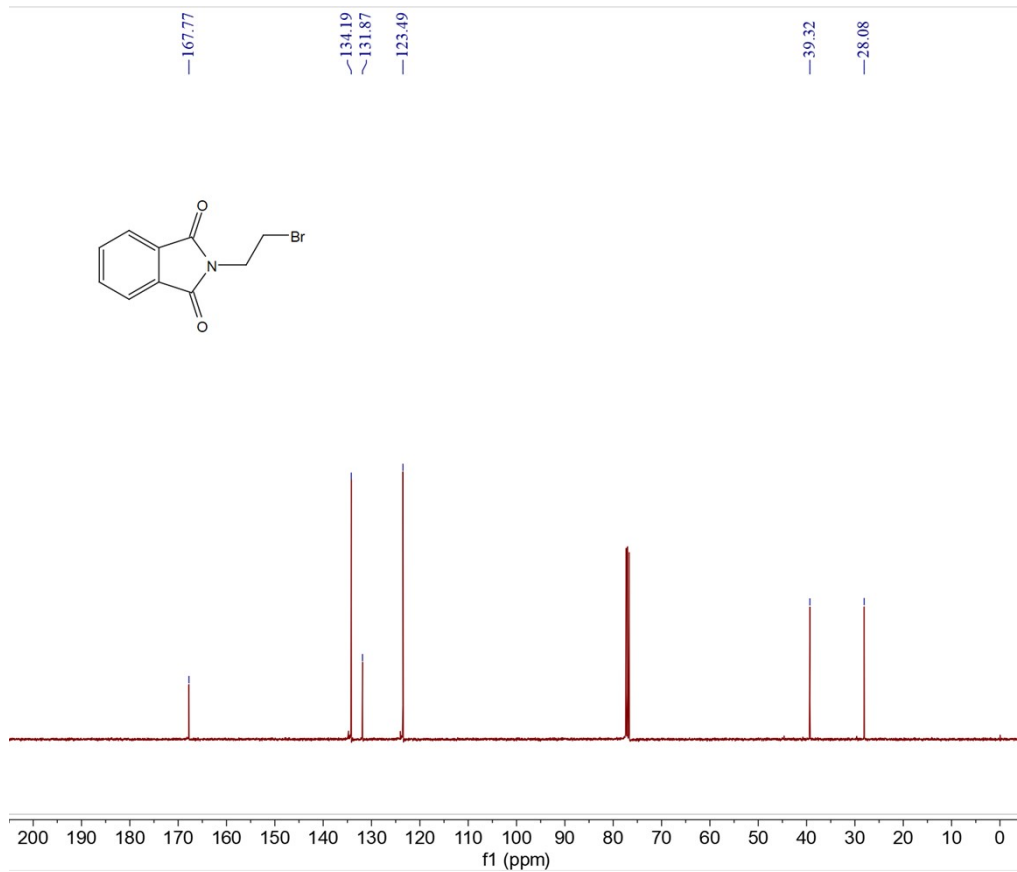

### <sup>1</sup>H NMR of compound 3

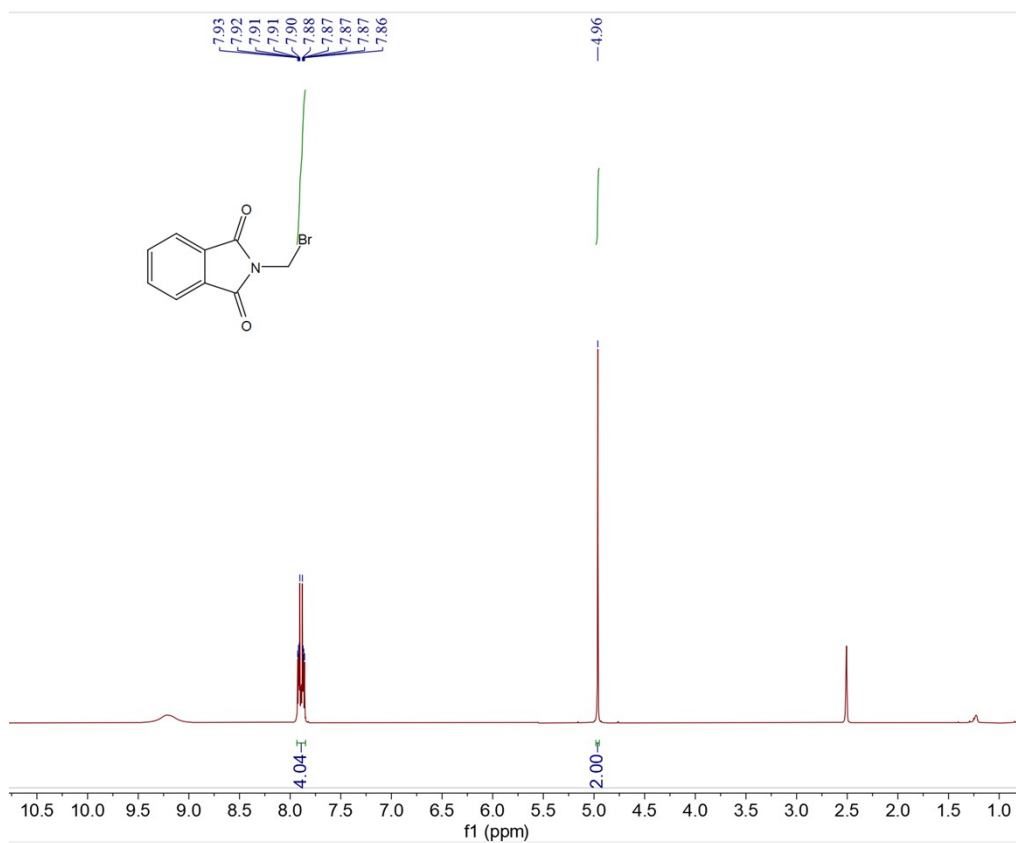

### <sup>13</sup>C NMR of compound 3

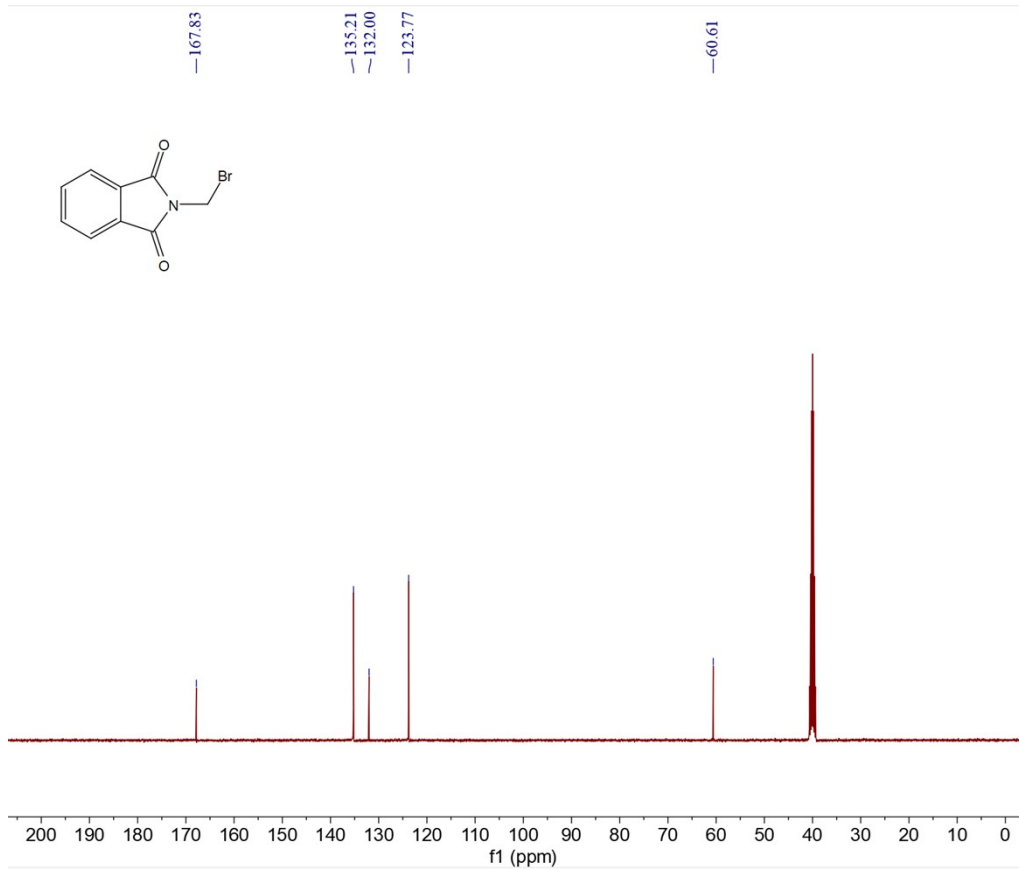

### <sup>1</sup>H NMR of compound 4

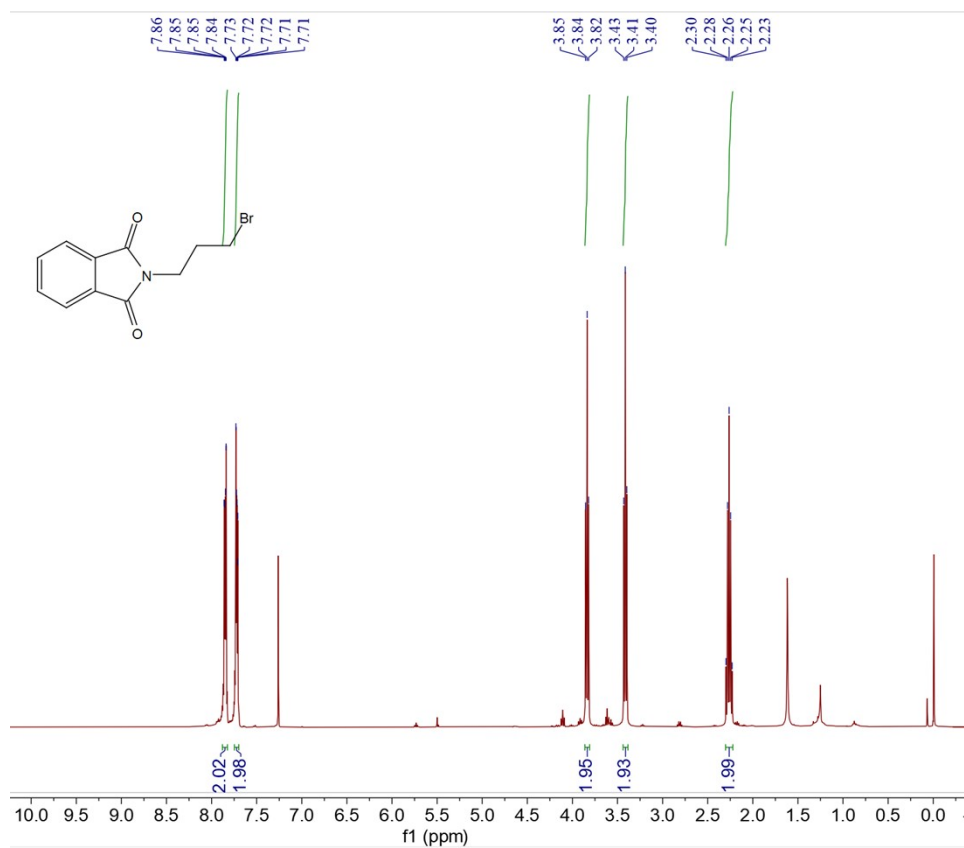

### <sup>13</sup>C NMR of compound 4

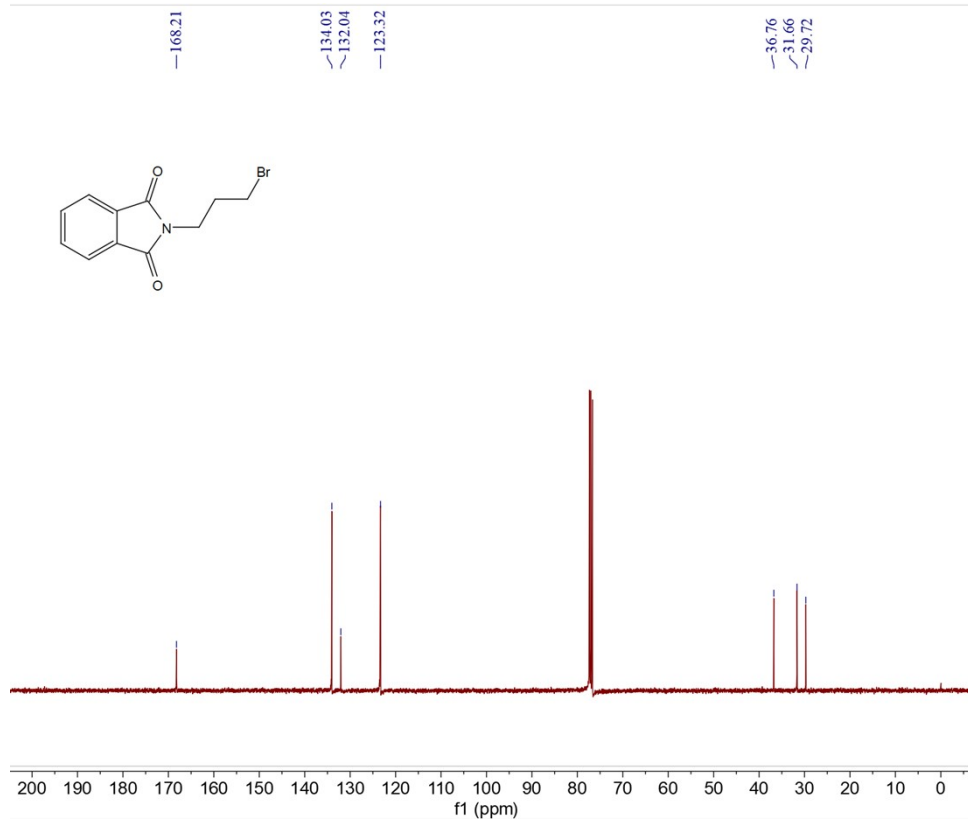

### <sup>1</sup>H NMR of compound 5

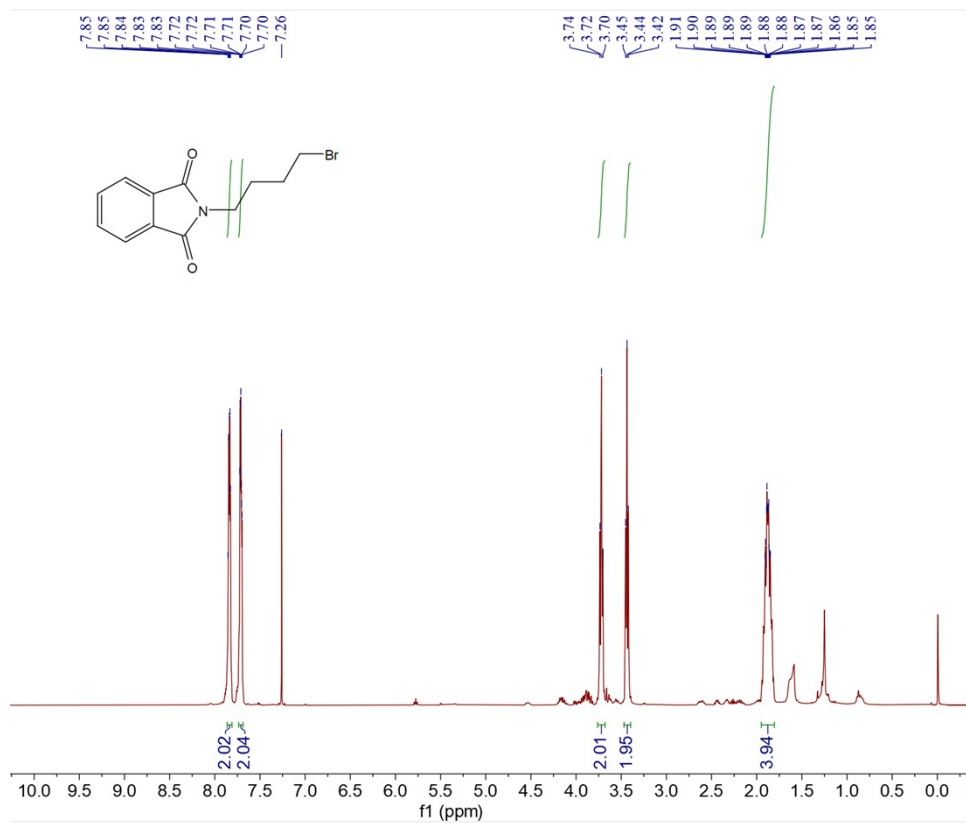

### <sup>13</sup>C NMR of compound 5

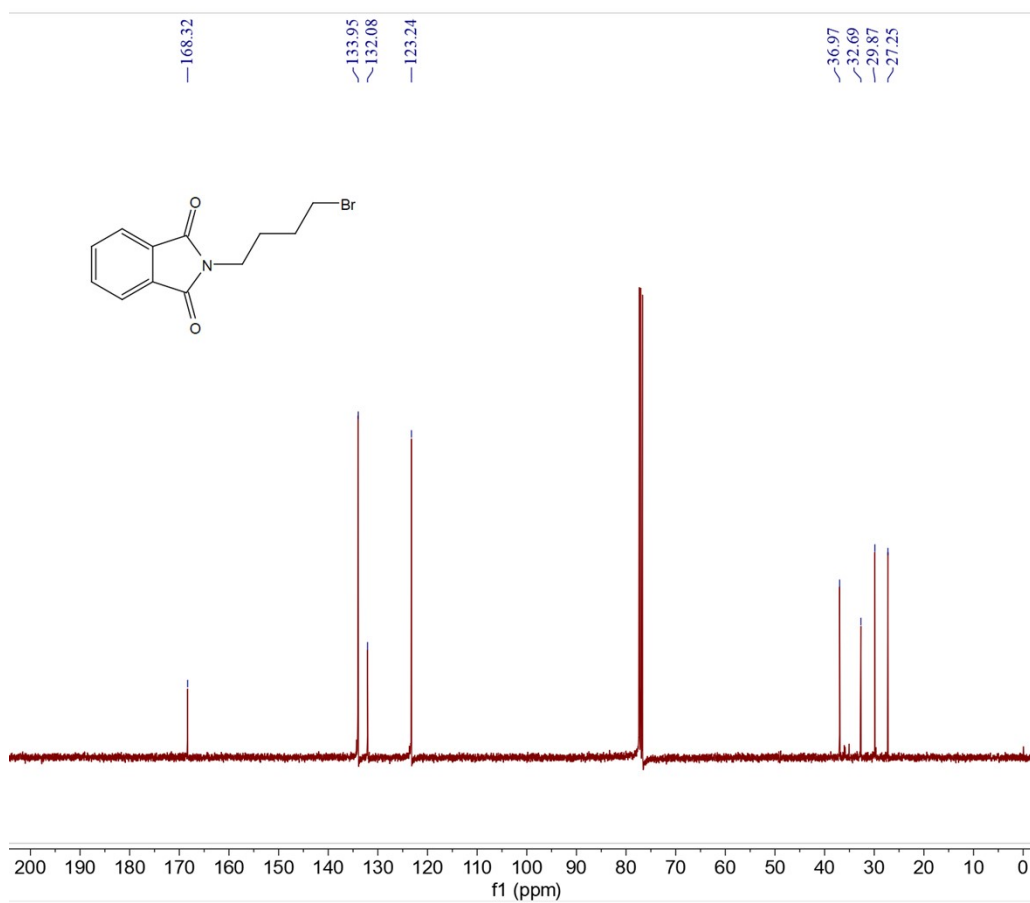

### <sup>1</sup>H NMR of compound 6

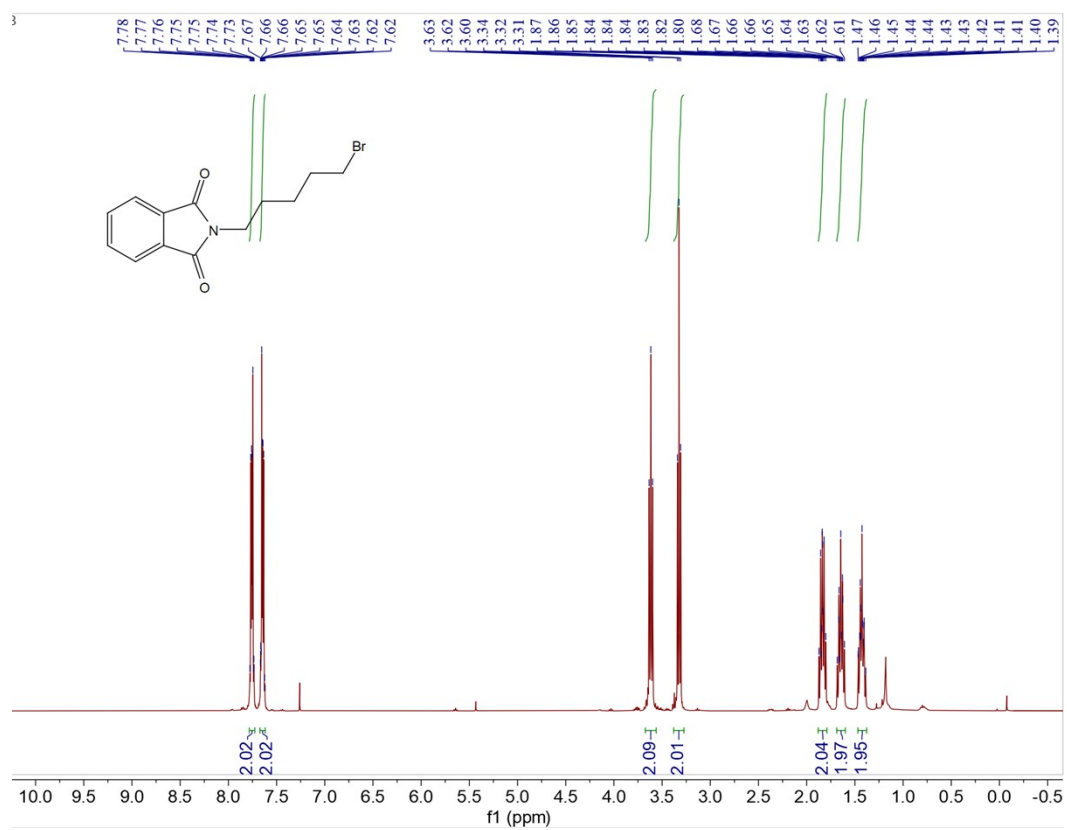

### <sup>13</sup>C NMR of compound 6

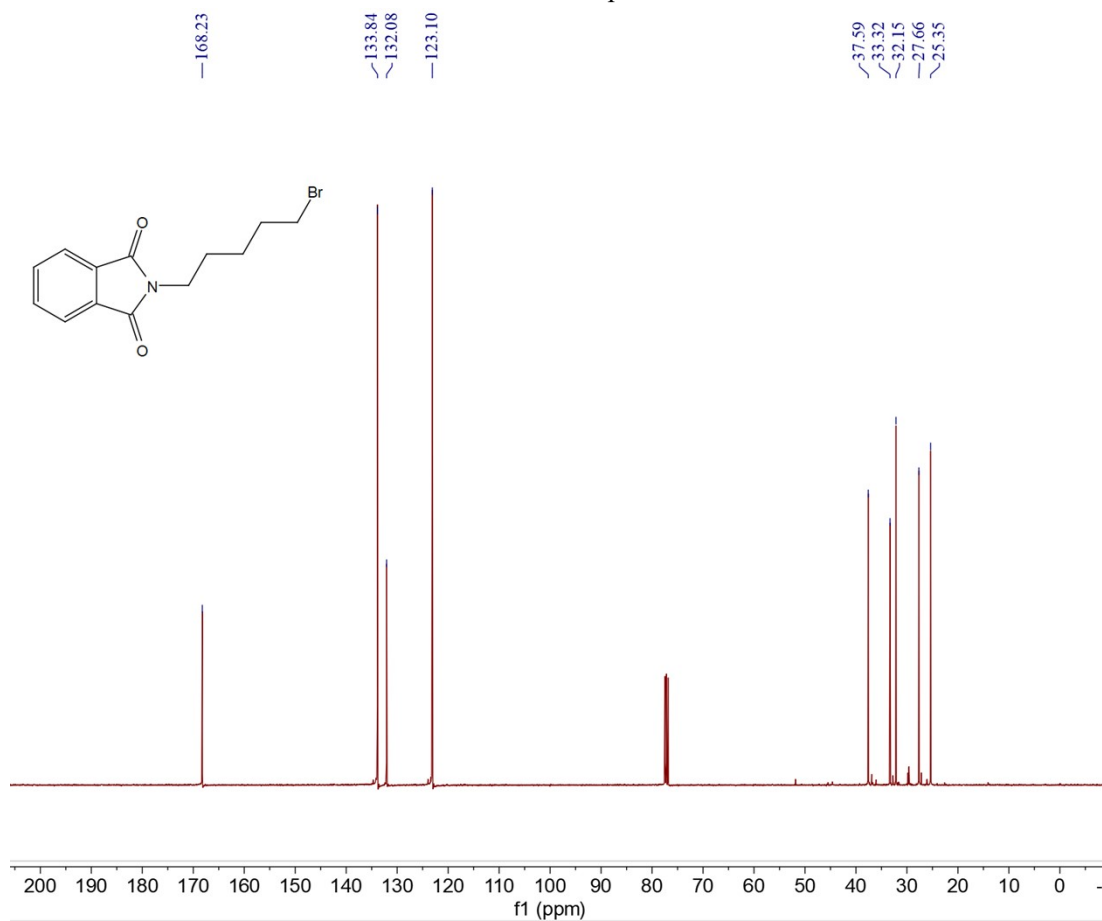

### $^1\text{H}$ NMR of compound 7

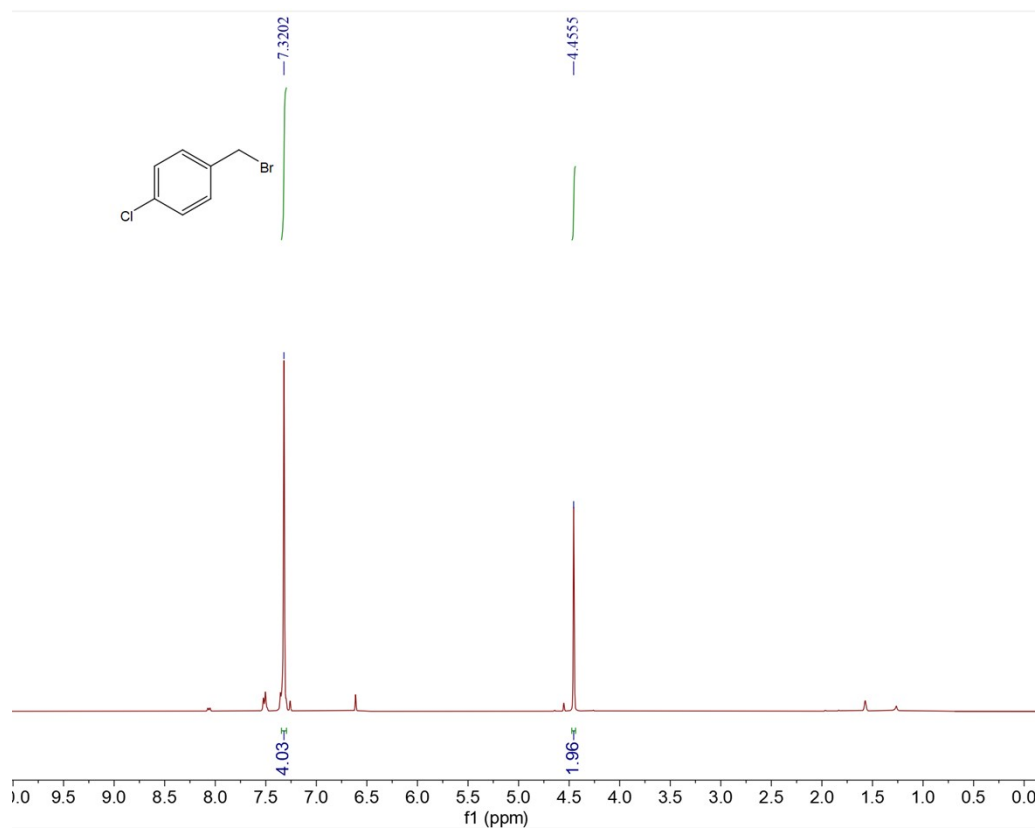

### $^{13}\text{C}$ NMR of compound 7

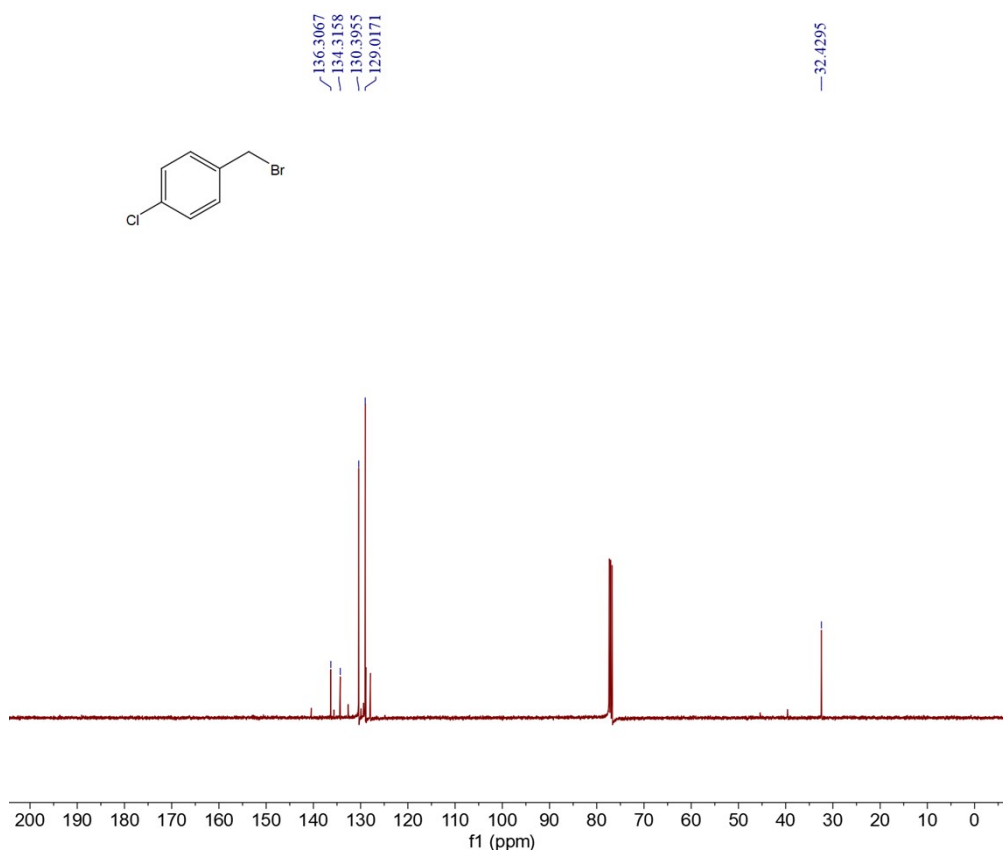

### $^1\text{H}$ NMR of compound **8**

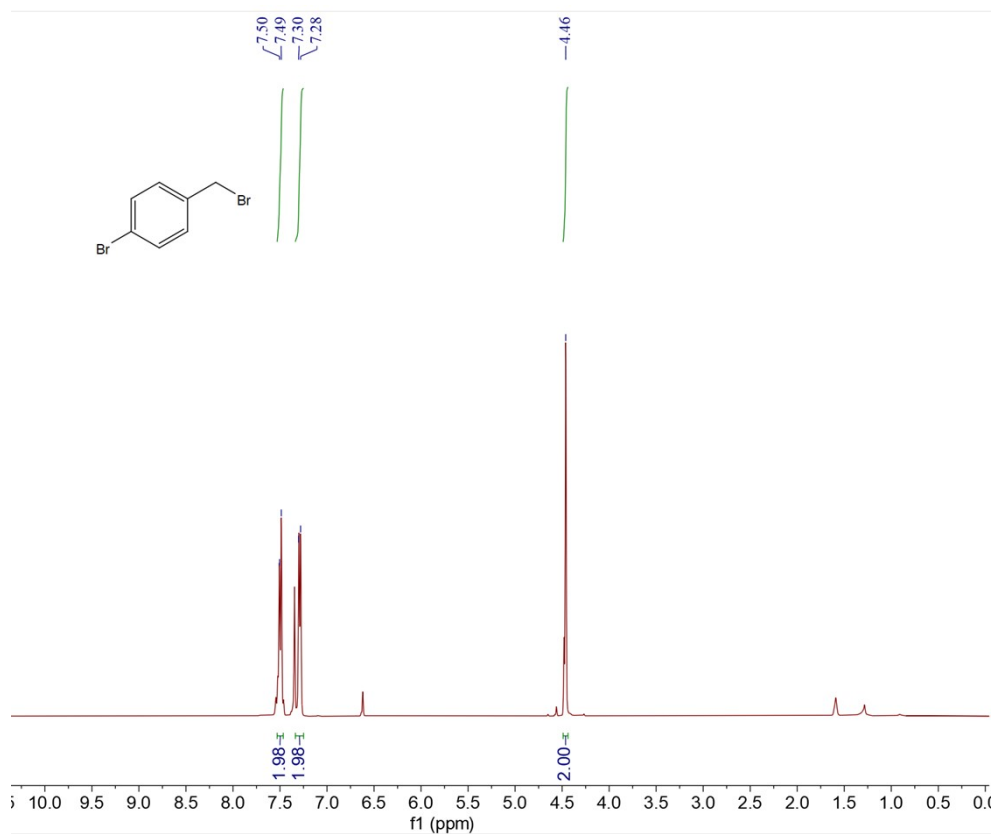

### $^{13}\text{C}$ NMR of compound **8**

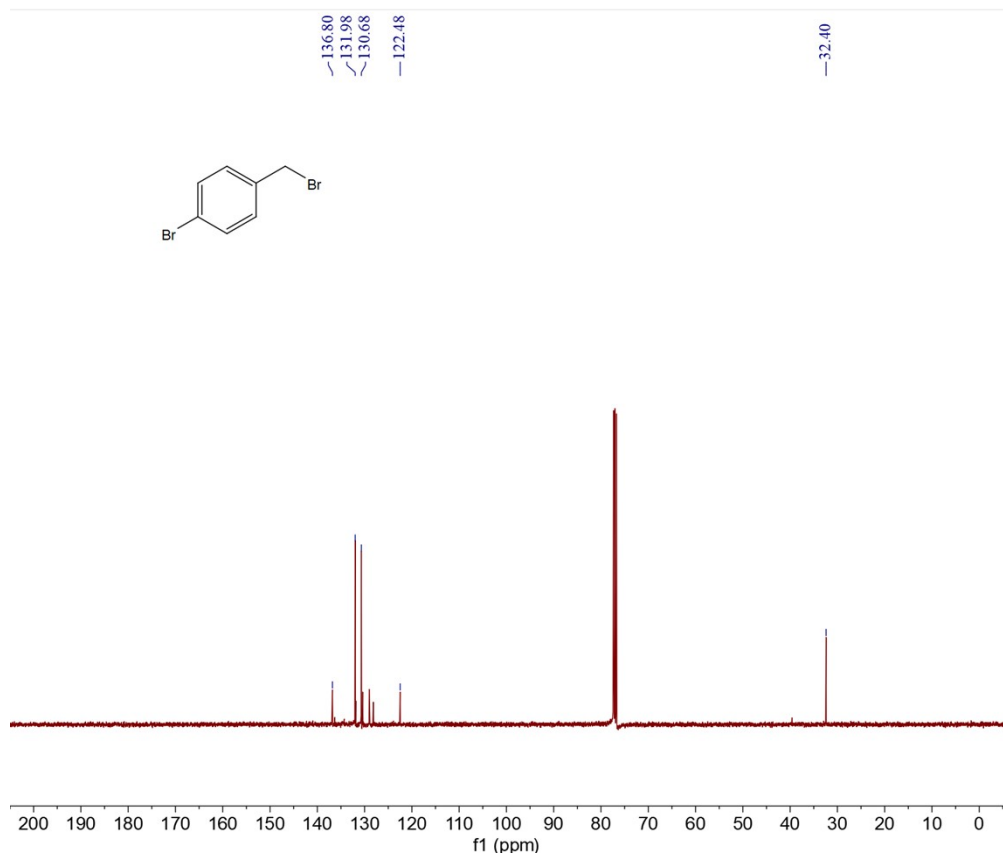



### <sup>1</sup>H NMR of compound 9

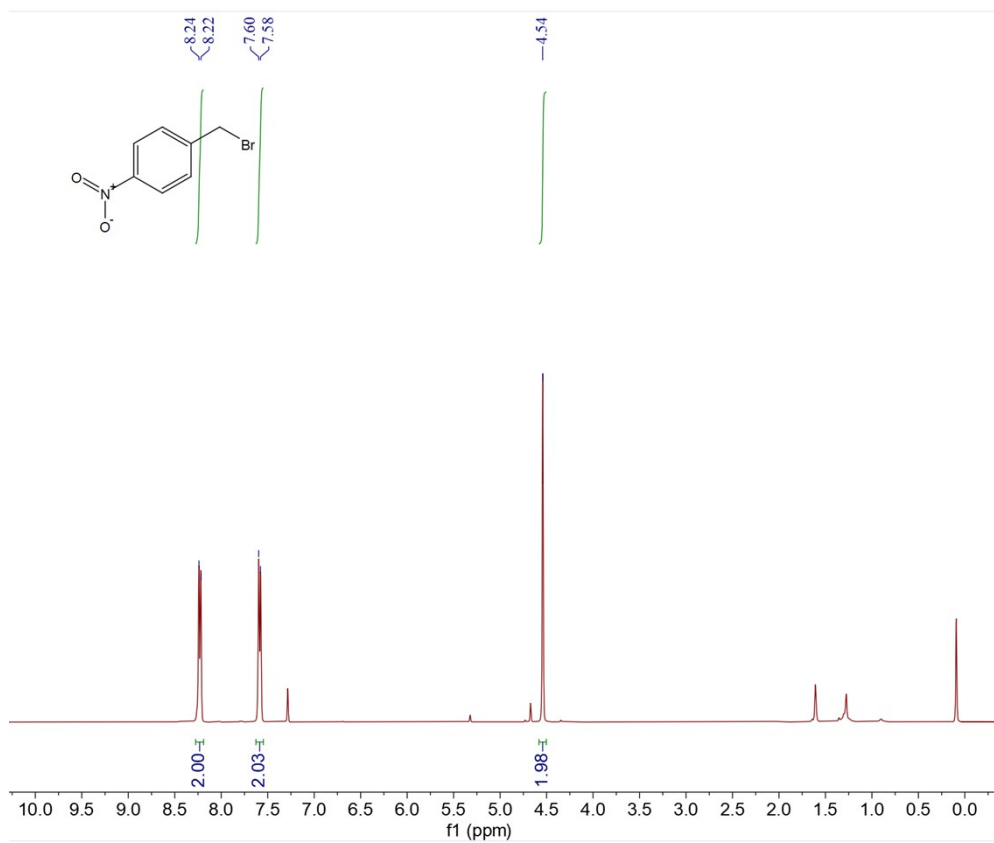

### <sup>13</sup>C NMR of compound 9

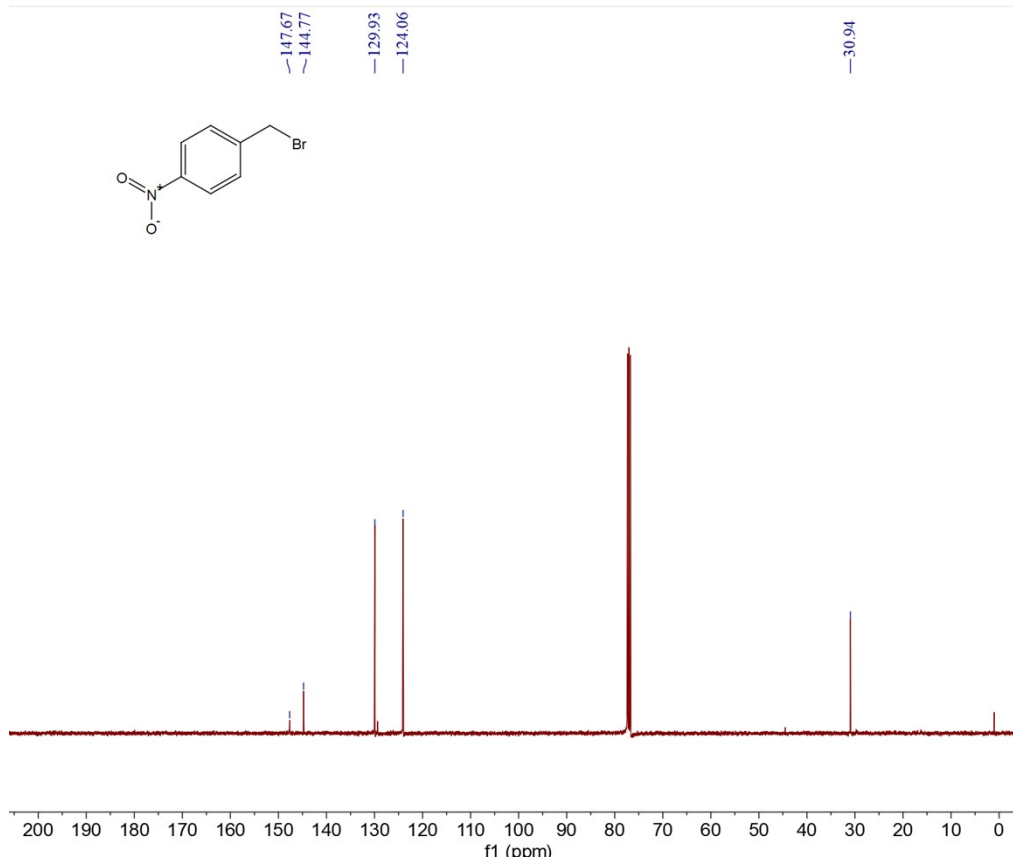

<sup>1</sup>H NMR of compound **10**

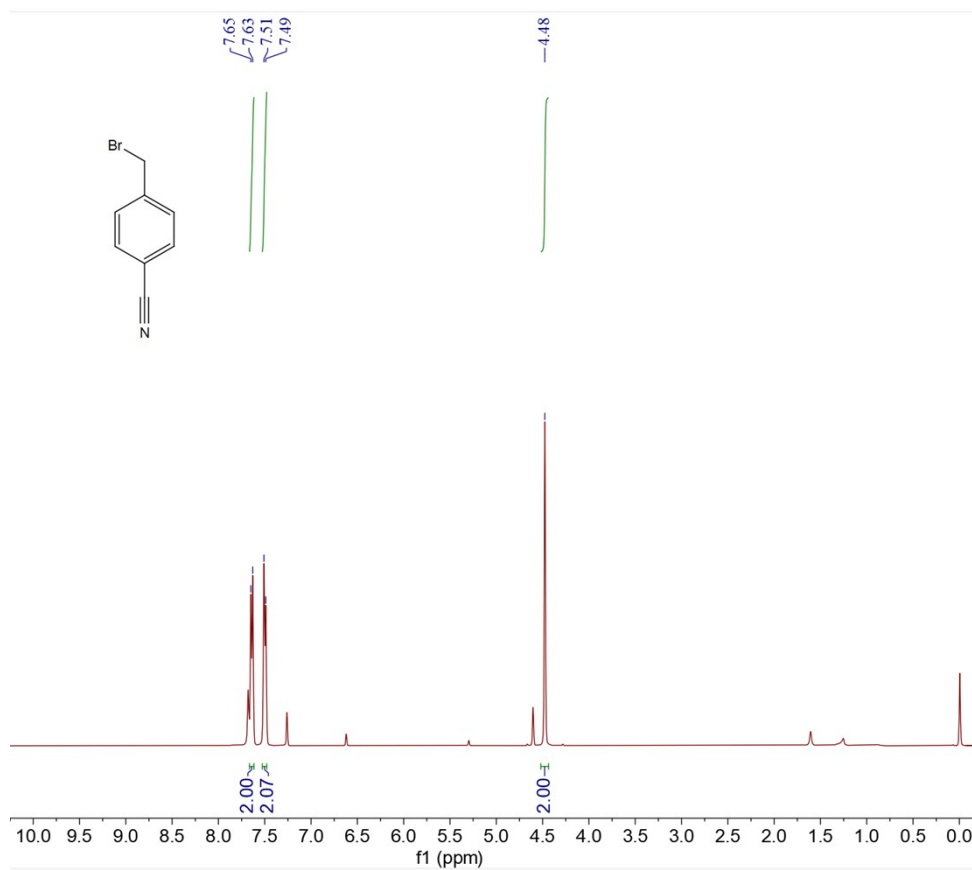

<sup>13</sup>C NMR of compound **10**

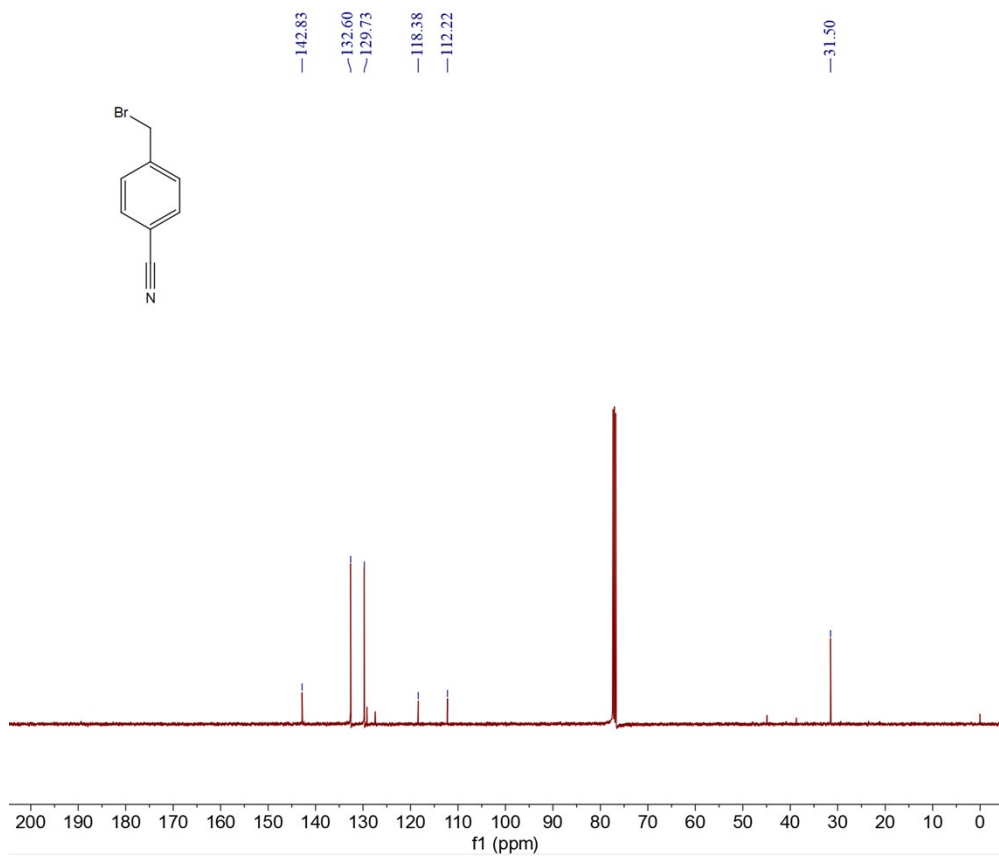

<sup>1</sup>H NMR of compound **11**

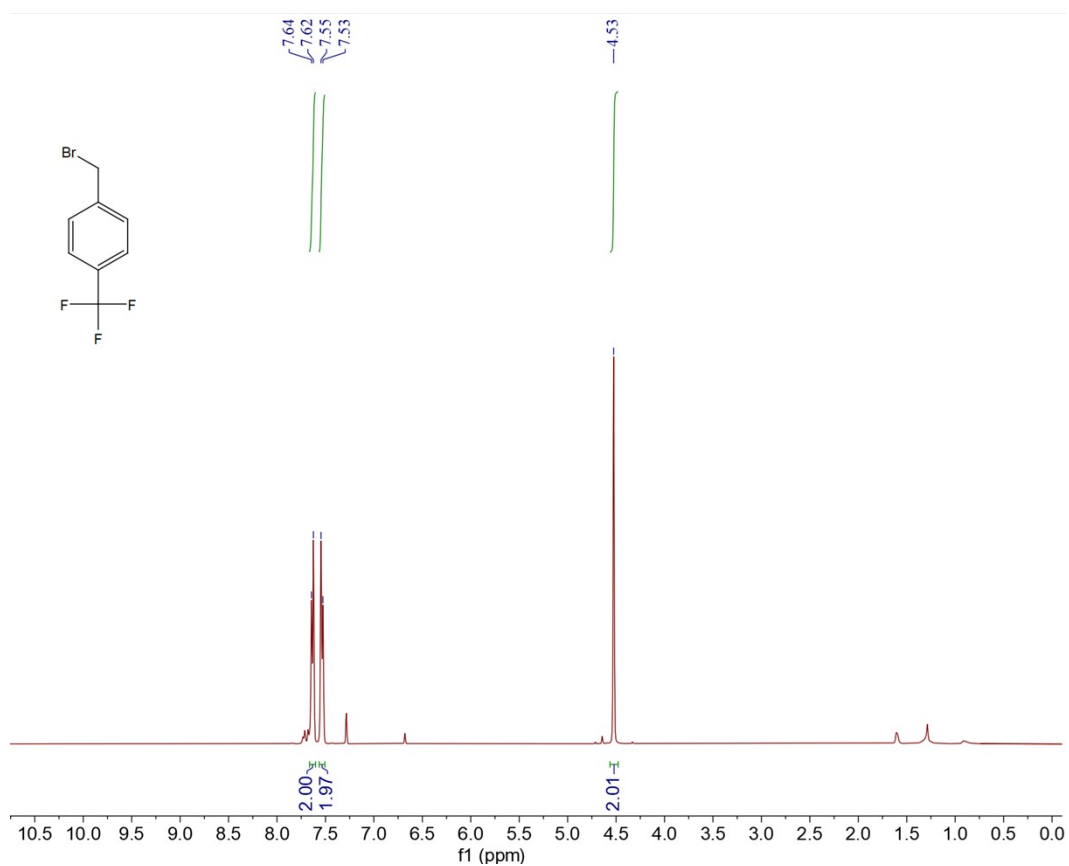

<sup>13</sup>C NMR of compound **11**

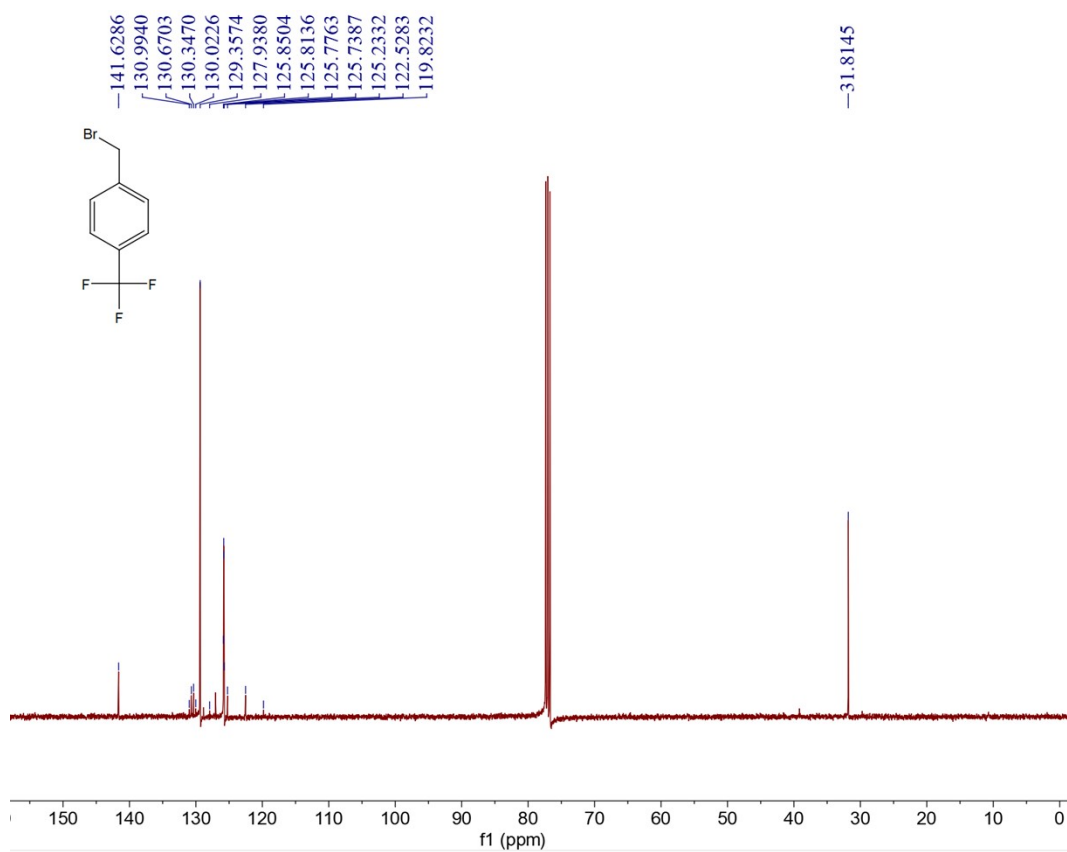

# $^{19}\text{F}$ NMR of compound **11**

20230417.1.fid

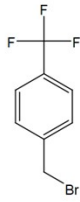

-62.75

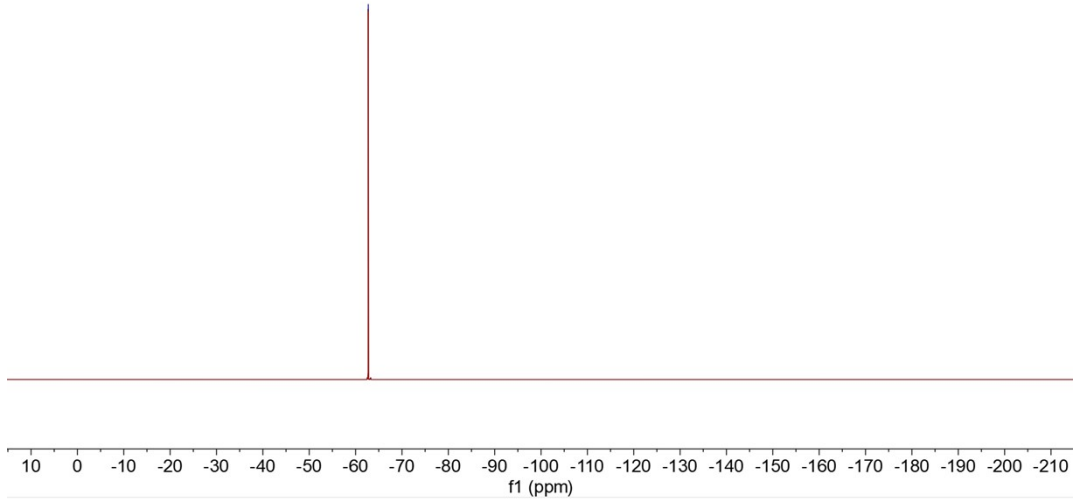

# $^1\text{H}$ NMR of compound **12**

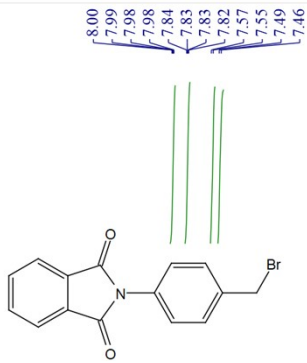

8.00  
7.99  
7.98  
7.98  
7.84  
7.83  
7.83  
7.82  
7.57  
7.55  
7.49  
7.46

4.56  
4.55

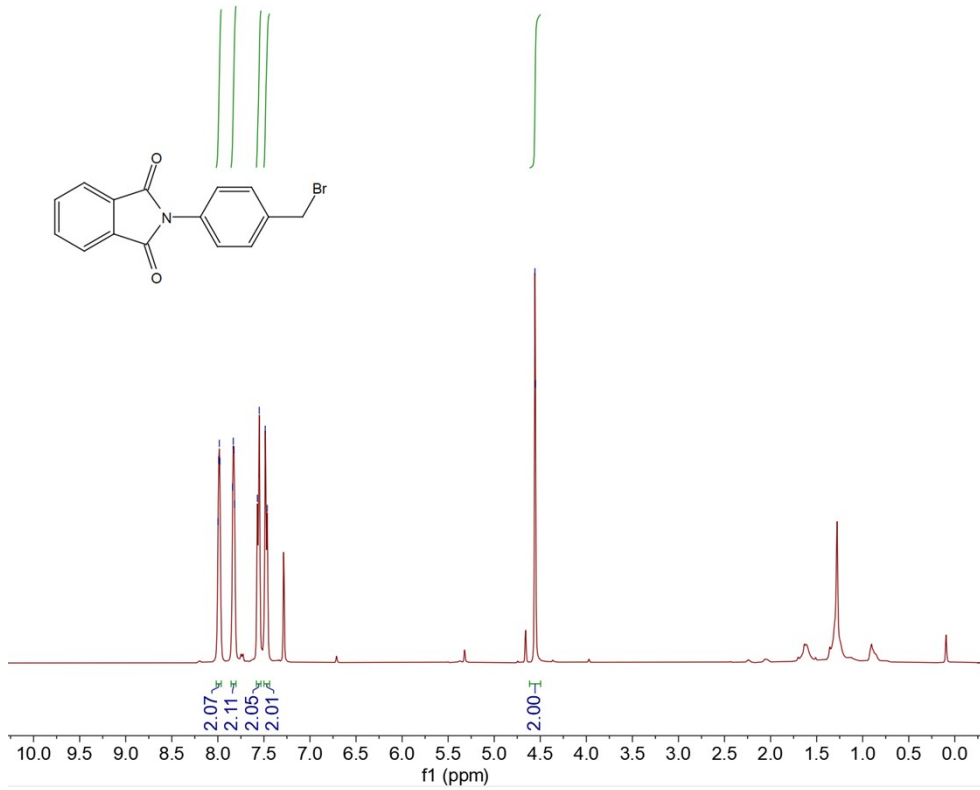

<sup>13</sup>C NMR of compound **12**

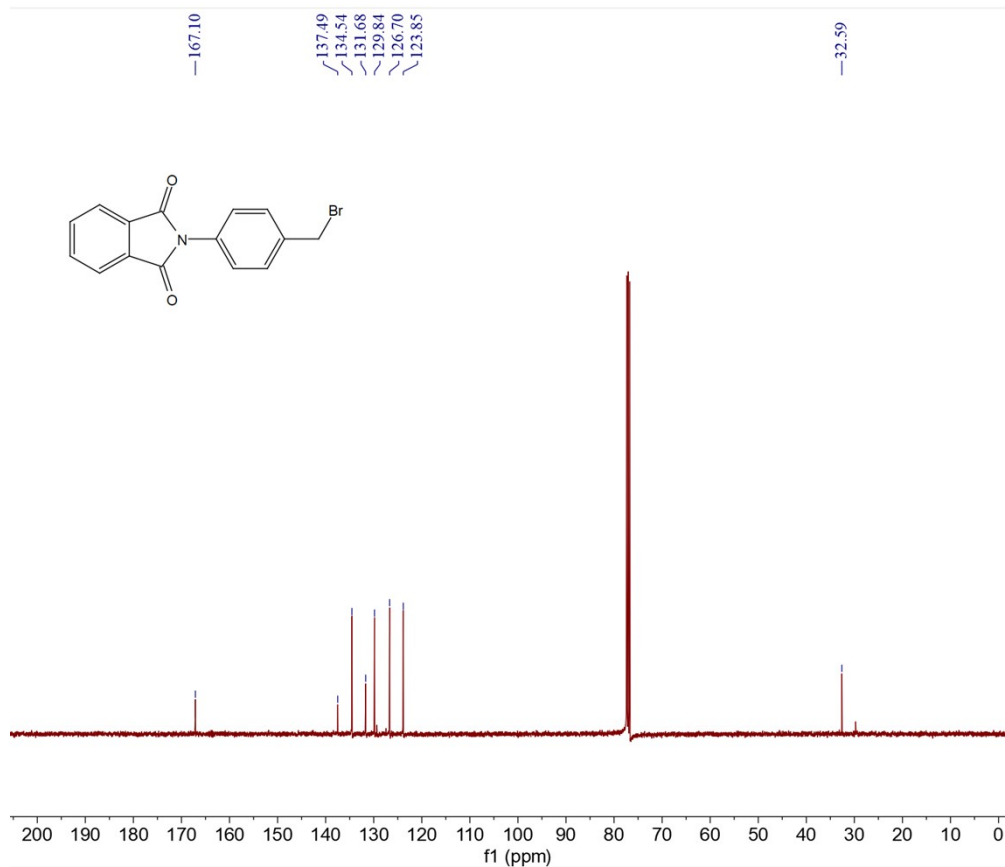

<sup>1</sup>H NMR of compound **13**

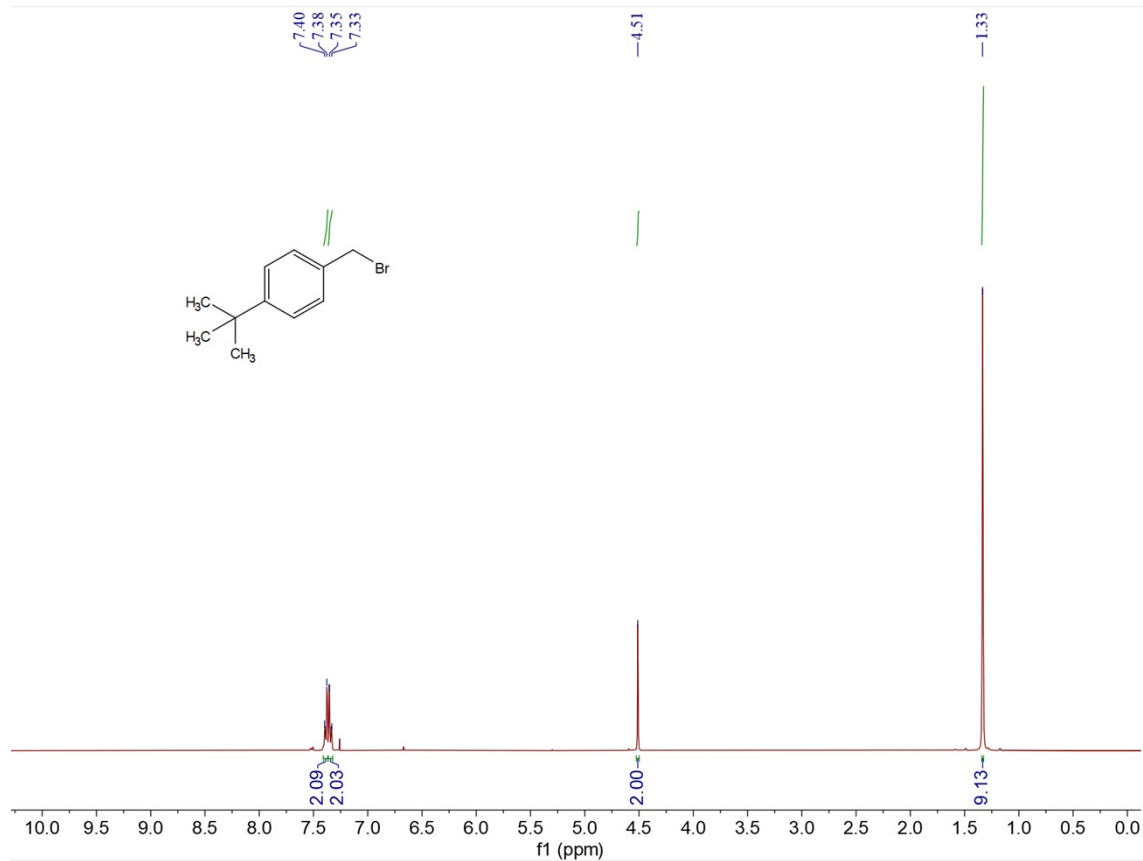

<sup>13</sup>C NMR of compound 13

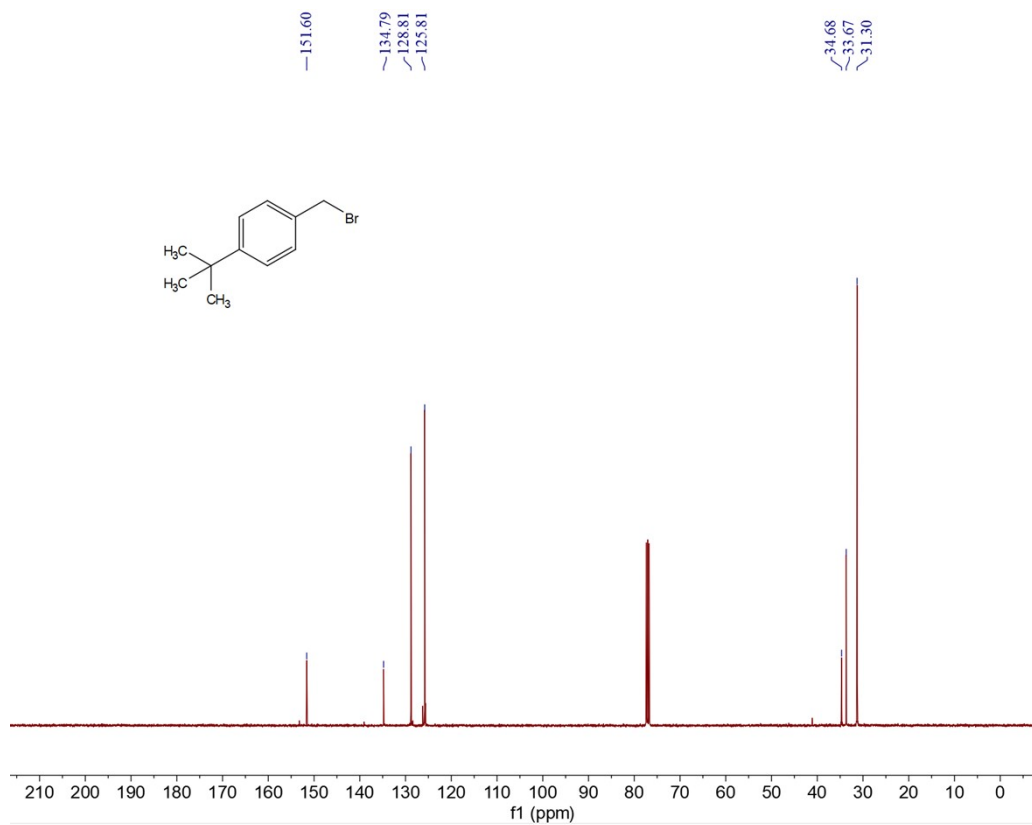

<sup>1</sup>H NMR of compound 14

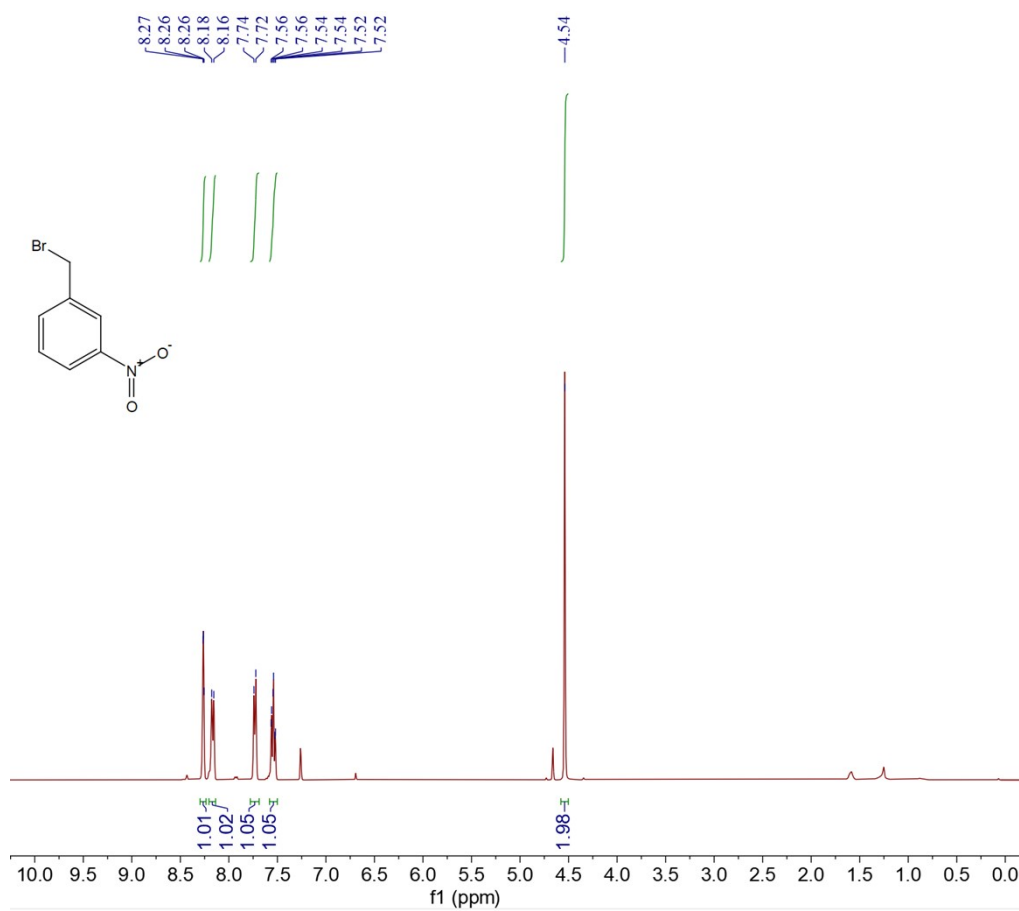

<sup>13</sup>C NMR of compound 14

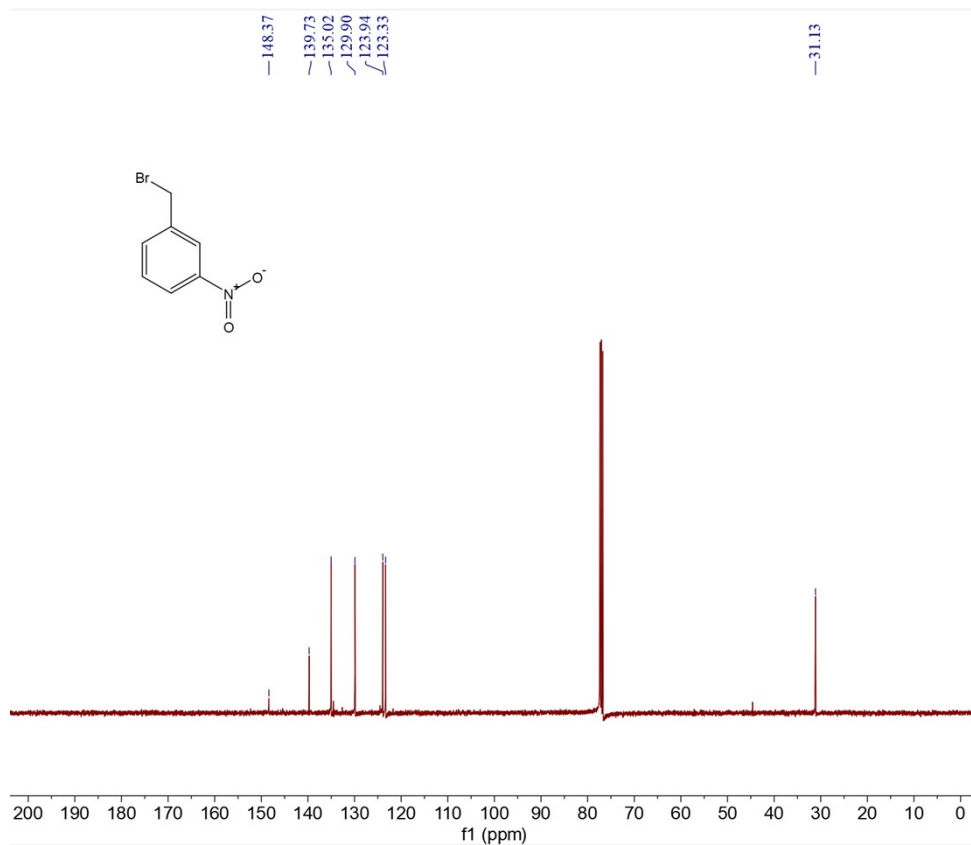

<sup>1</sup>H NMR of compound 15

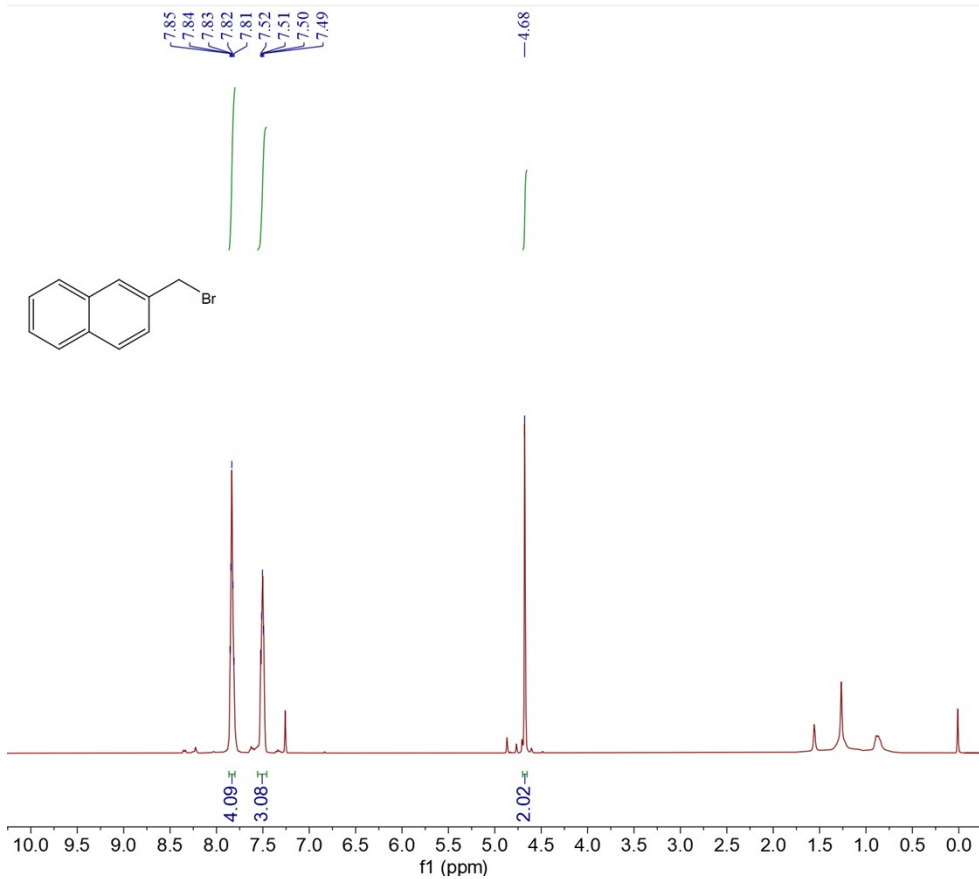

<sup>13</sup>C NMR of compound 15

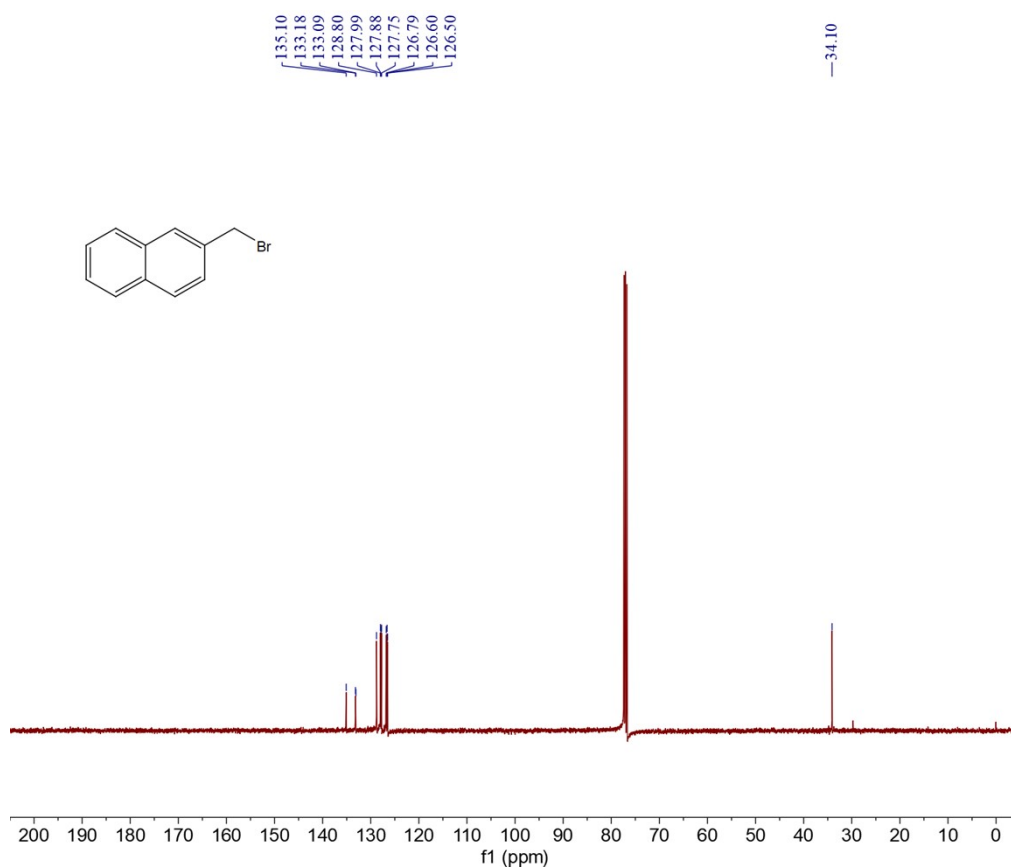

<sup>1</sup>H NMR of compound 16

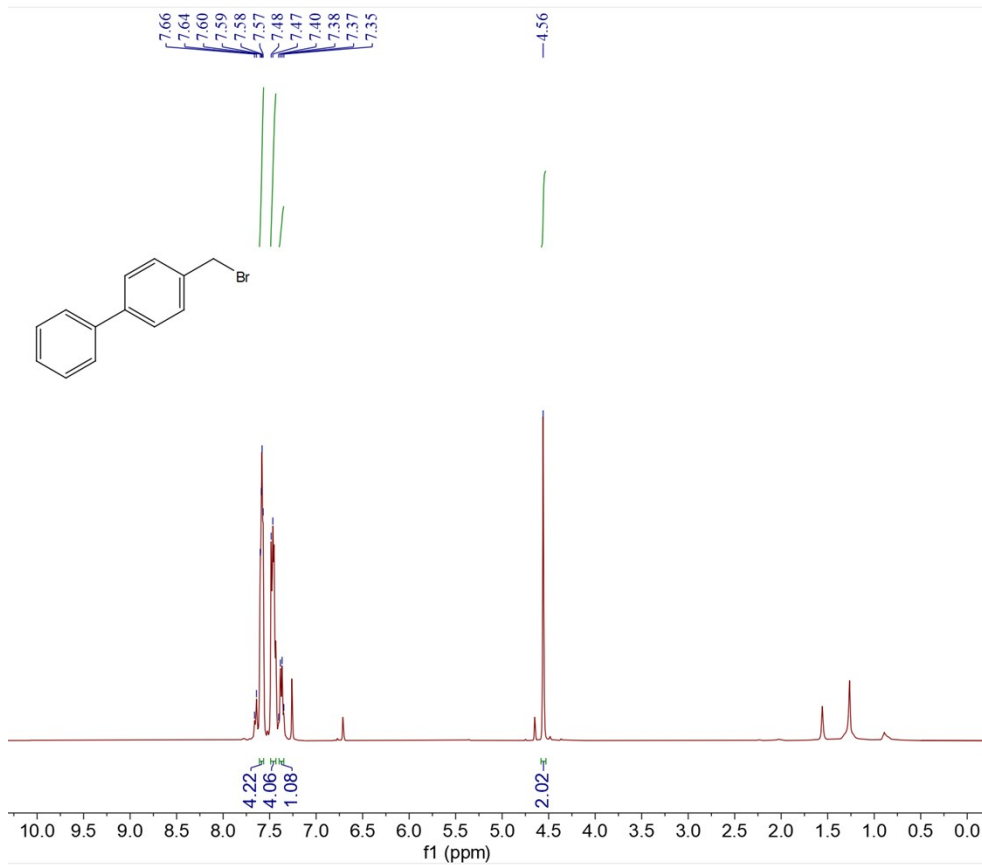



<sup>13</sup>C NMR of compound 16

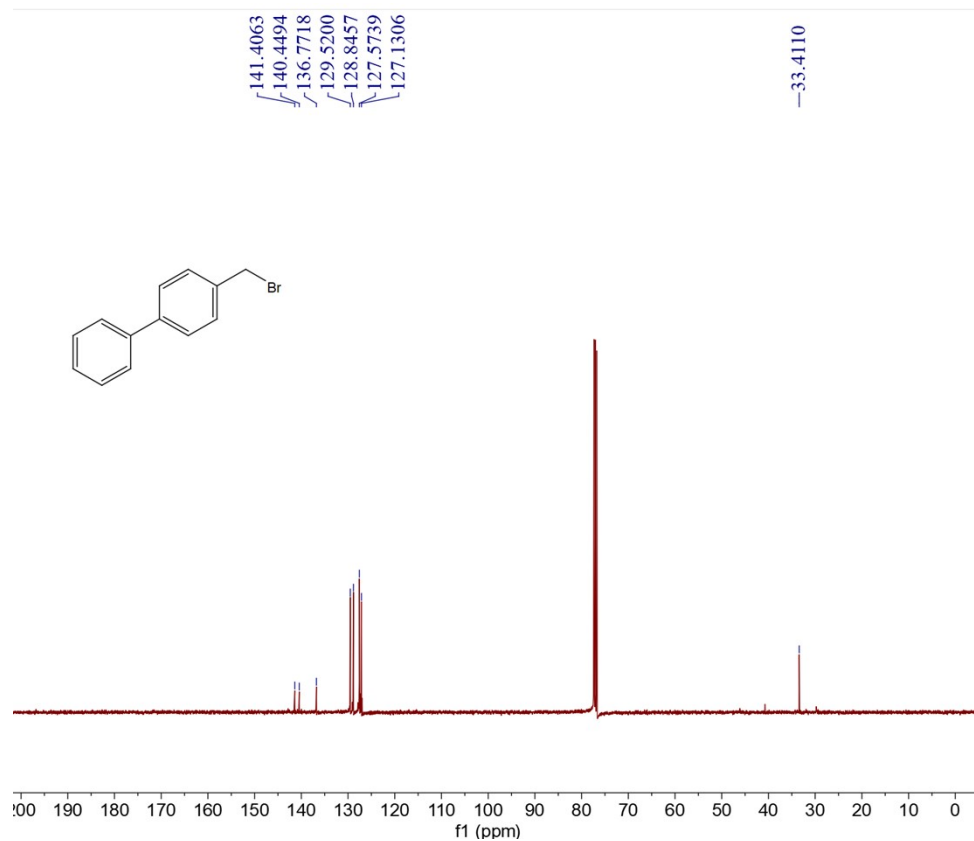

<sup>1</sup>H NMR of compound 17

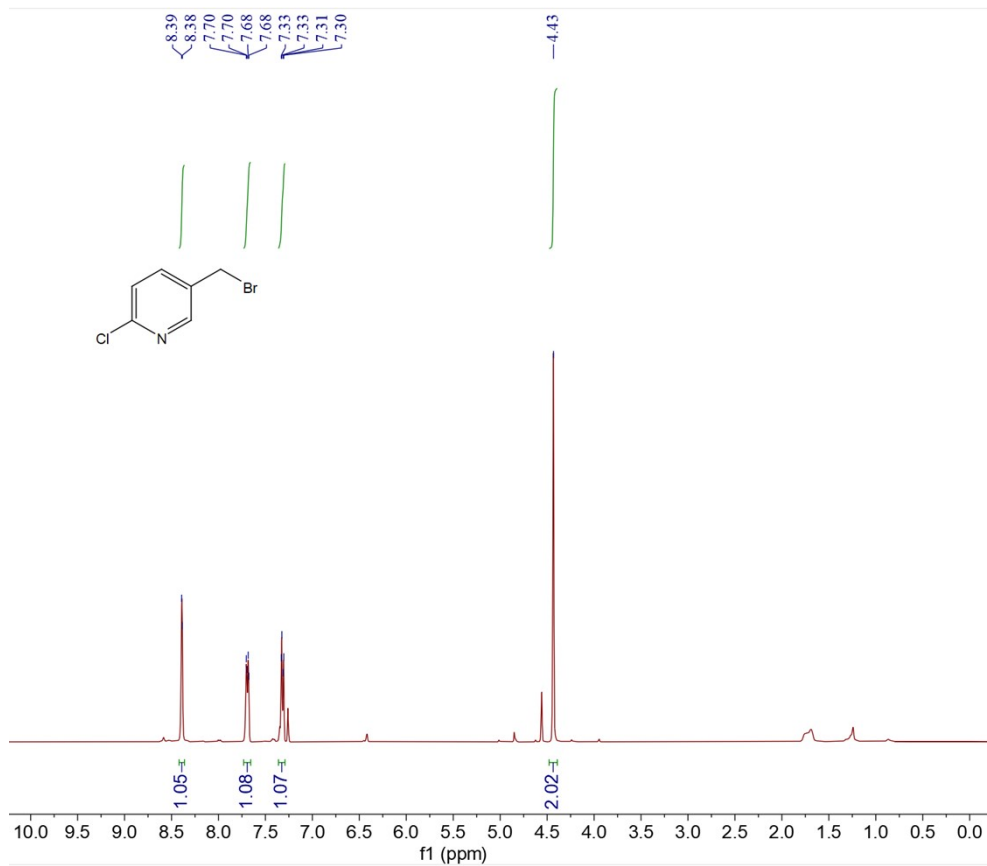

<sup>13</sup>C NMR of compound 17

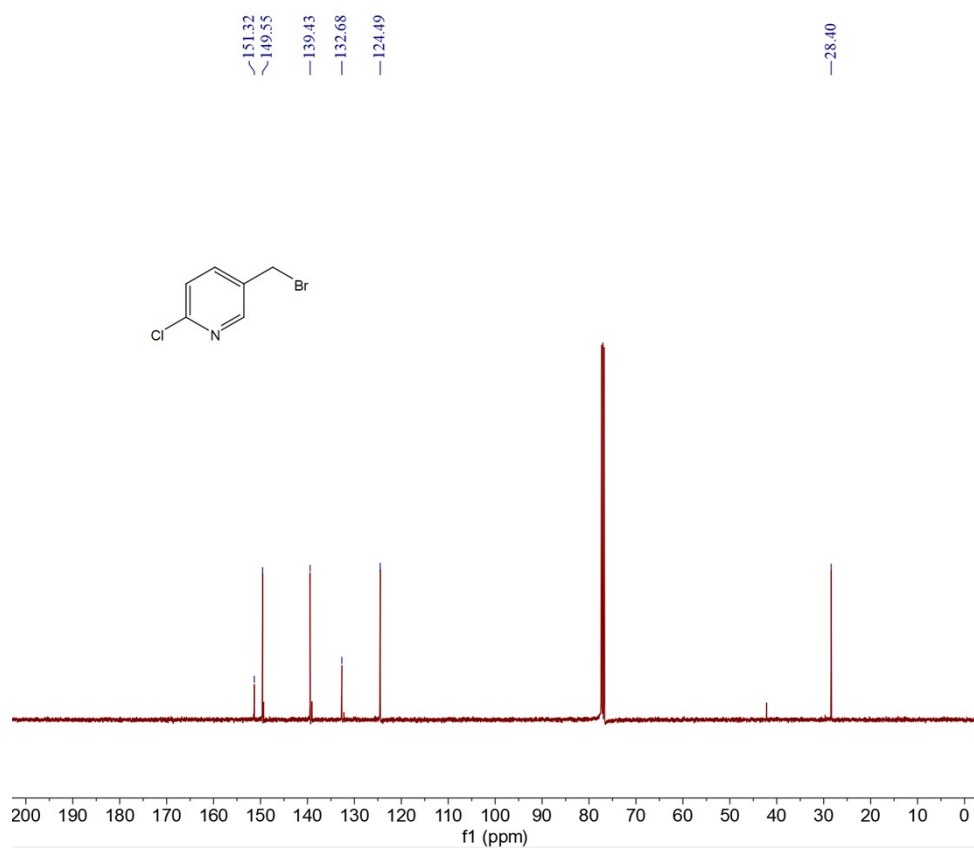

<sup>1</sup>H NMR of compound 18

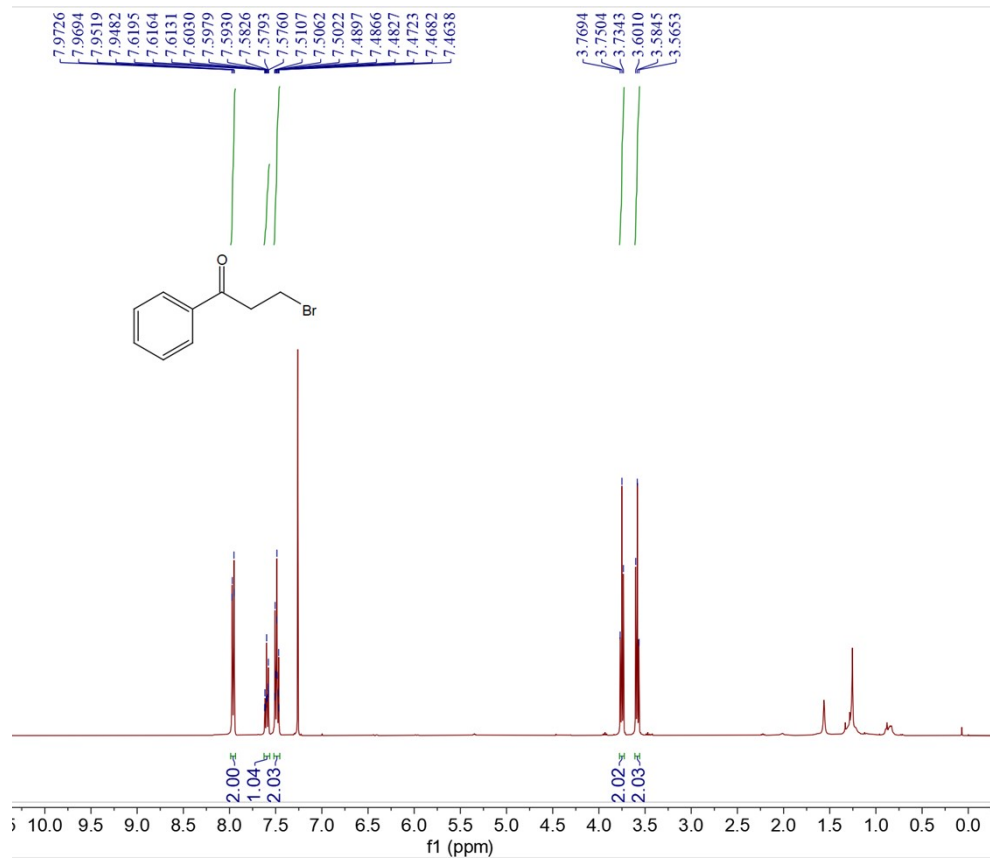

<sup>13</sup>C NMR of compound **18**

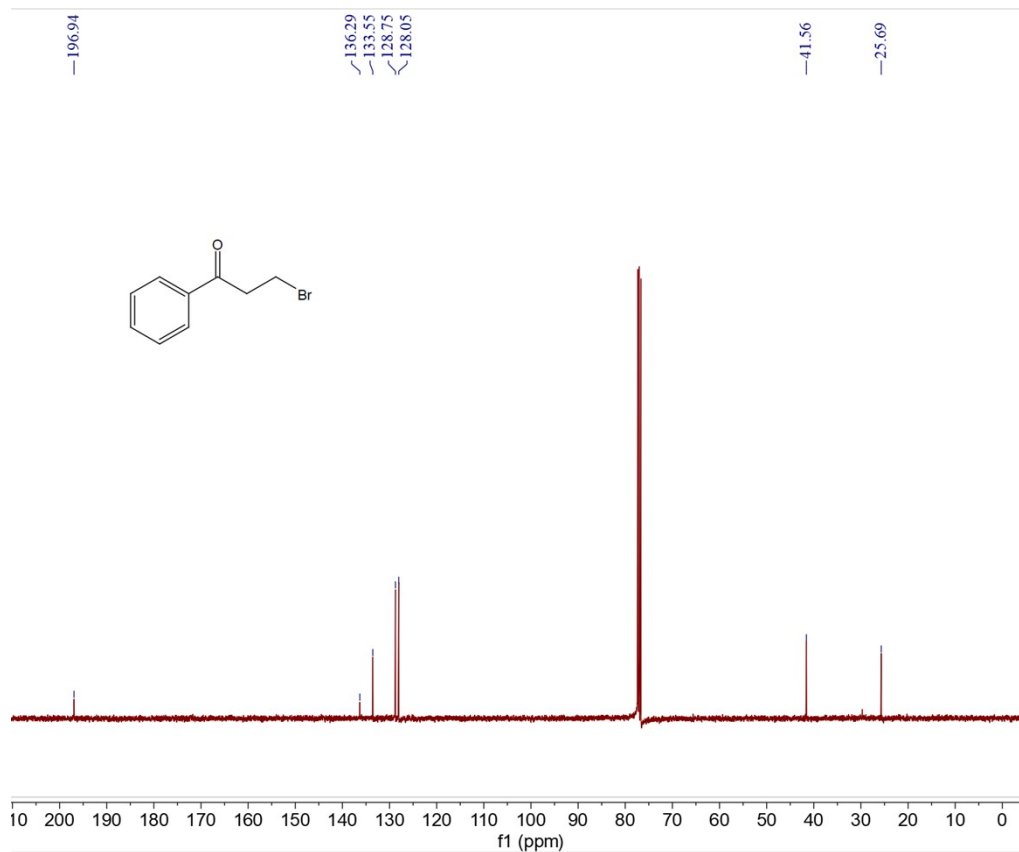

<sup>1</sup>H NMR of compound **19**

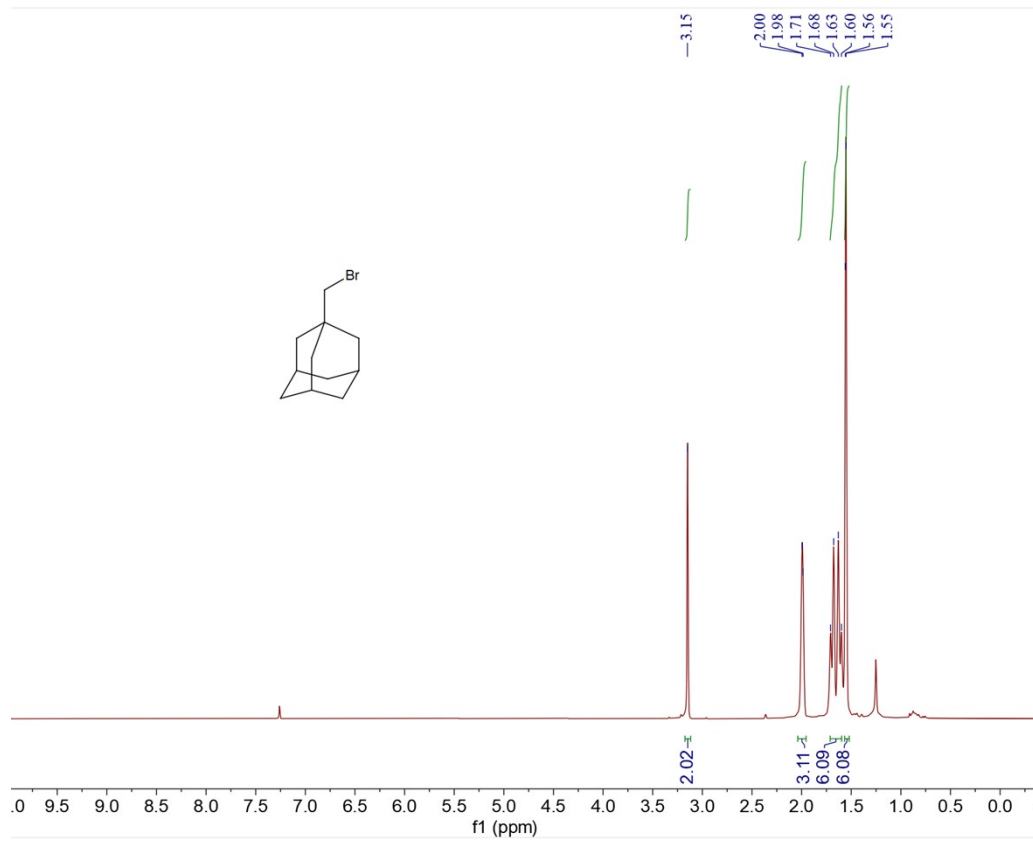

<sup>13</sup>C NMR of compound 19

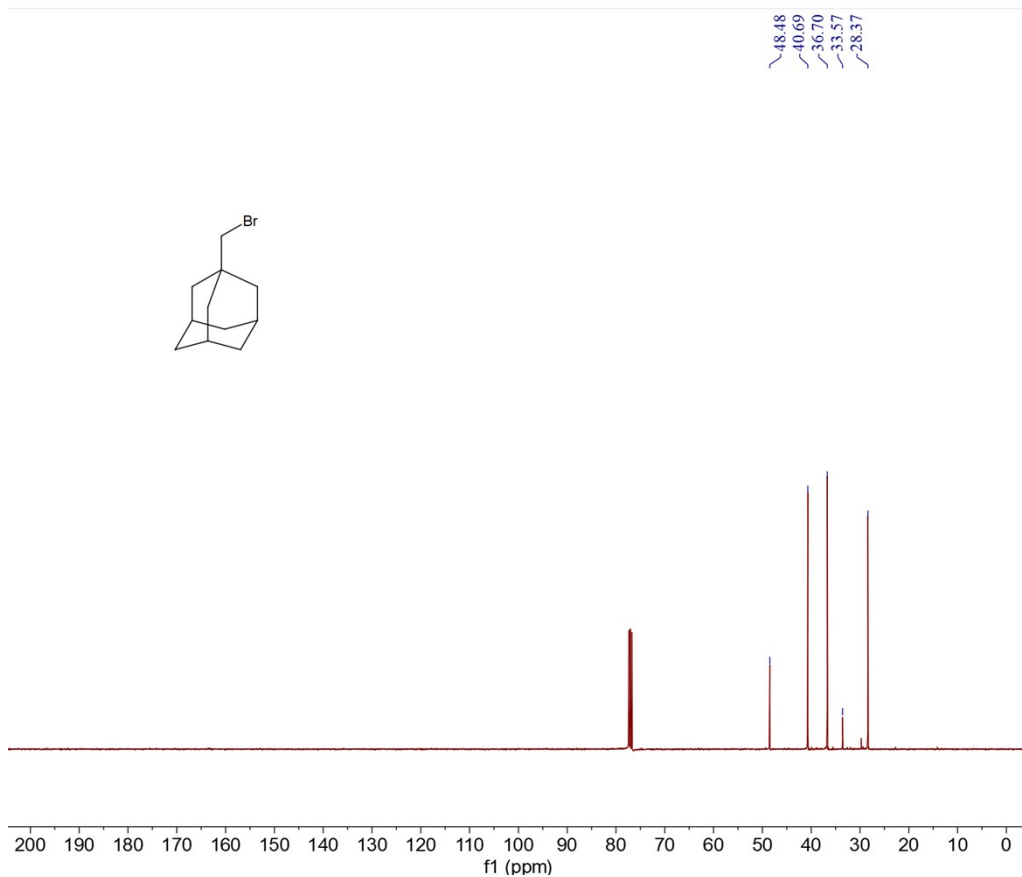

<sup>1</sup>H NMR of compound 20

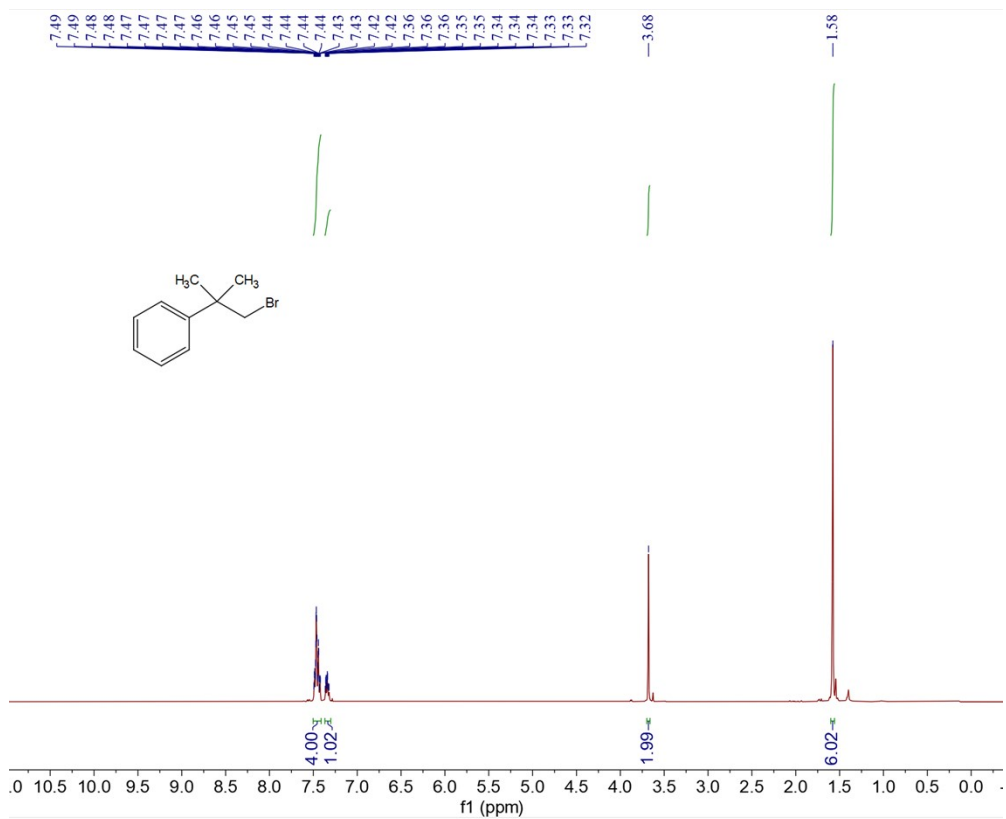

<sup>13</sup>C NMR of compound 20

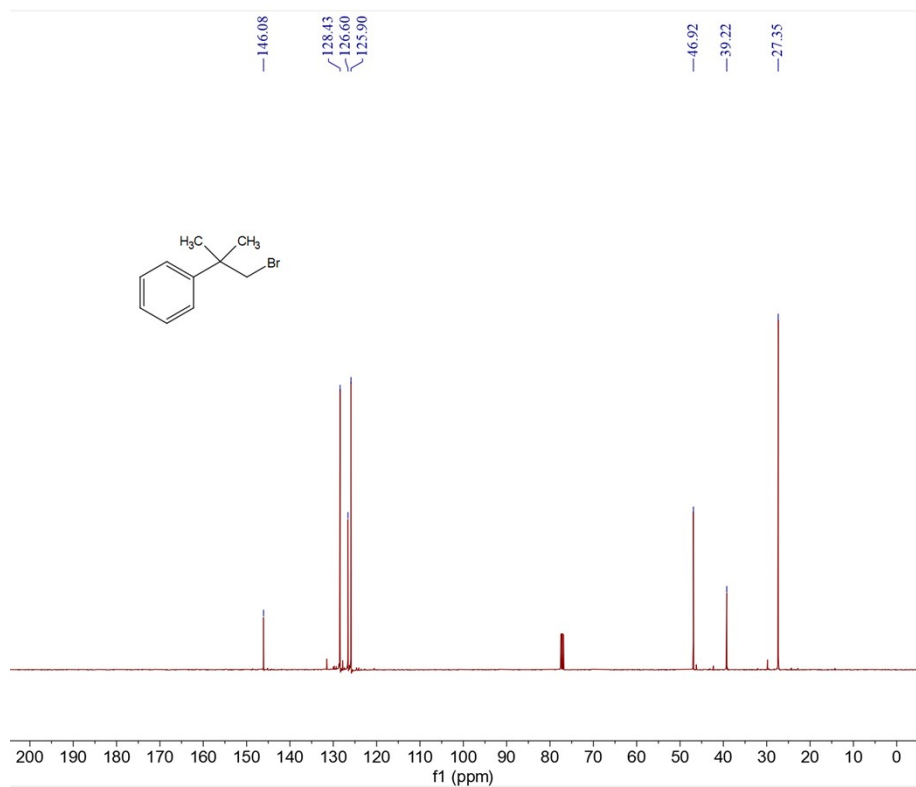

<sup>1</sup>H NMR of compound 21

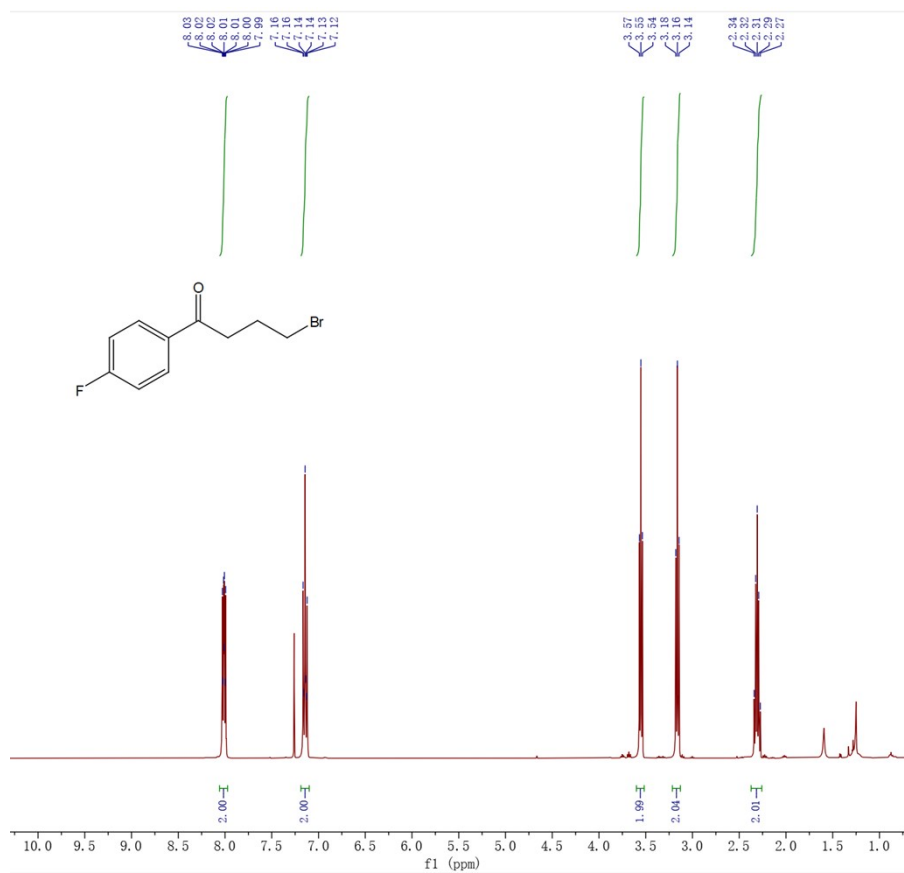

### <sup>13</sup>C NMR of compound 21

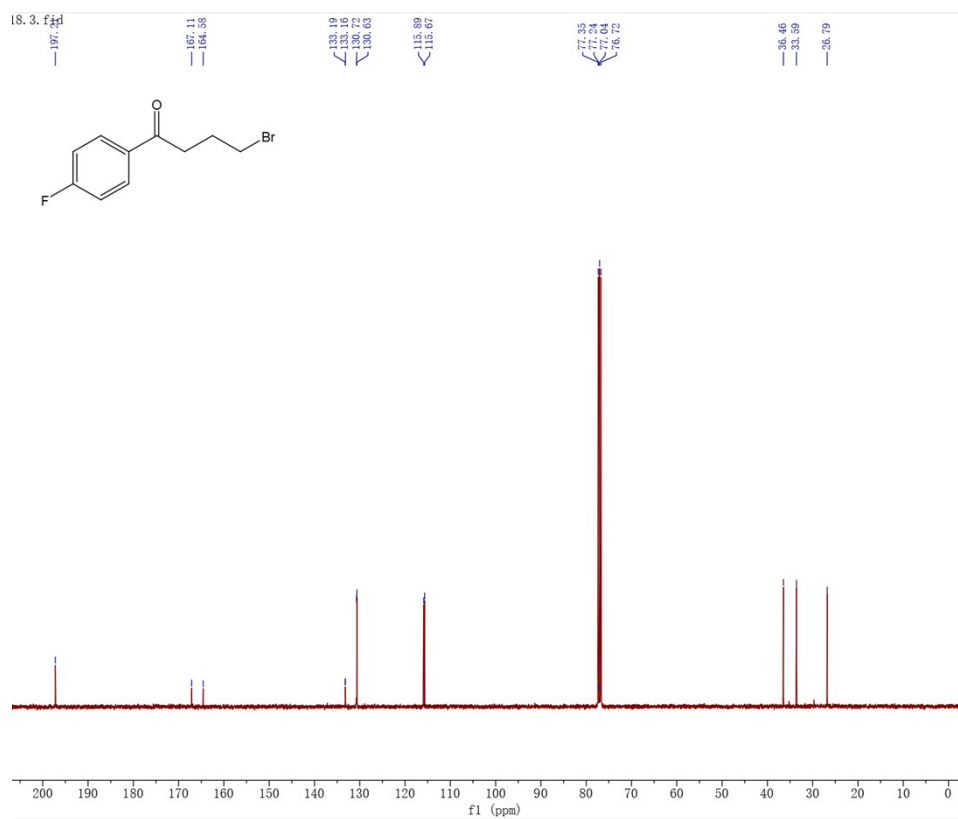

### <sup>19</sup>F NMR of compound 21

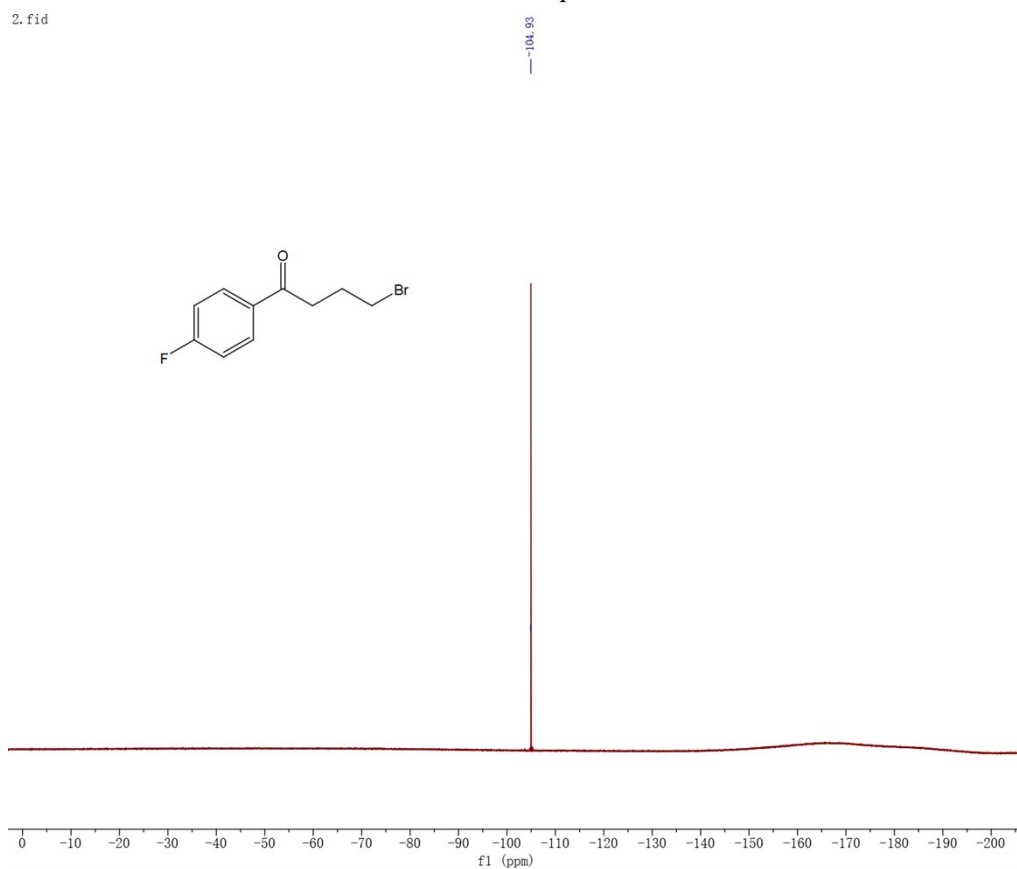

<sup>1</sup>H NMR of compound 22

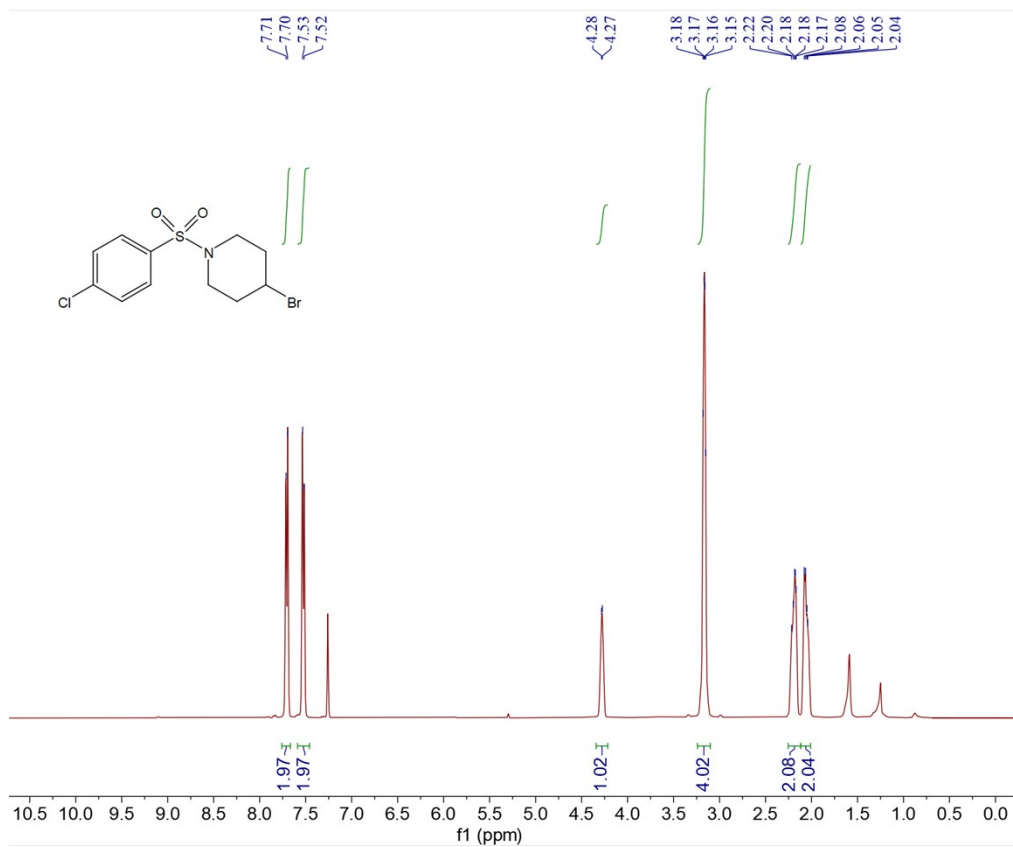

<sup>13</sup>C NMR of compound 22

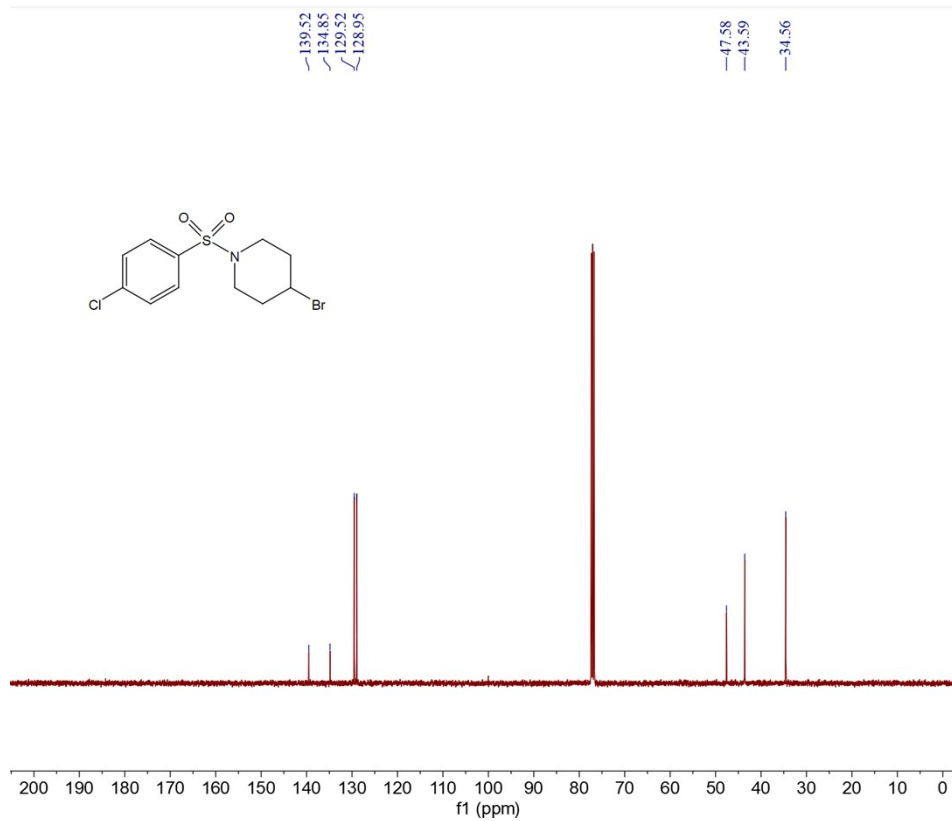

### <sup>1</sup>H NMR of compound **23**

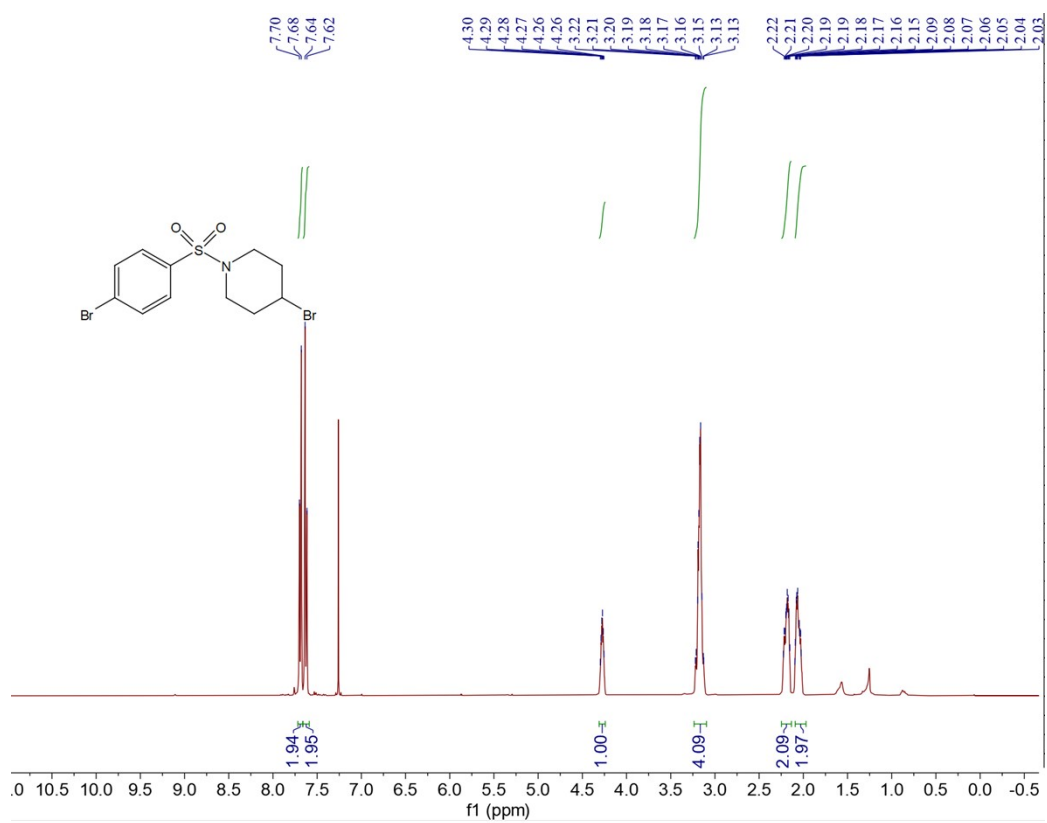

### <sup>13</sup>C NMR of compound **23**

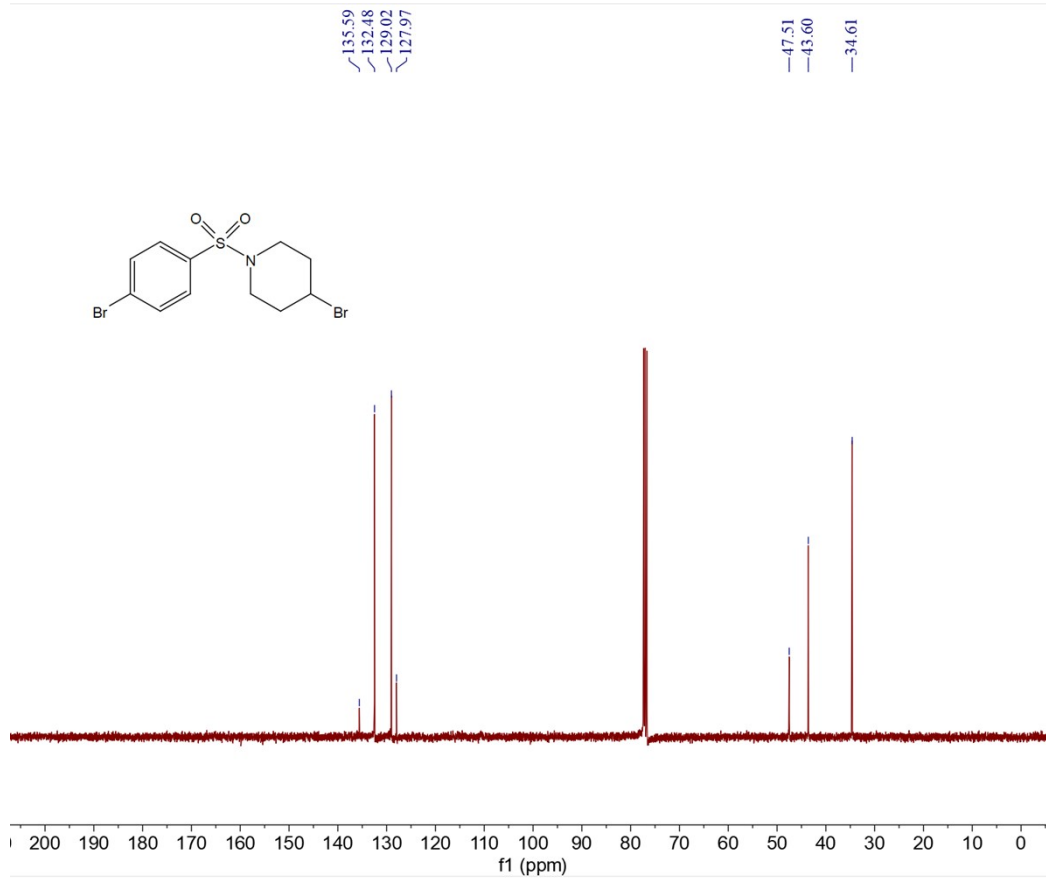



### <sup>1</sup>H NMR of compound 24

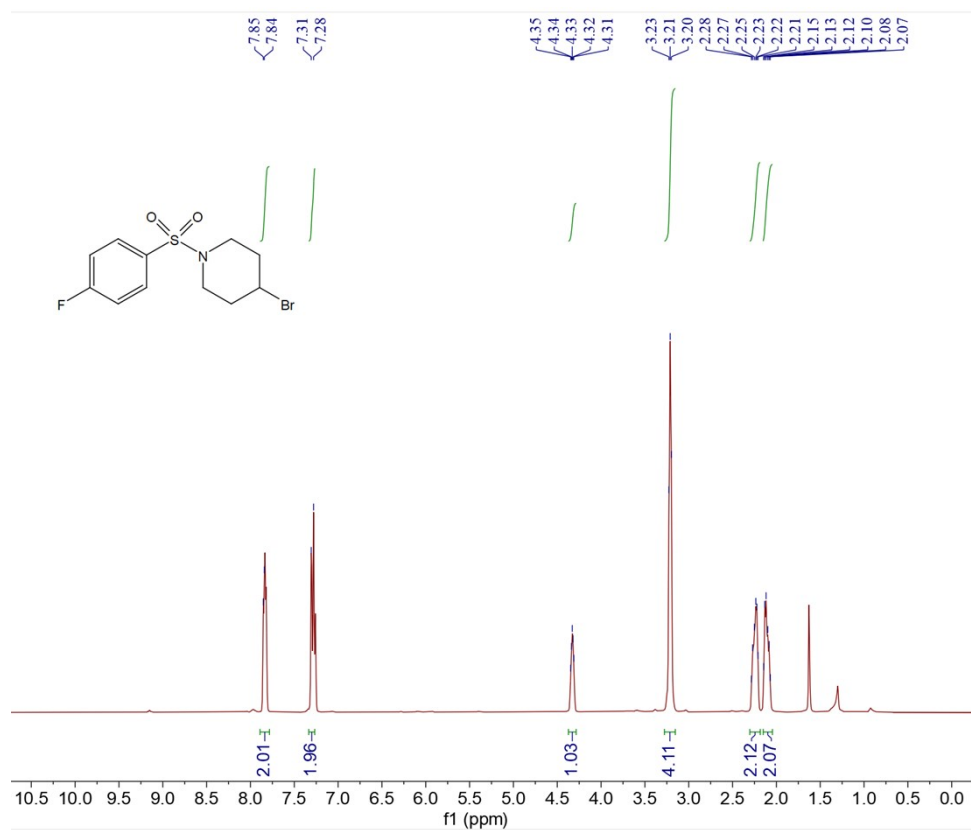

### <sup>13</sup>C NMR of compound 24

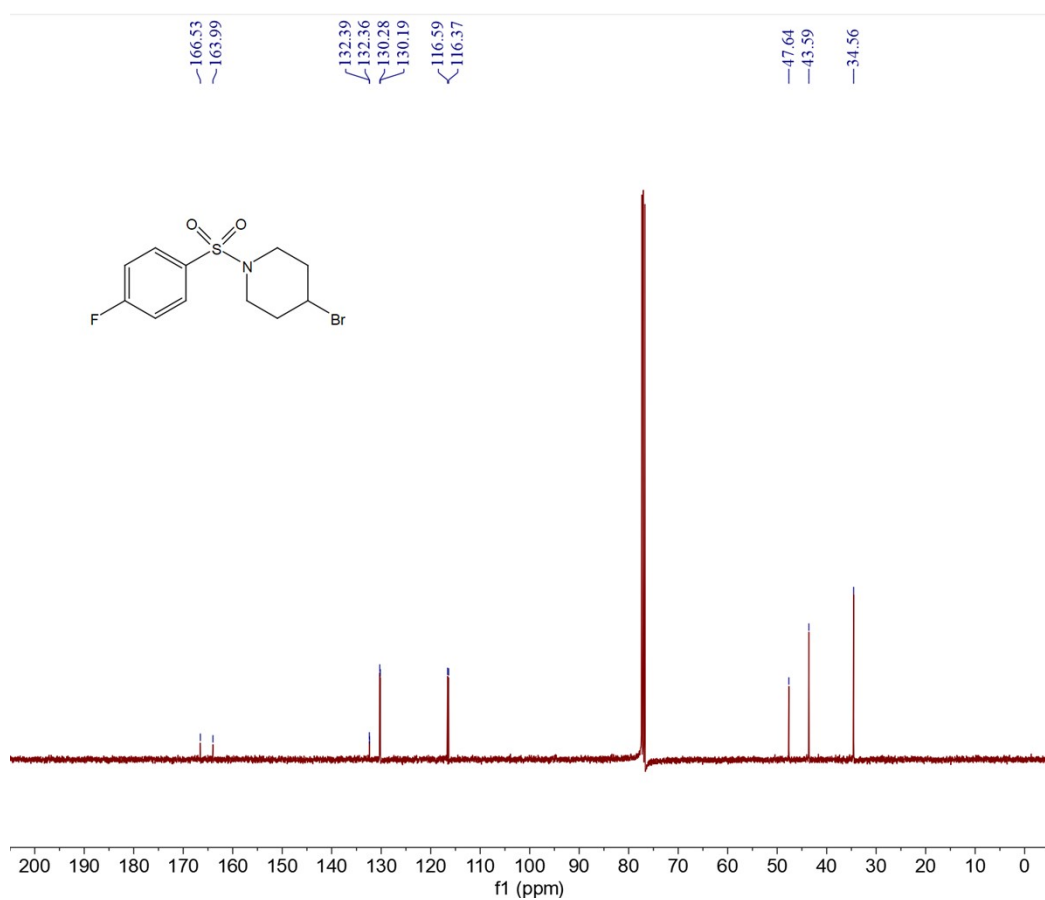

# <sup>19</sup>F NMR of compound 24

0230414-1.11.fid

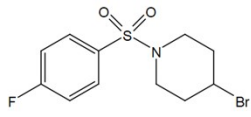

-104.82

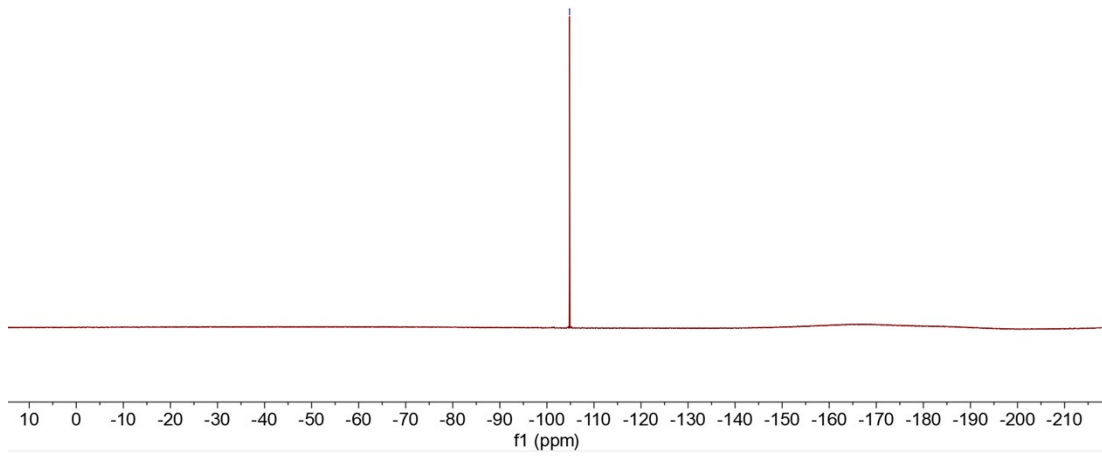

# <sup>1</sup>H NMR of compound 25

1.fid

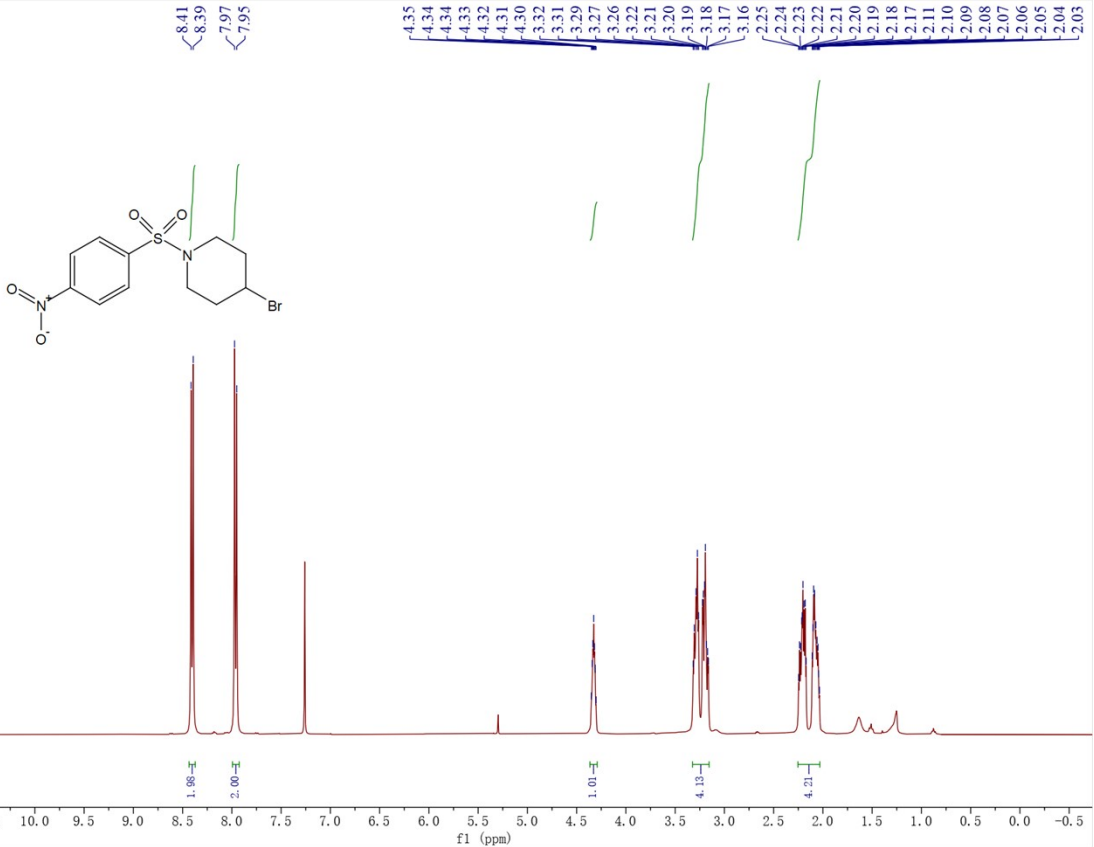

### <sup>13</sup>C NMR of compound 25

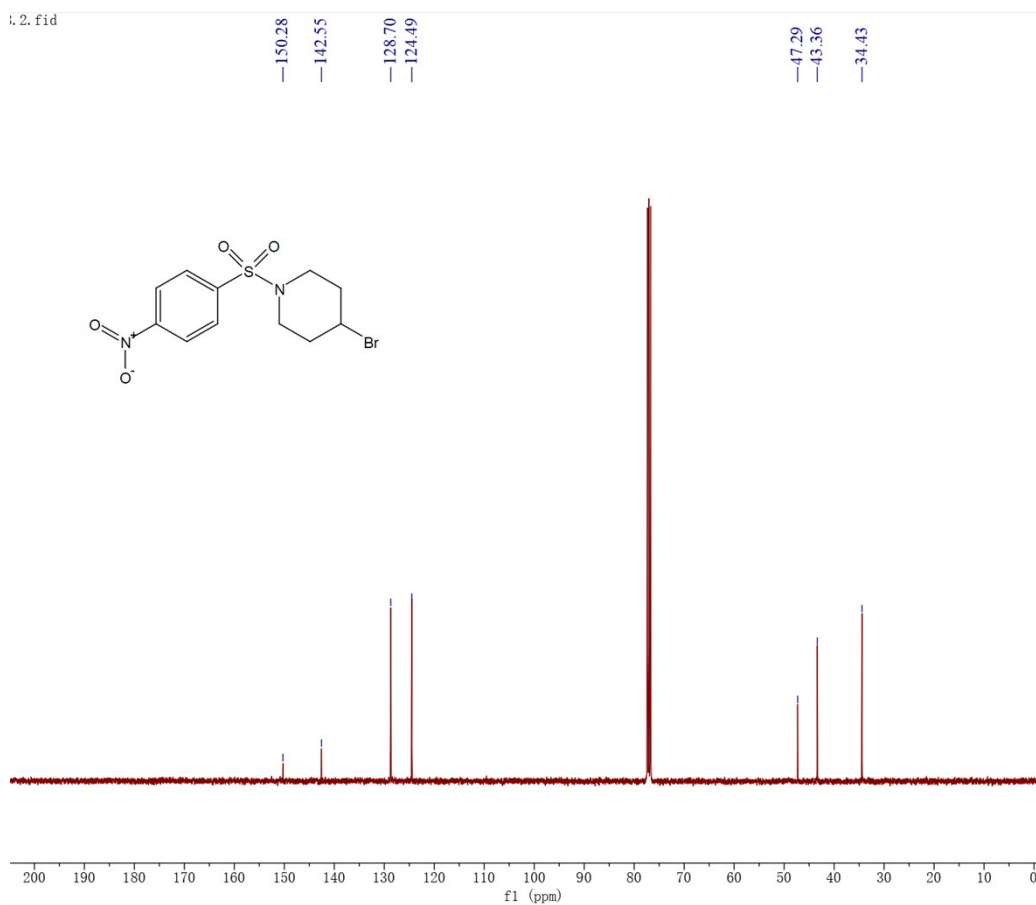

### <sup>1</sup>H NMR of compound 26

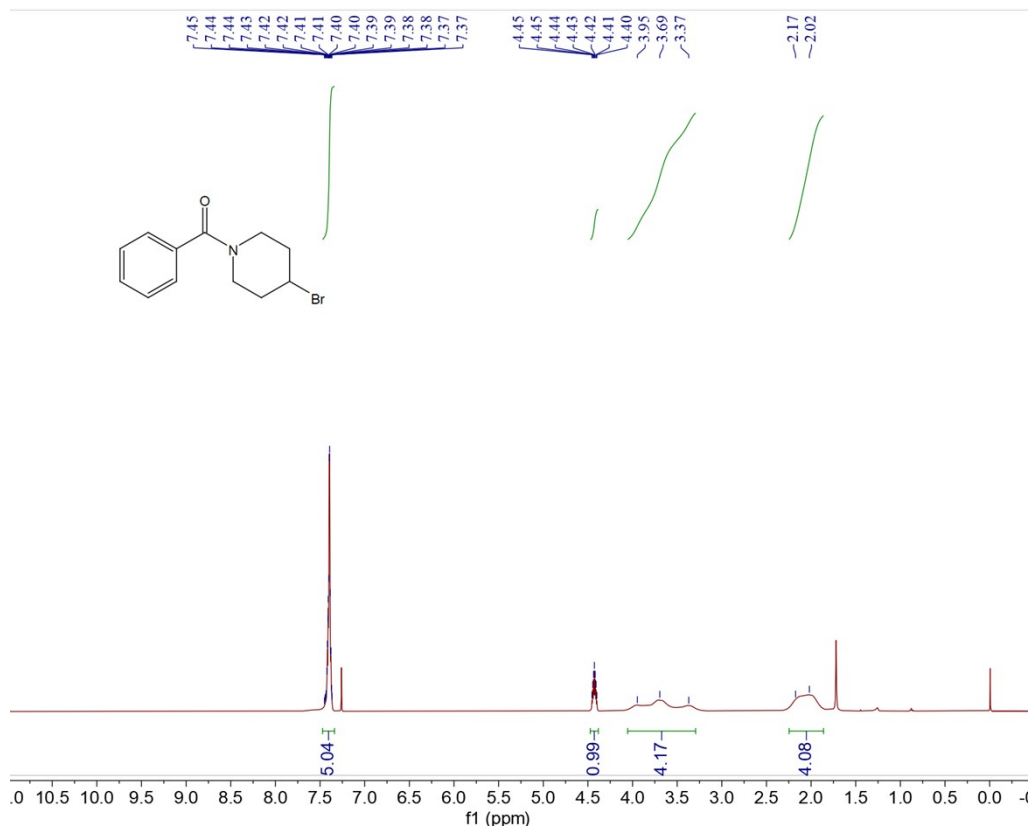

<sup>13</sup>C NMR of compound 26

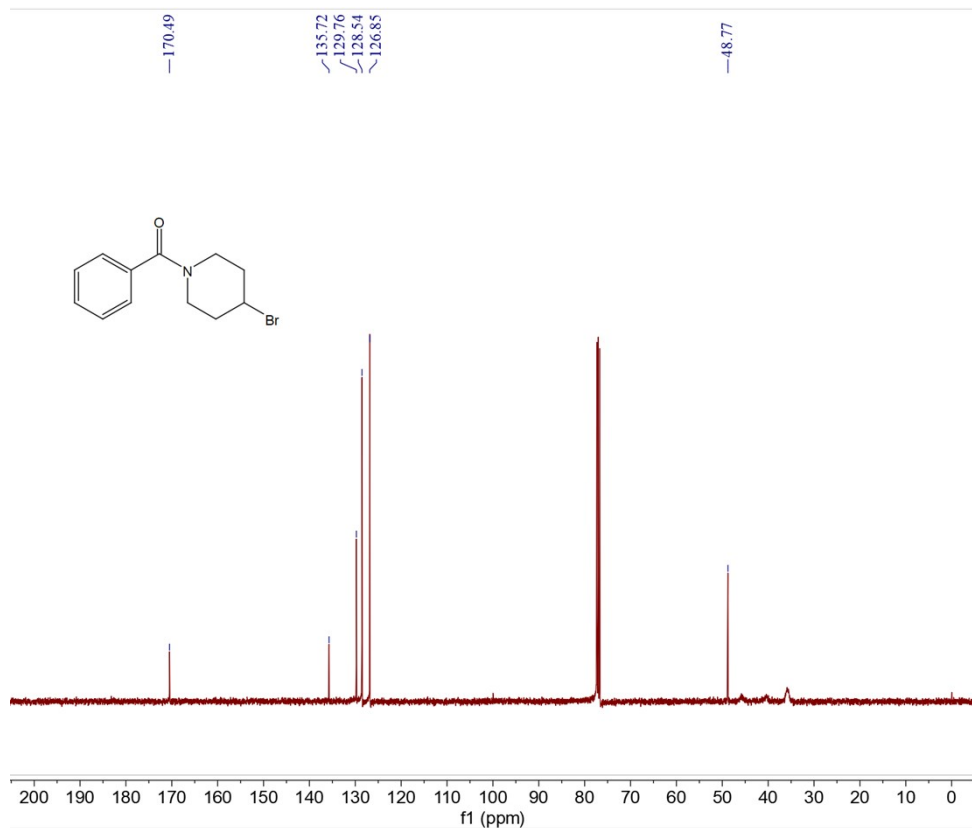

<sup>1</sup>H NMR of compound 27

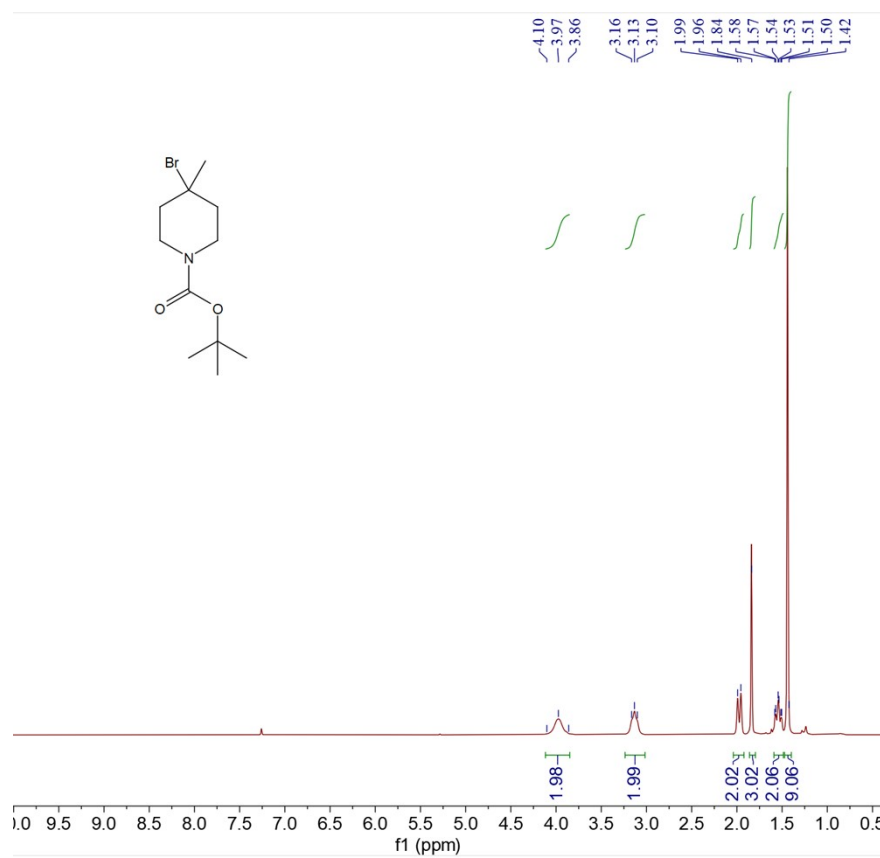

<sup>13</sup>C NMR of compound **27**

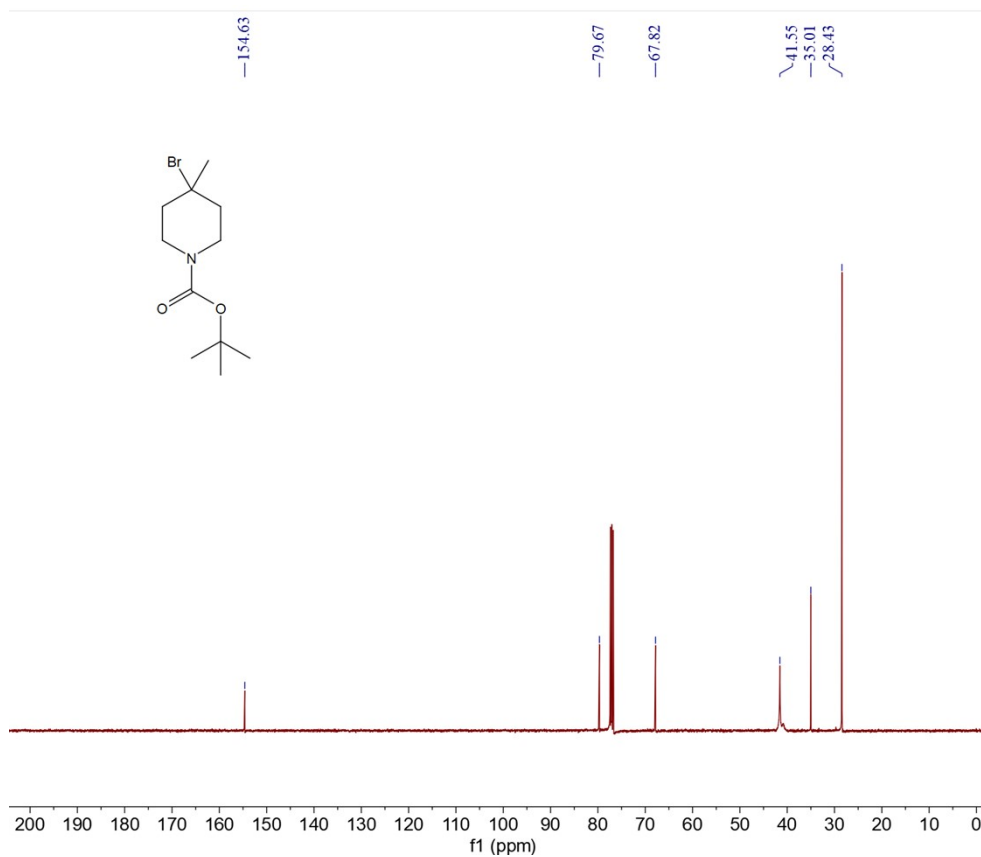

<sup>1</sup>H NMR of compound **28**

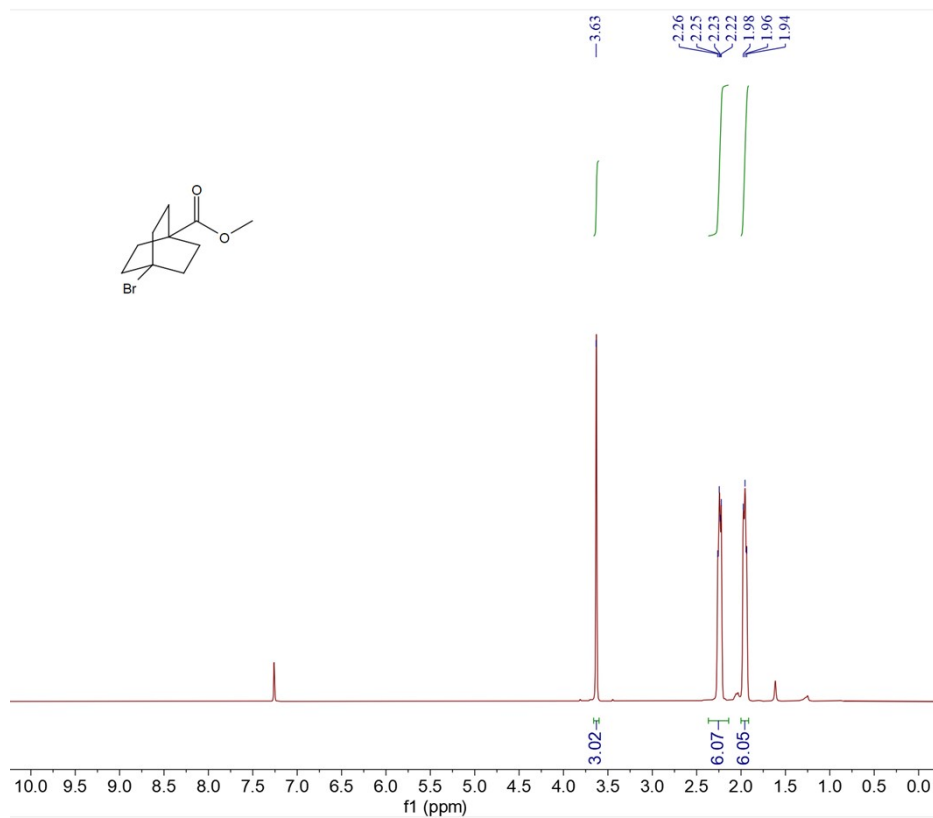

<sup>13</sup>C NMR of compound **28**

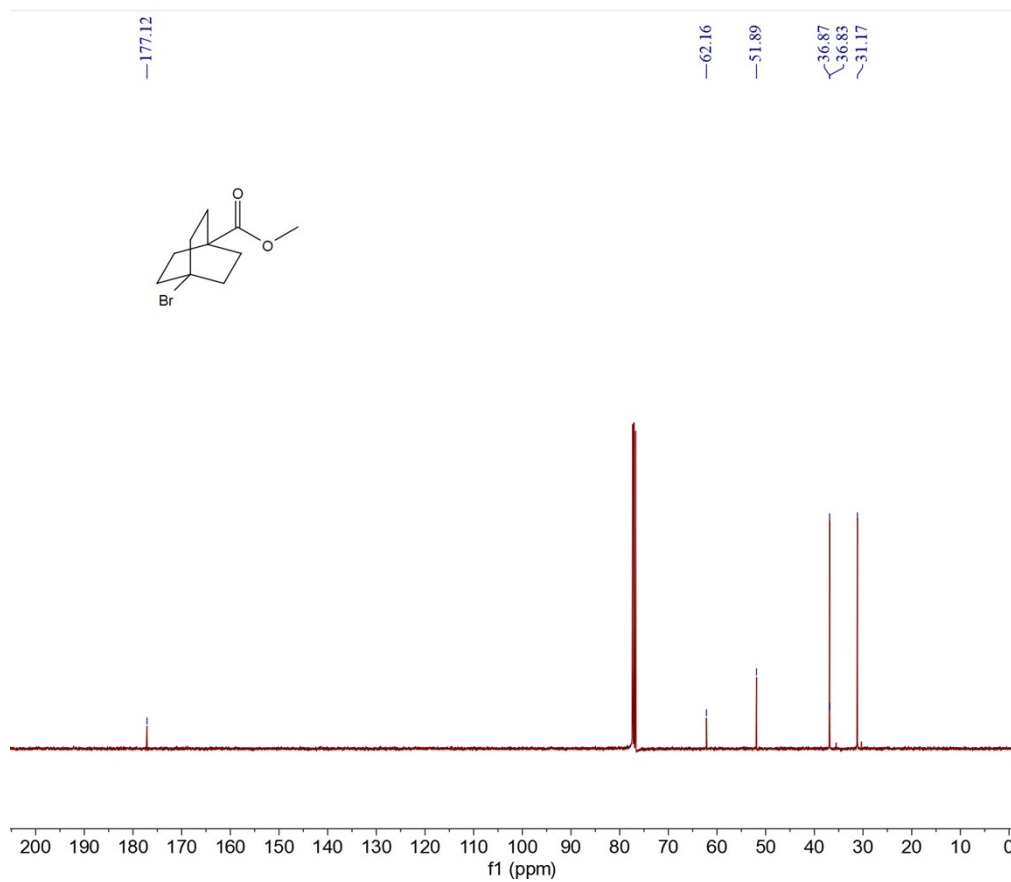

<sup>1</sup>H NMR of compound **29**

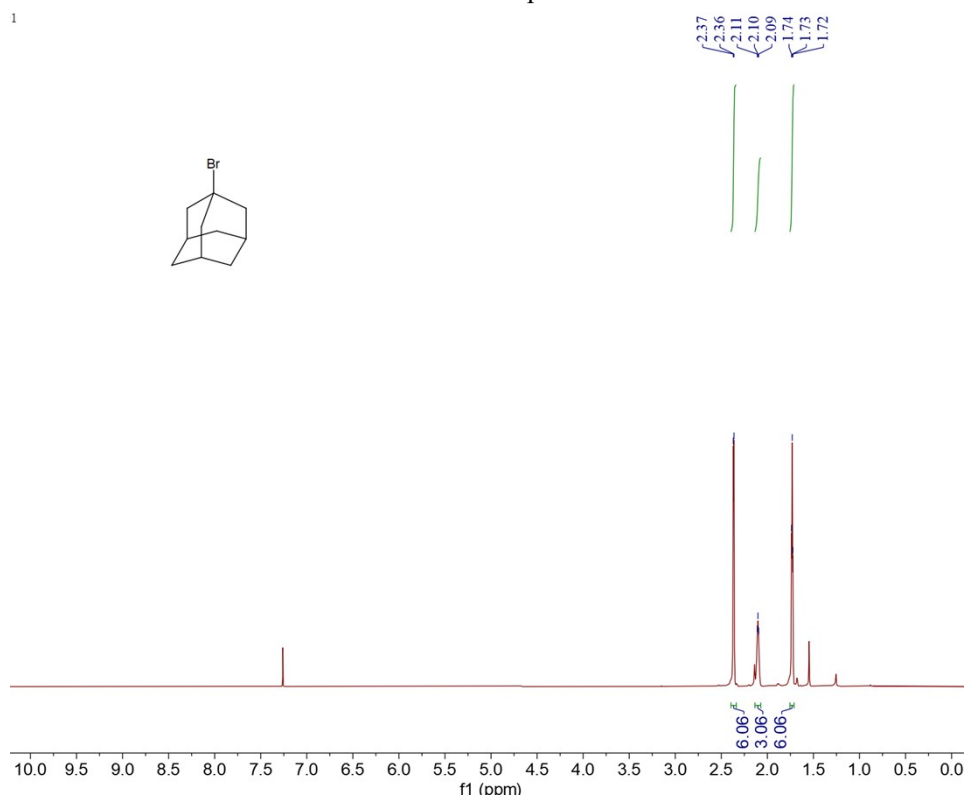

<sup>13</sup>C NMR of compound **29**

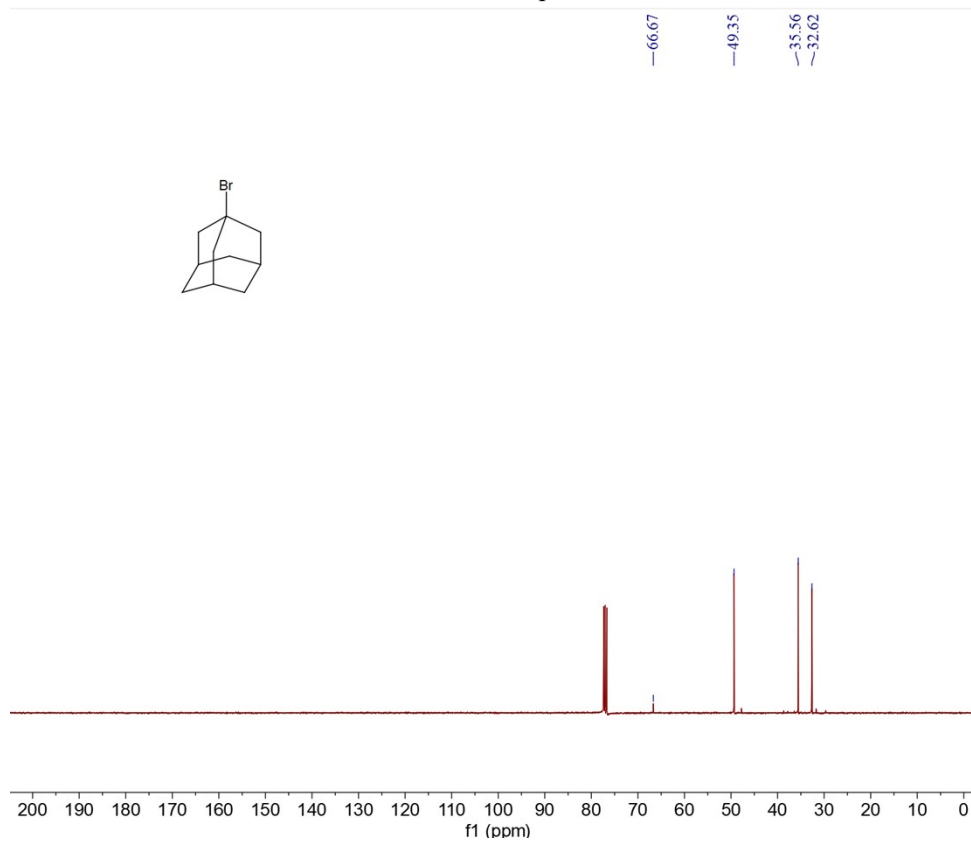

<sup>1</sup>H NMR of compound **30**

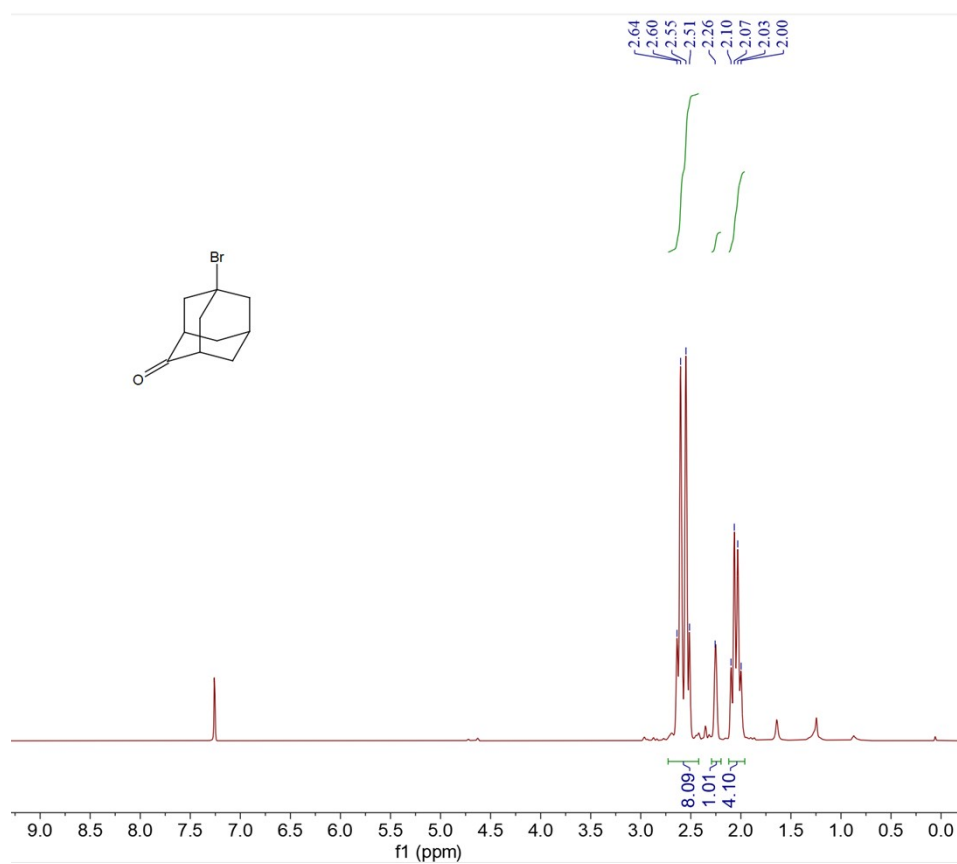

<sup>13</sup>C NMR of compound 30

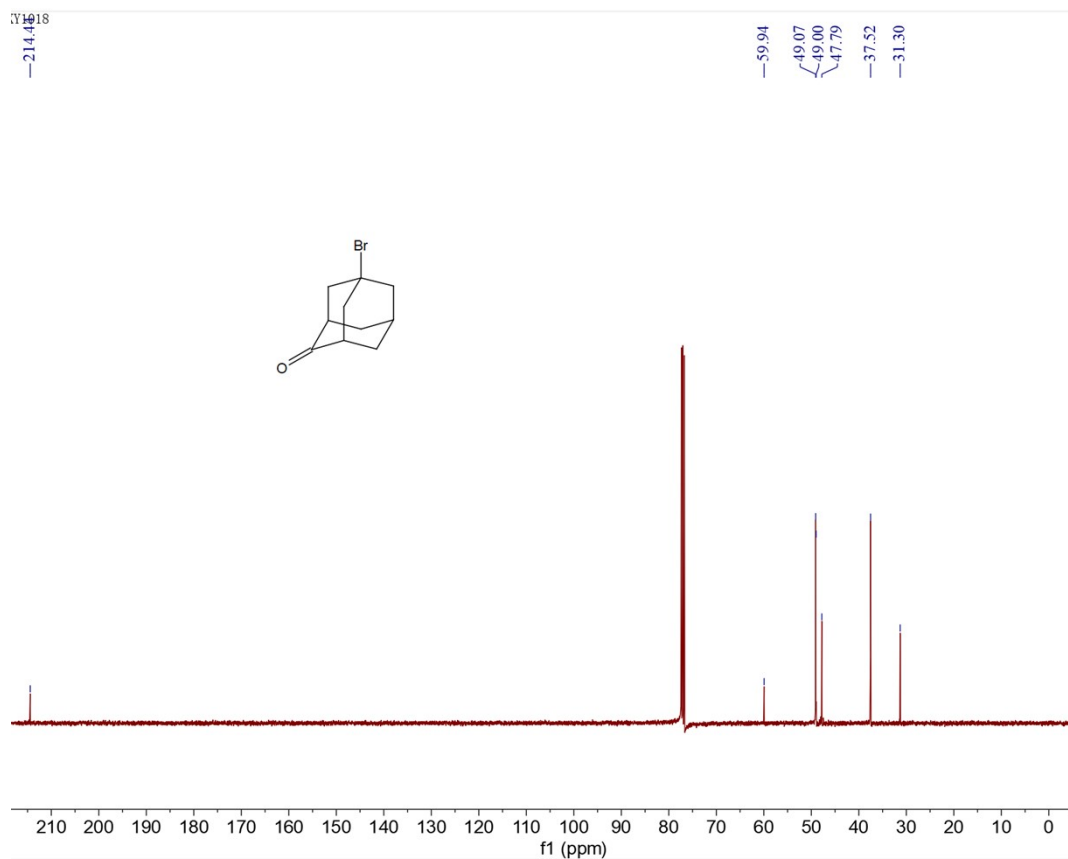

<sup>1</sup>H NMR of compound 31

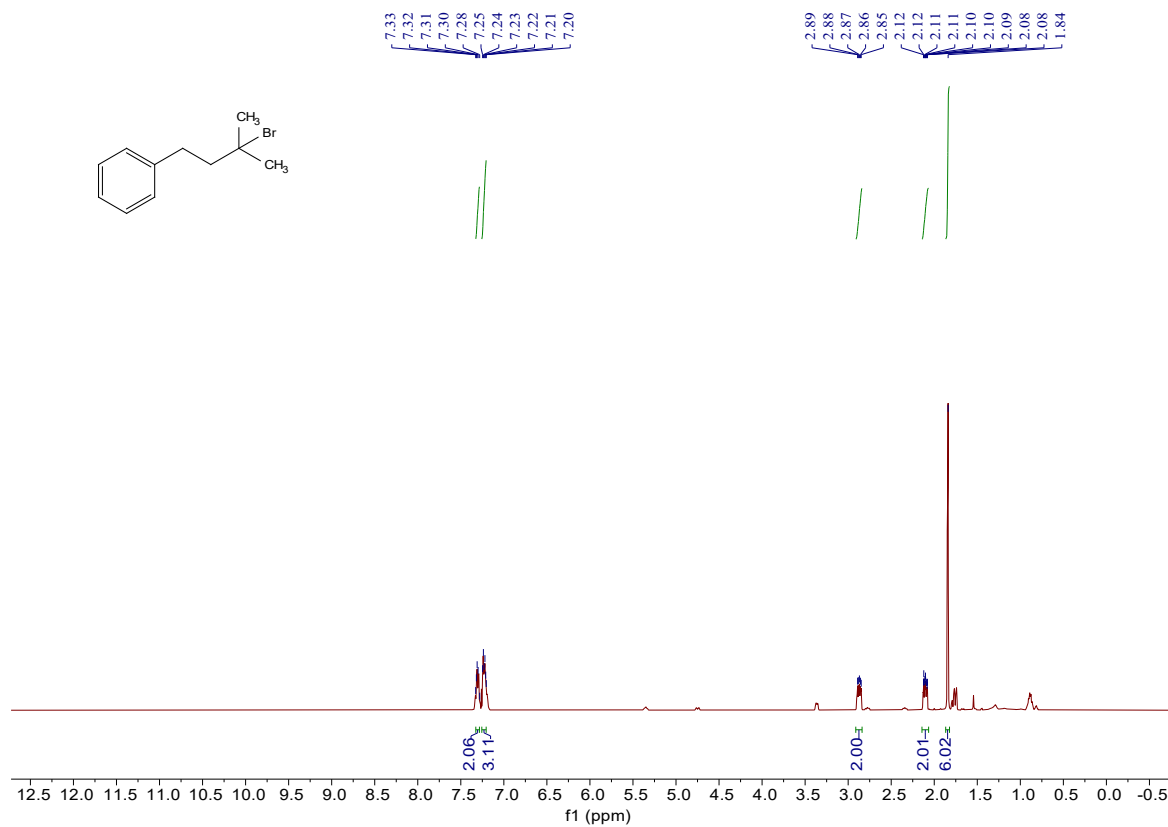



<sup>13</sup>C NMR of compound **31**

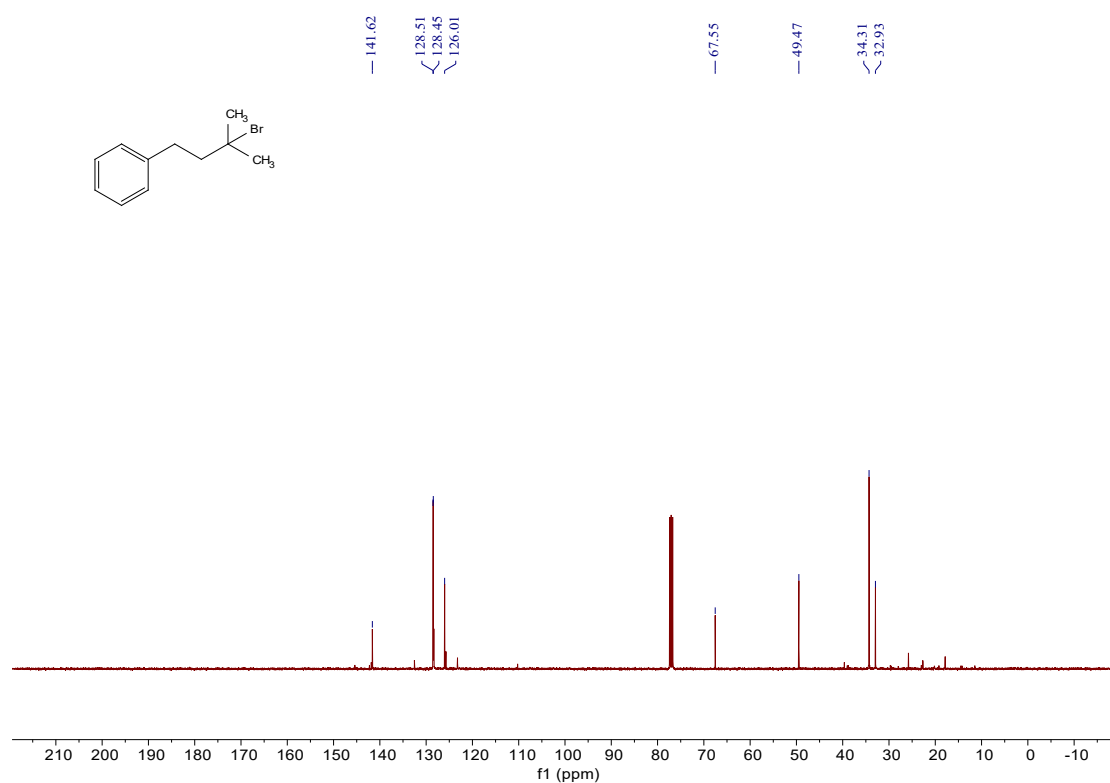

<sup>1</sup>H NMR of compound **32**

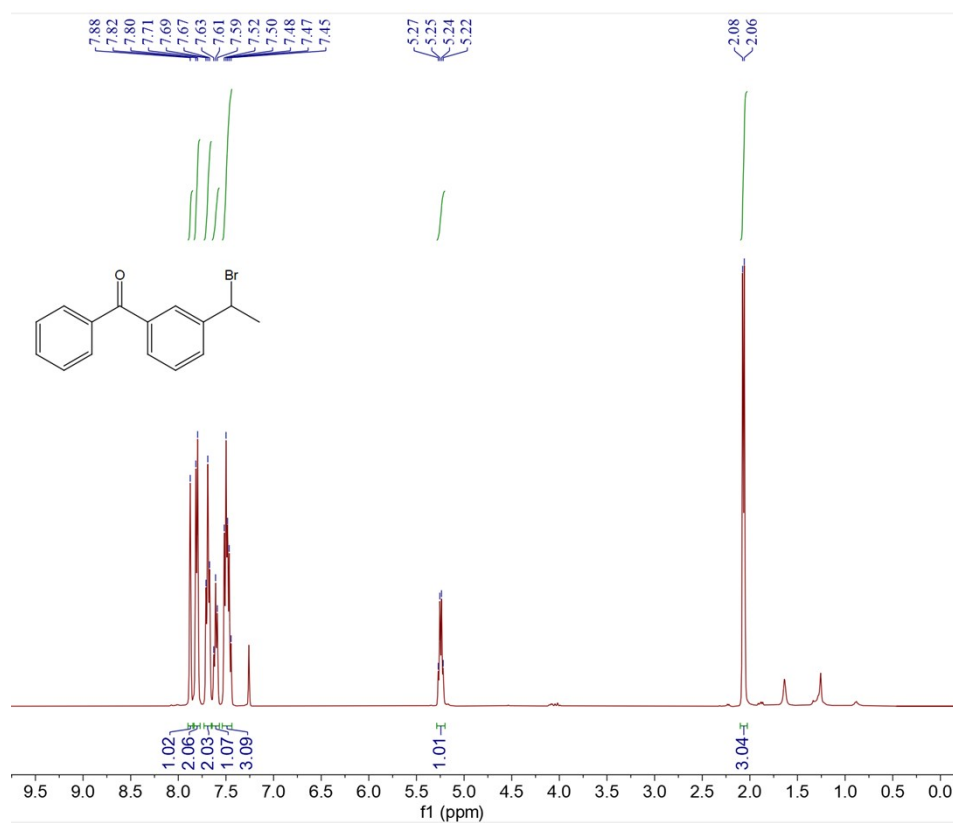

<sup>13</sup>C NMR of compound **32**

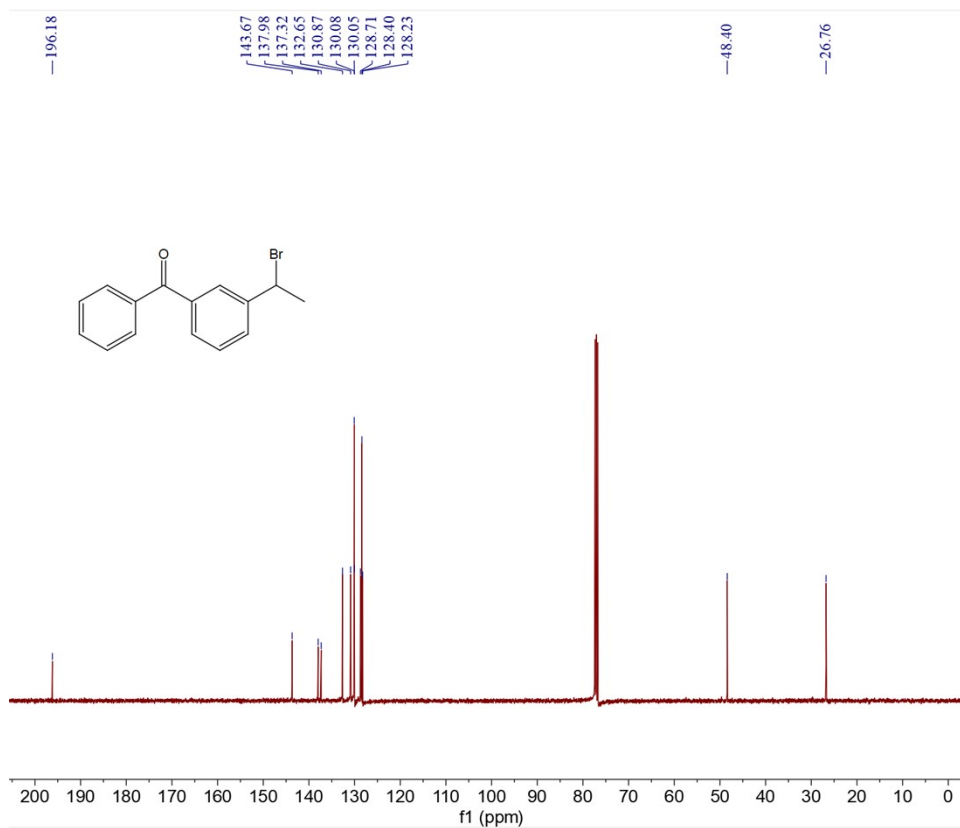

<sup>1</sup>H NMR of compound **33**

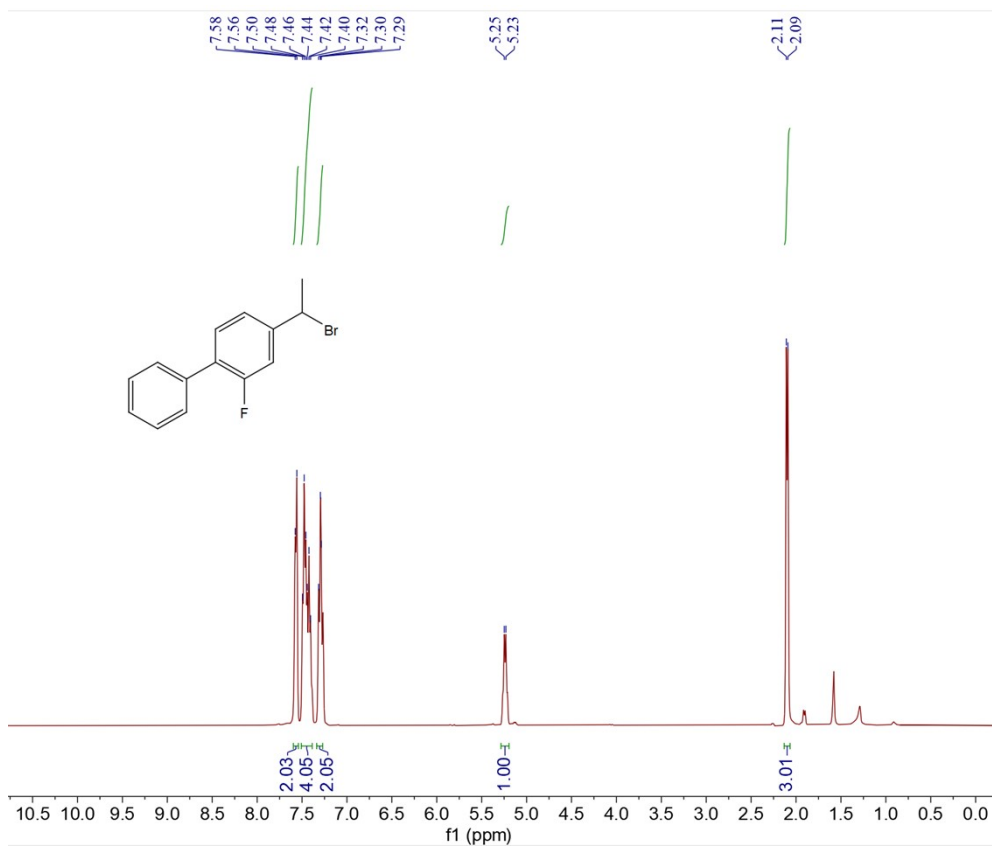

<sup>13</sup>C NMR of compound 33

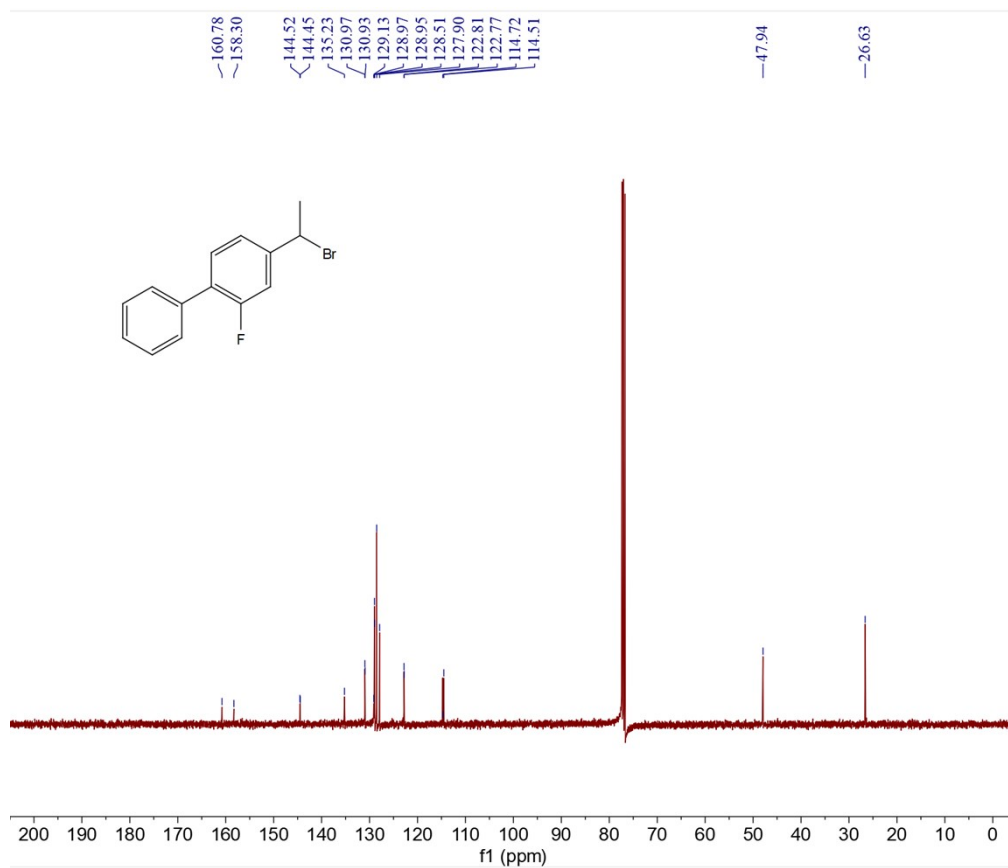

<sup>19</sup>F NMR of compound 33

0230414-2. 1. fid

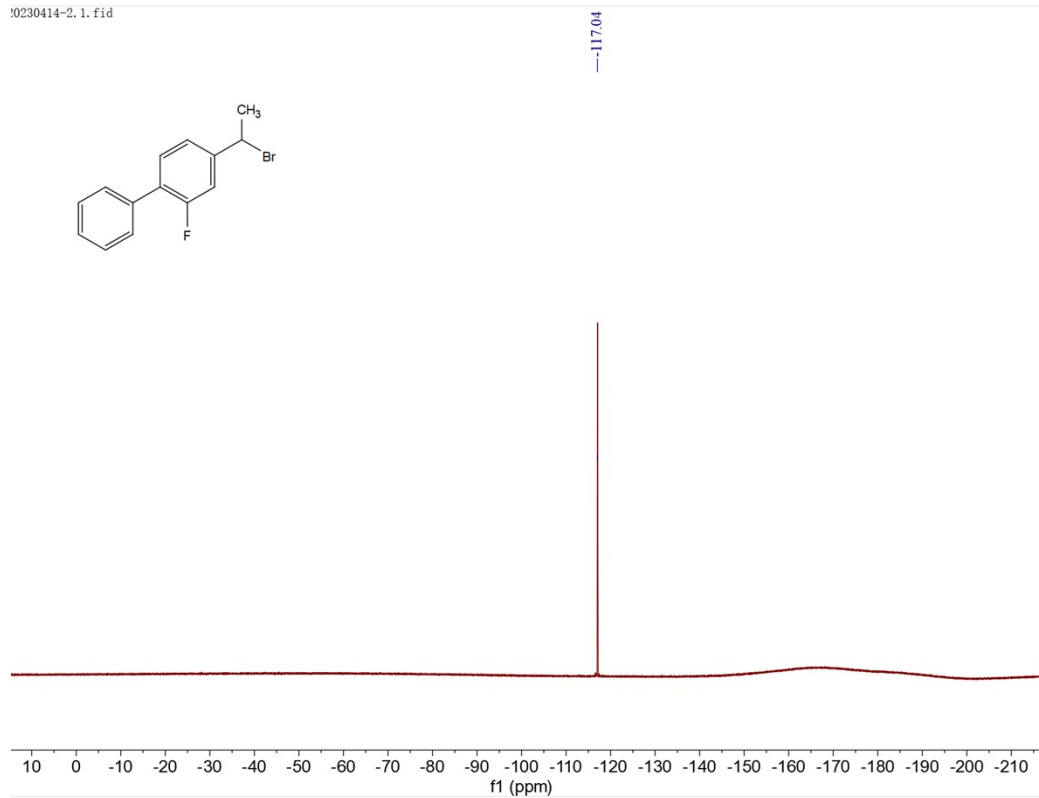

### <sup>1</sup>H NMR of compound 34

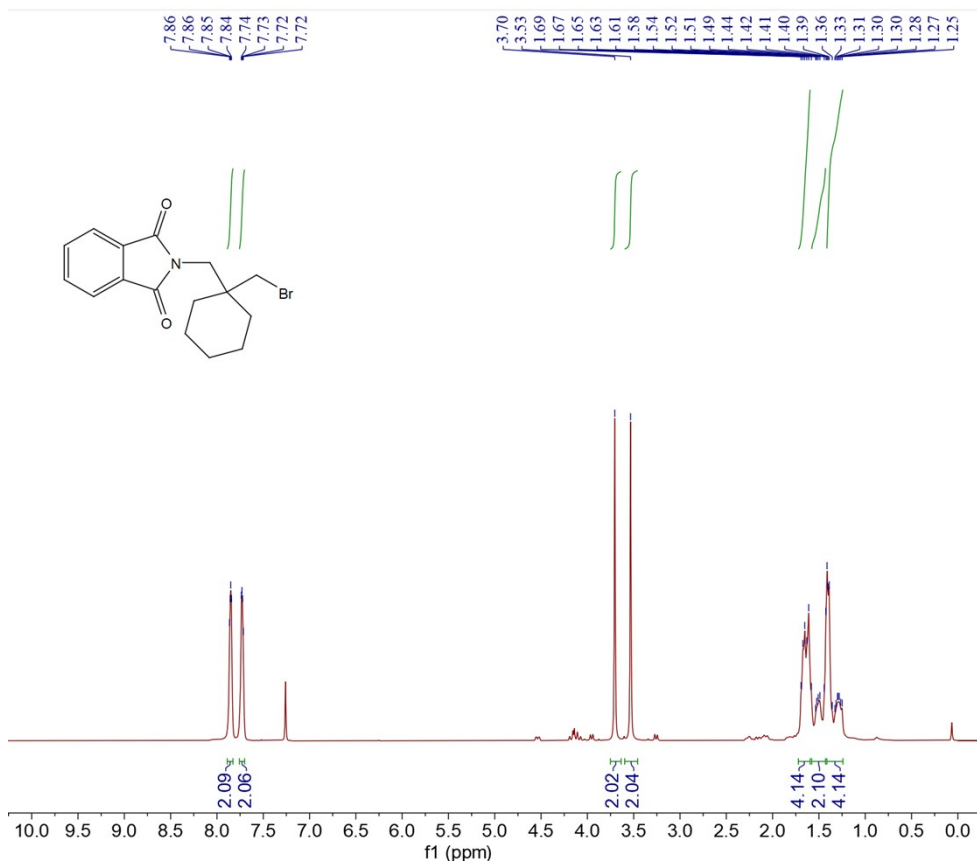

### <sup>13</sup>C NMR of compound 34

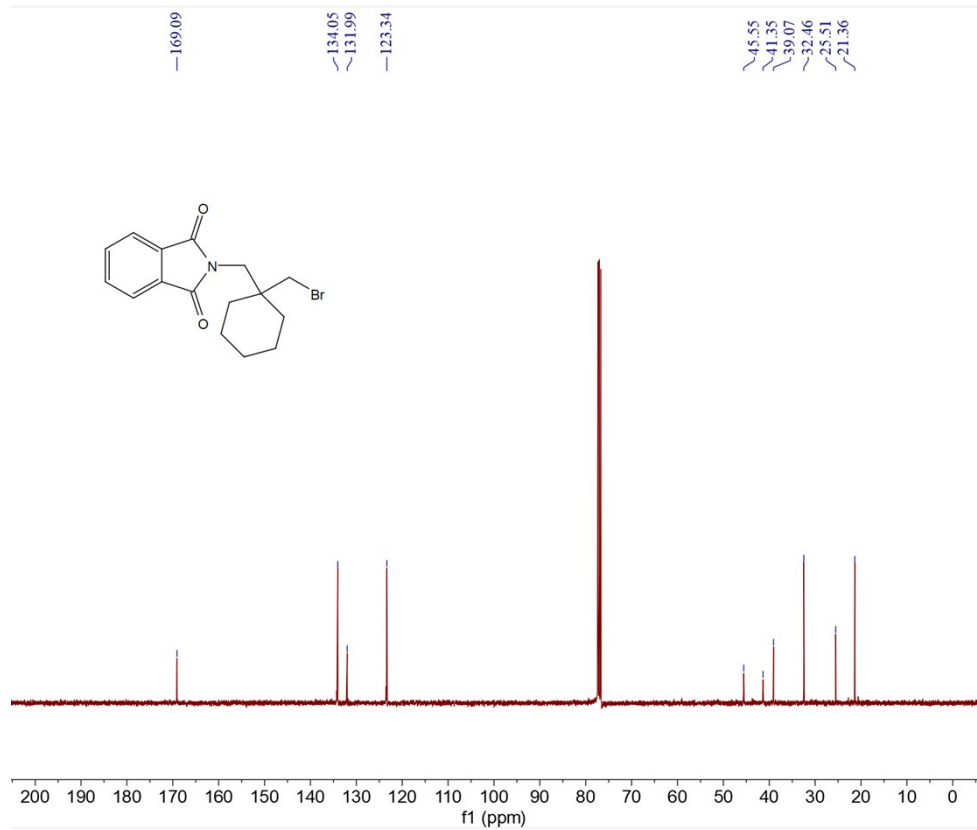

### <sup>1</sup>H NMR of compound 35

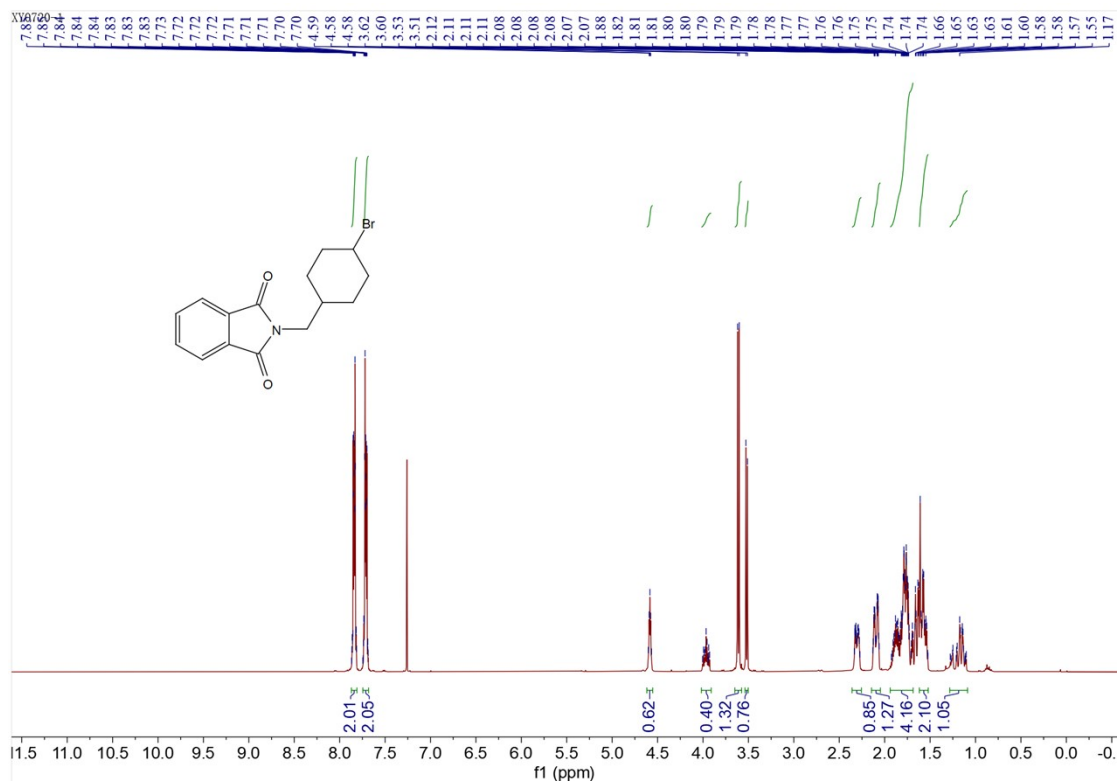

### <sup>13</sup>C NMR of compound 35

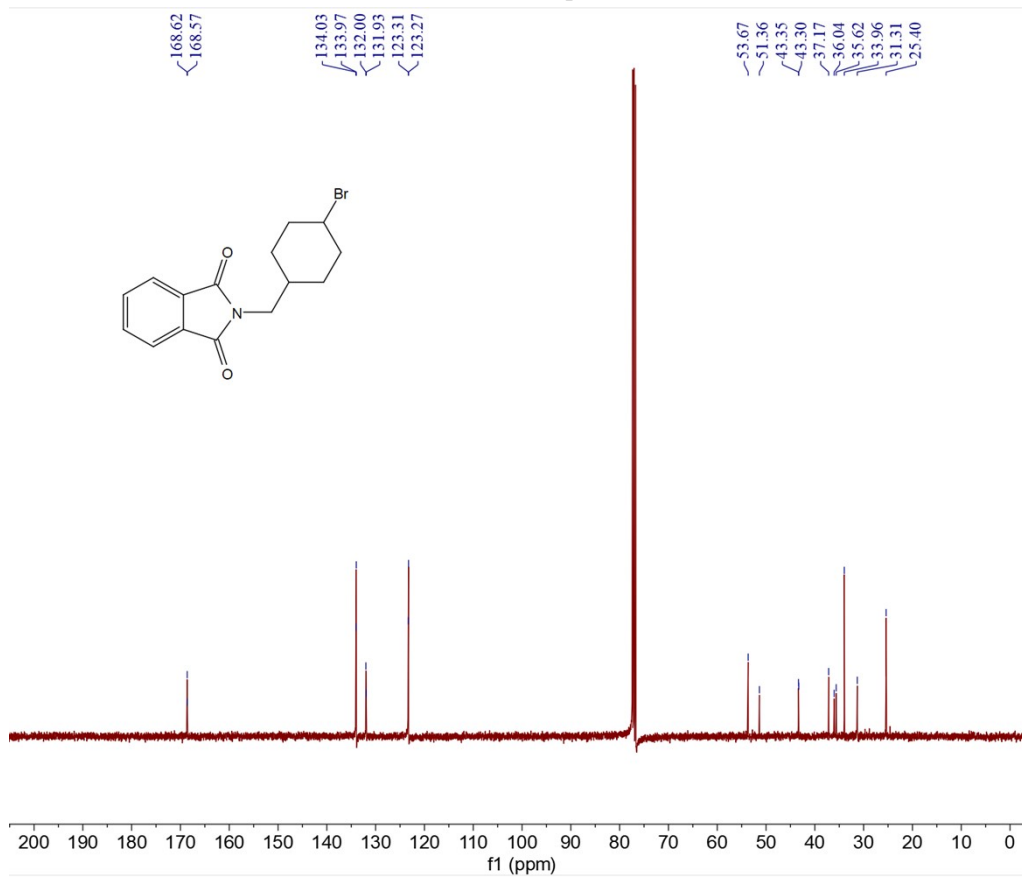

### <sup>1</sup>H NMR of compound 36

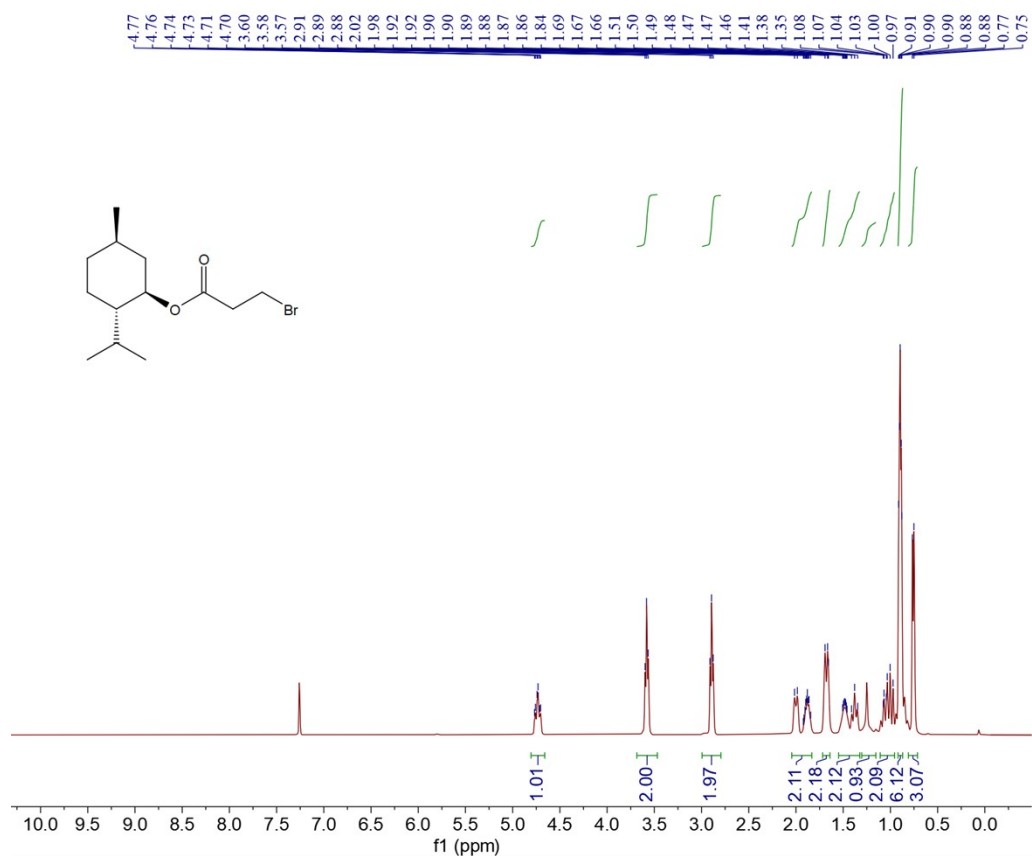

### <sup>13</sup>C NMR of compound 36

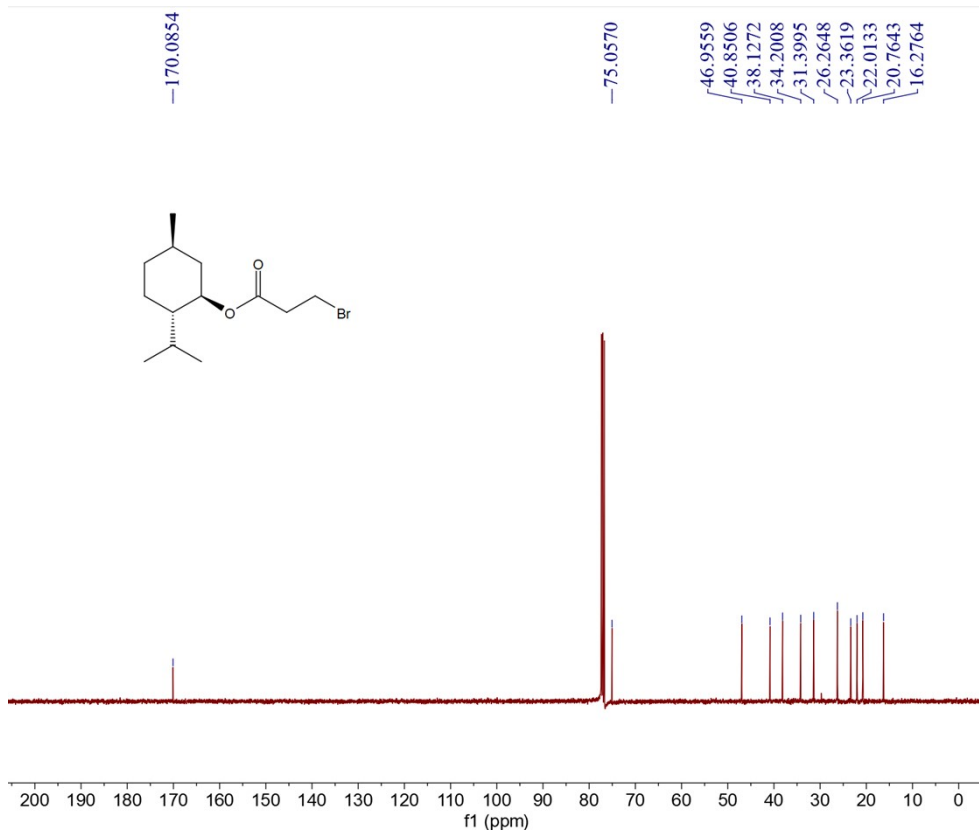

### <sup>1</sup>H NMR of compound 37

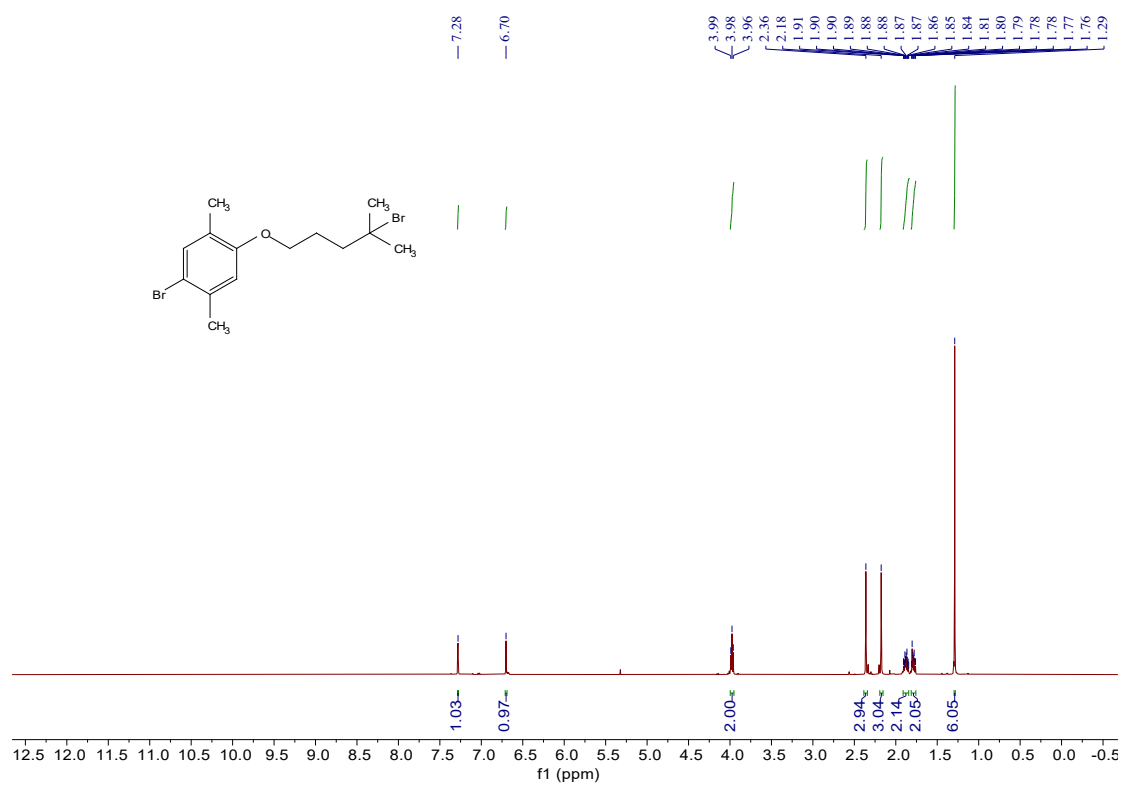

### <sup>13</sup>C NMR of compound 37

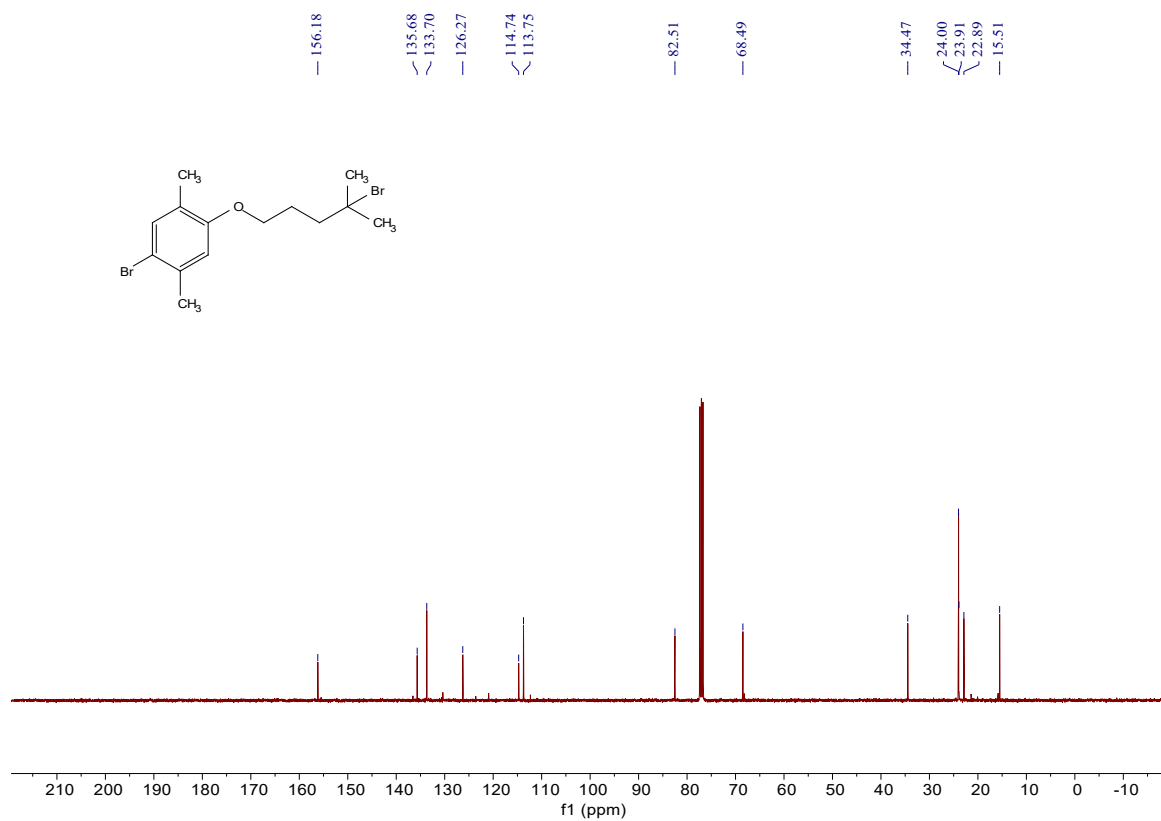

### <sup>1</sup>H NMR of compound 38

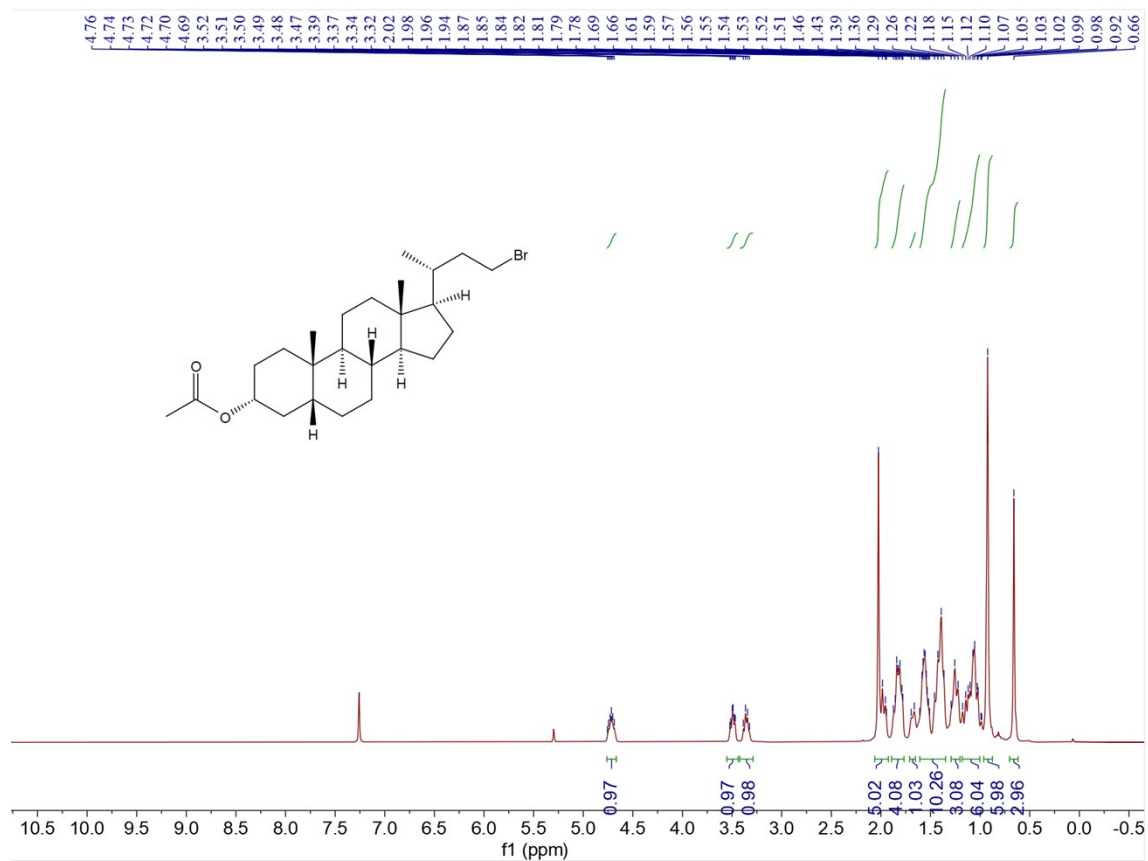

### <sup>13</sup>C NMR of compound 38

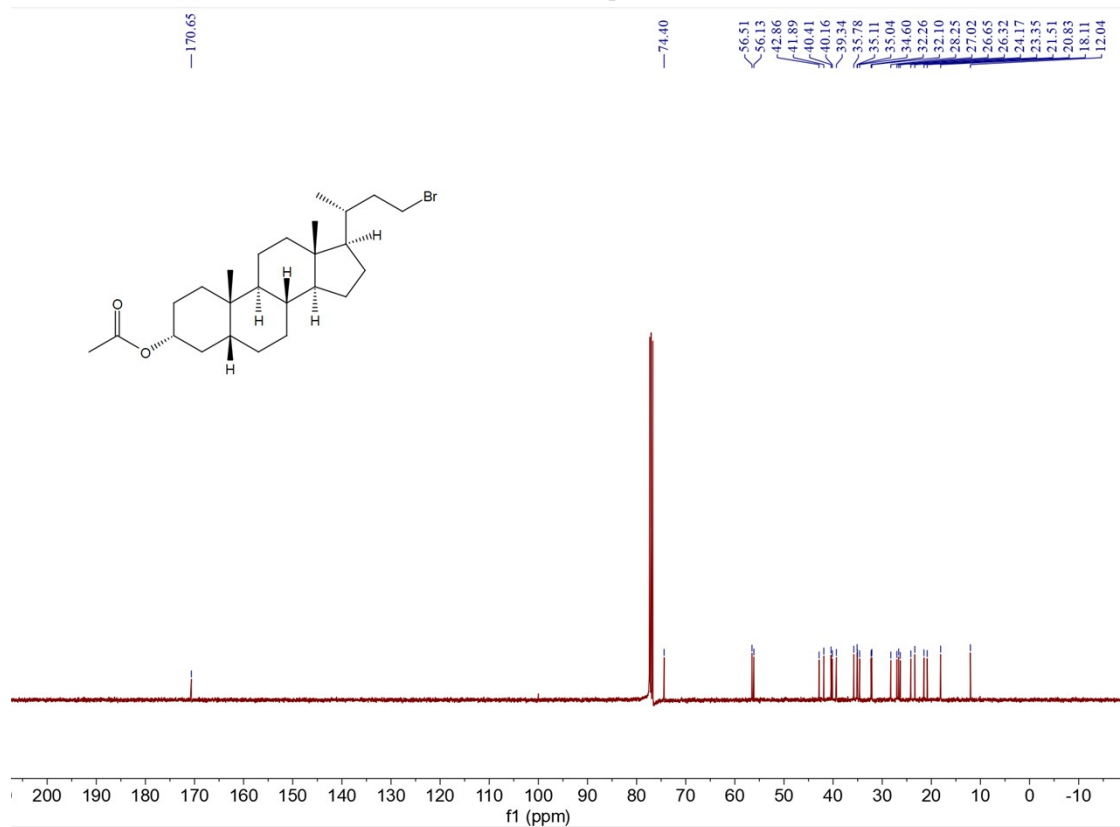



### <sup>1</sup>H NMR of compound 39

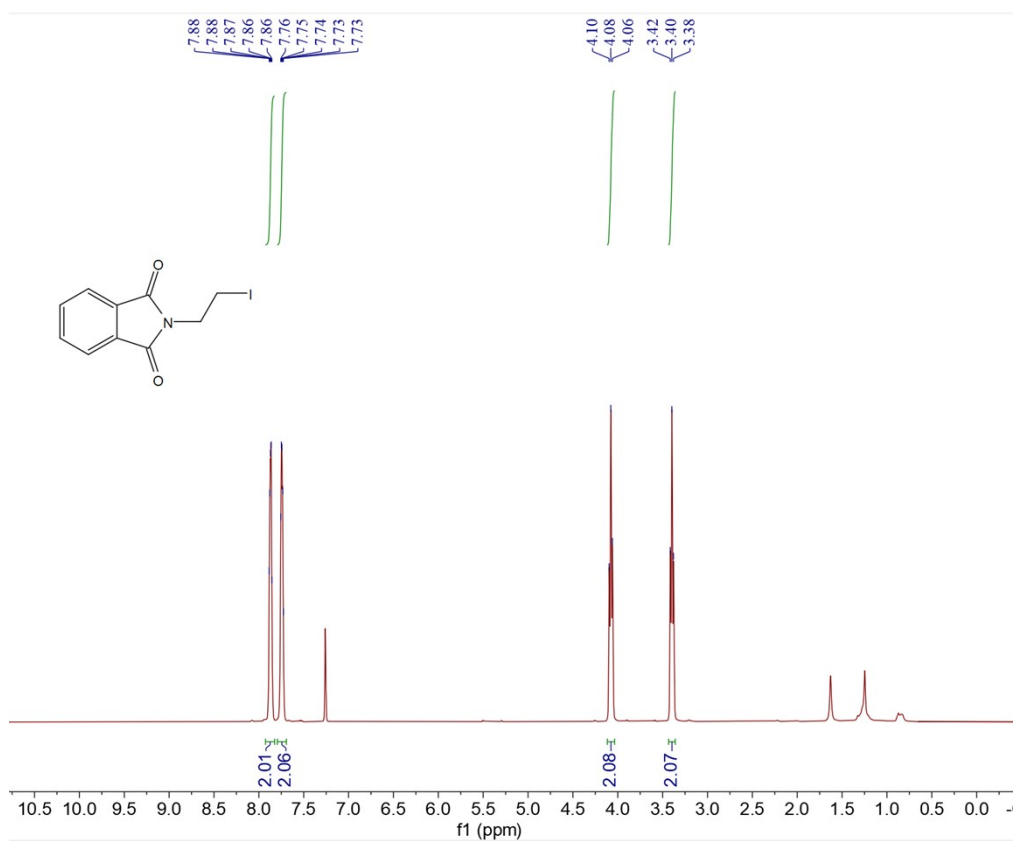

### <sup>13</sup>C NMR of compound 39

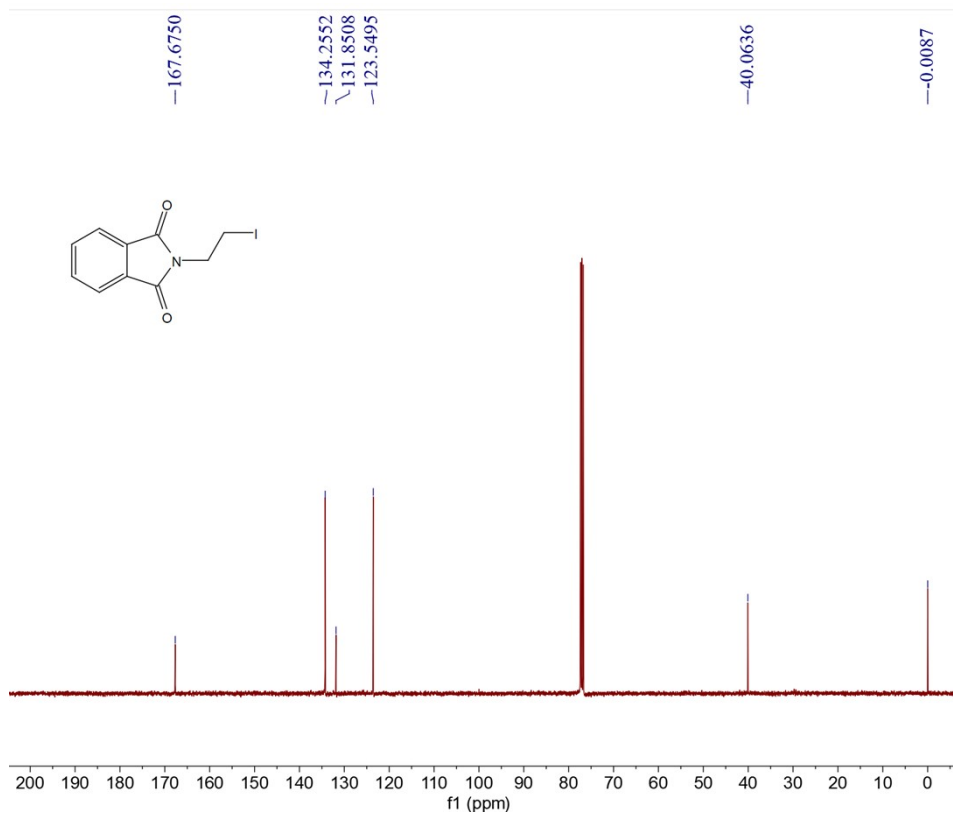

### <sup>1</sup>H NMR of compound 40

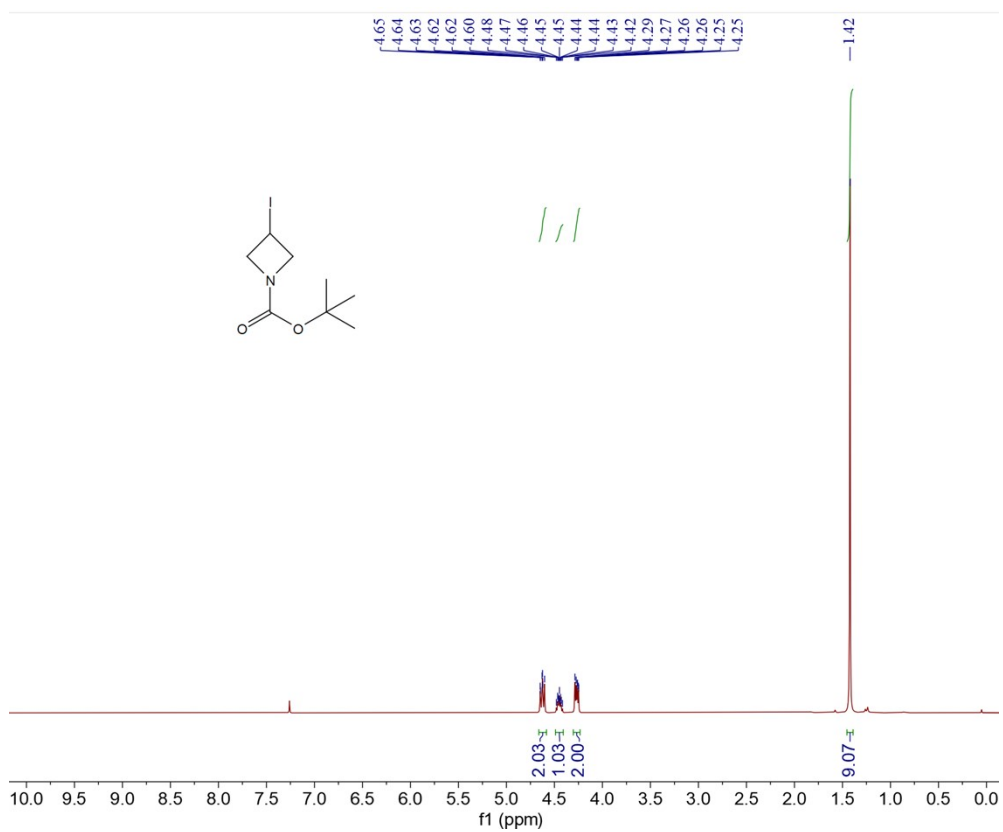

### <sup>13</sup>C NMR of compound 40

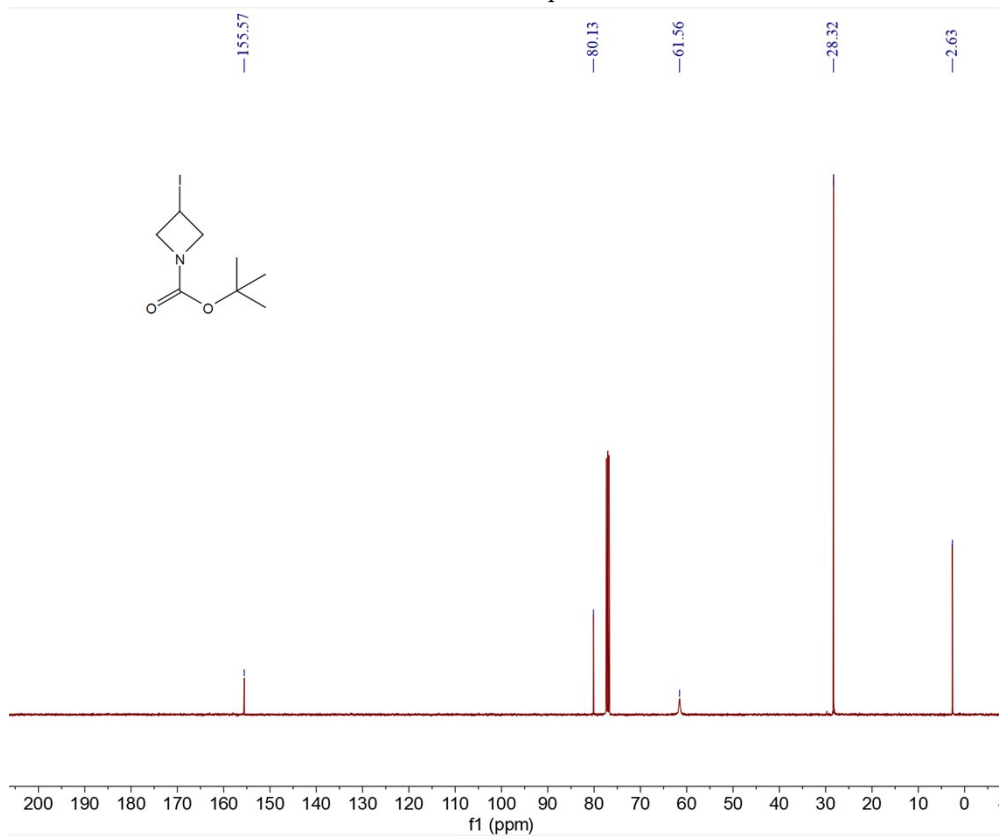

2-1

<sup>1</sup>H NMR of compound 41

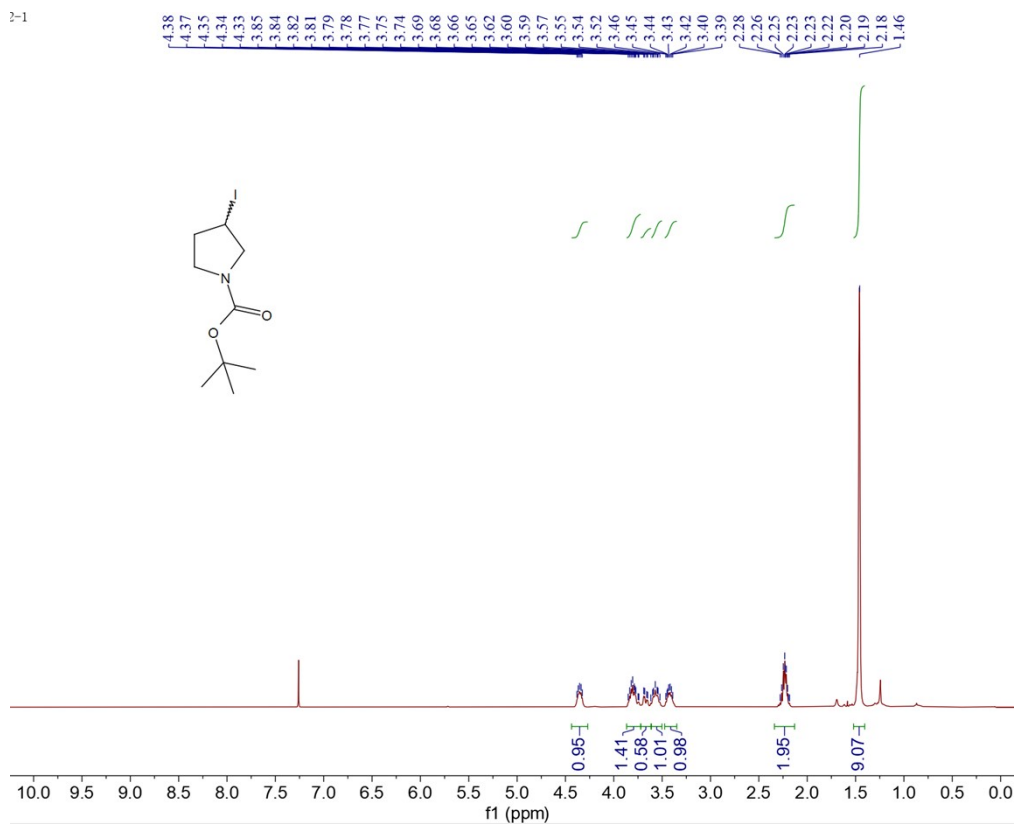

<sup>13</sup>C NMR of compound 41

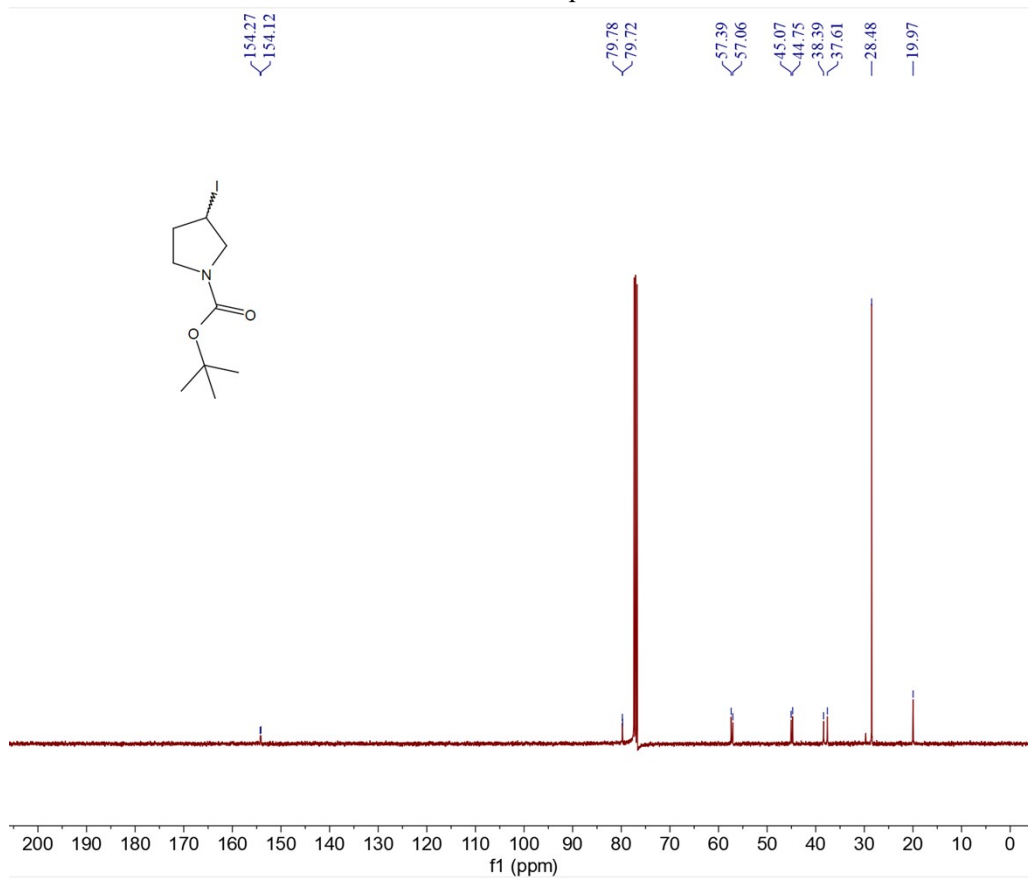

### <sup>1</sup>H NMR of compound 42

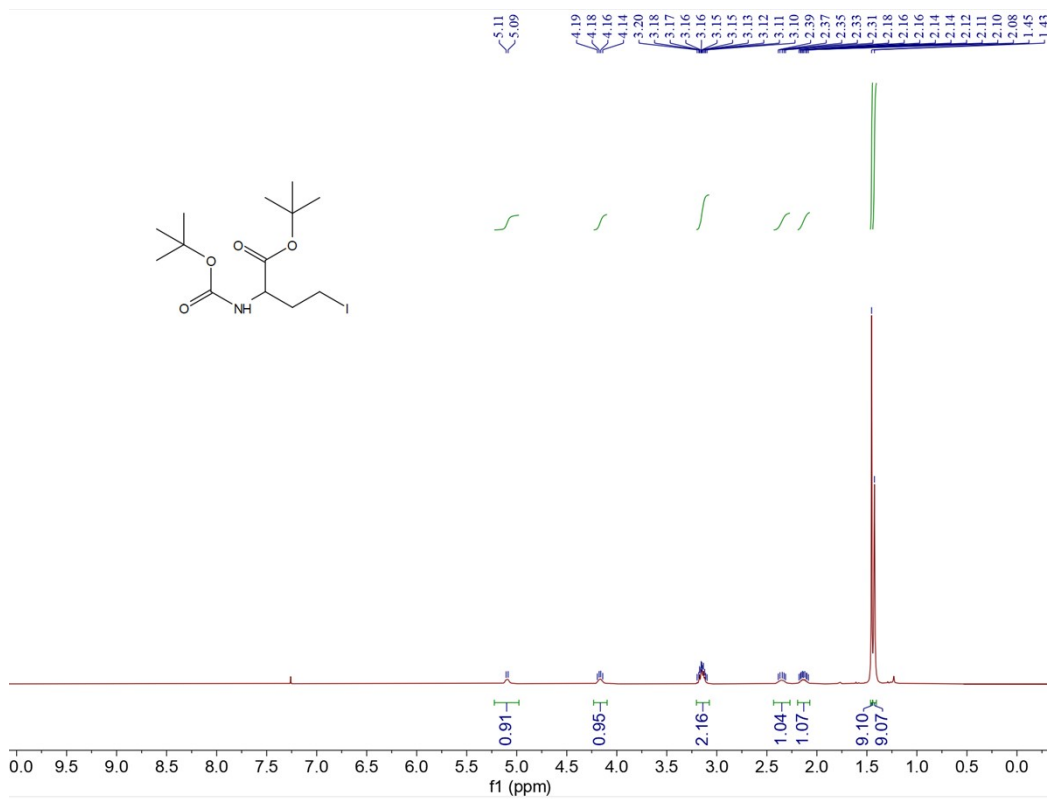

### <sup>13</sup>C NMR of compound 42

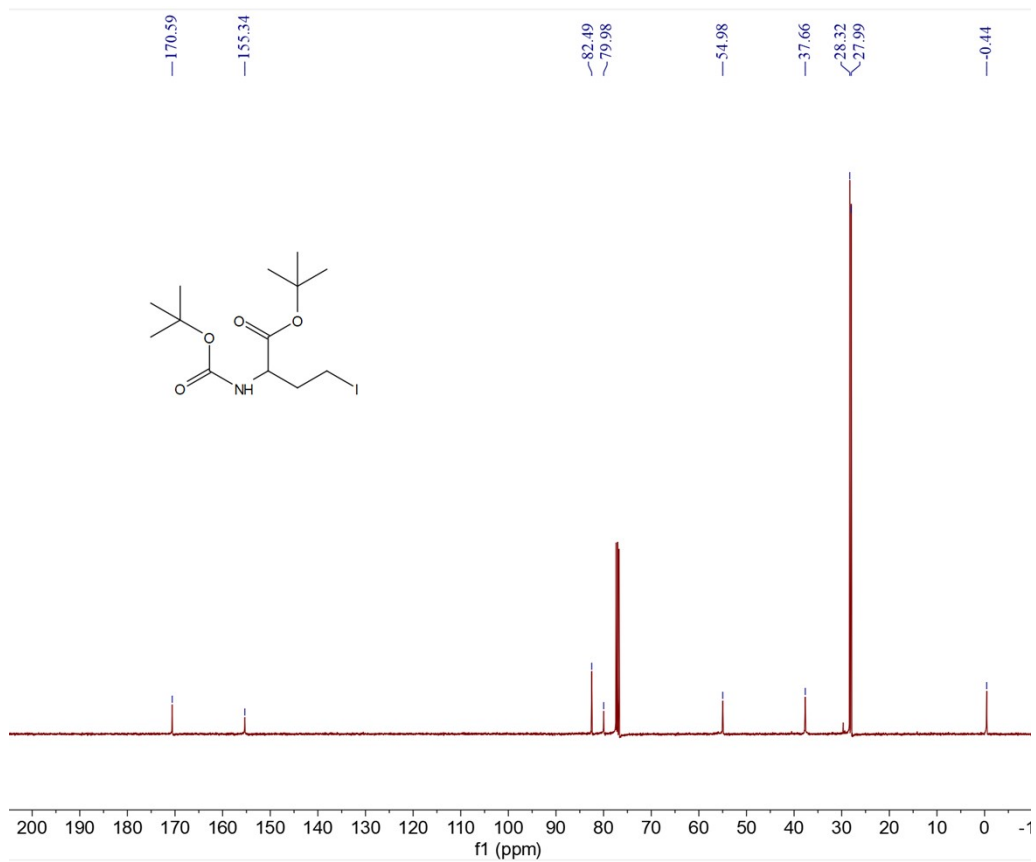

### <sup>1</sup>H NMR of compound 43

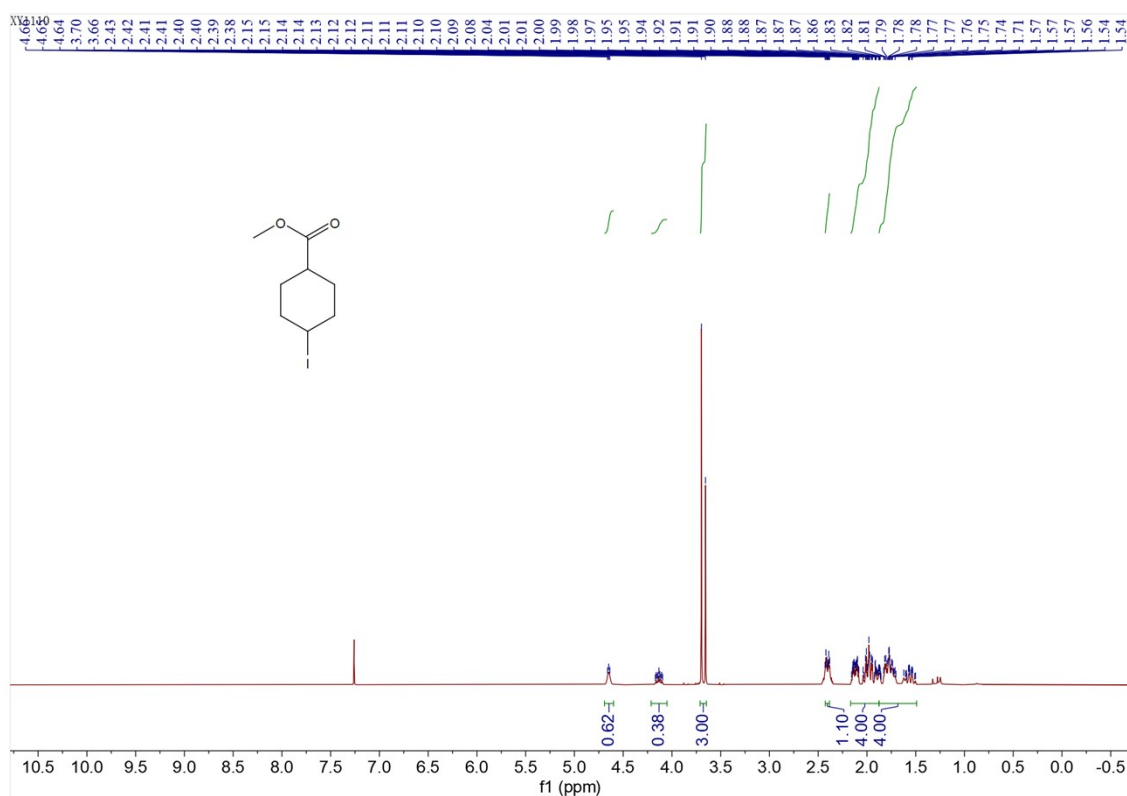

### <sup>13</sup>C NMR of compound 43

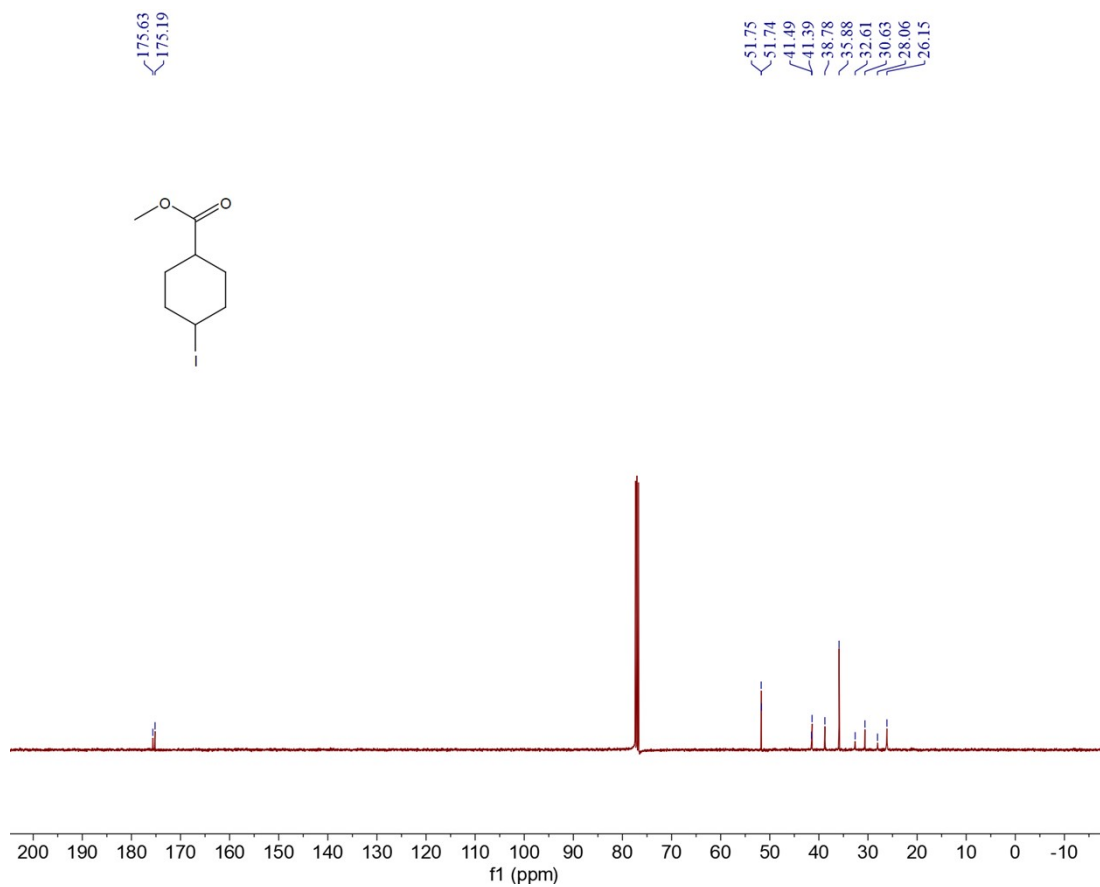

### <sup>1</sup>H NMR of compound 44

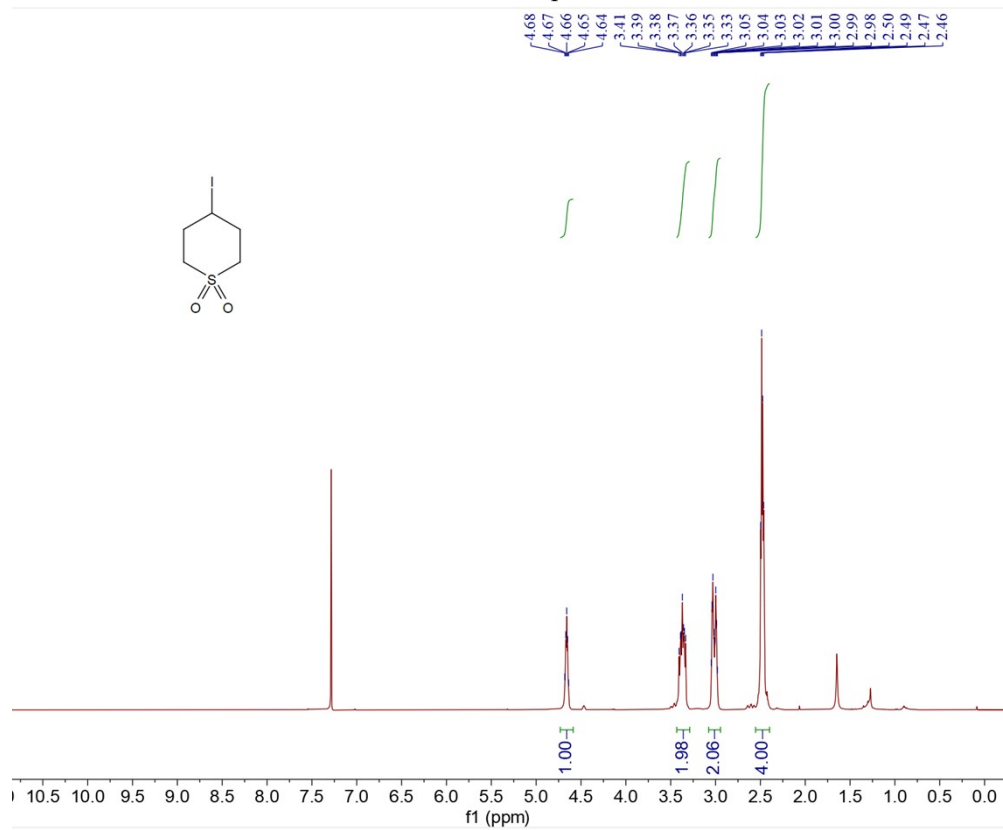

### <sup>13</sup>C NMR of compound 44

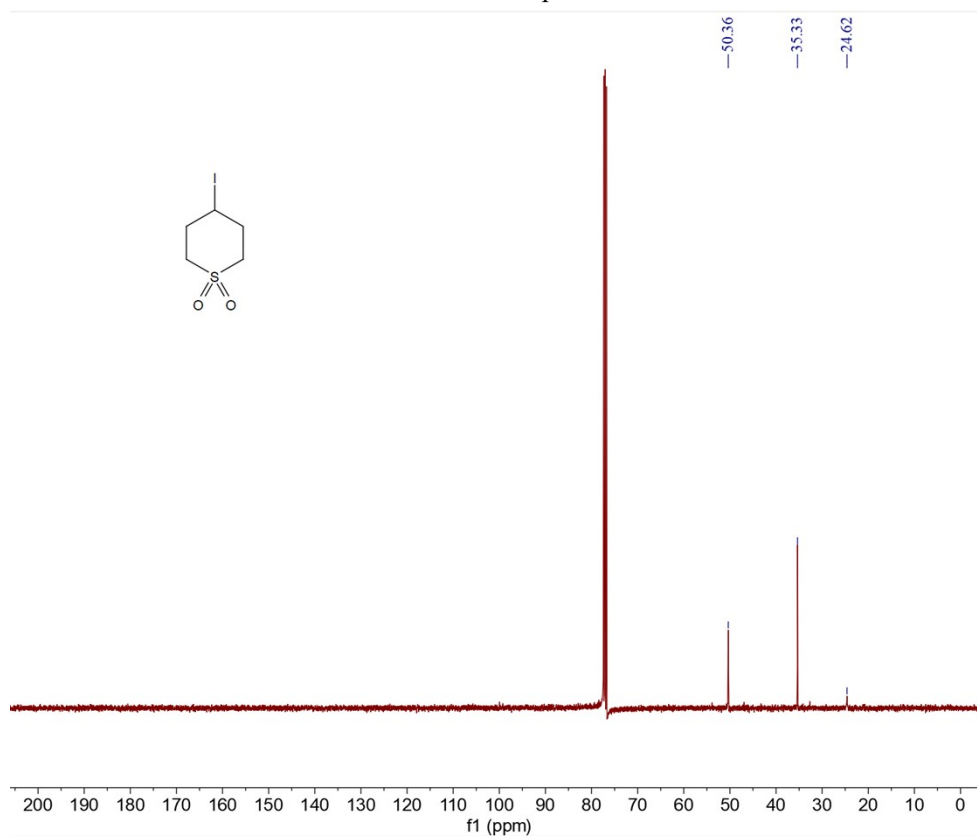

### <sup>1</sup>H NMR of compound 45

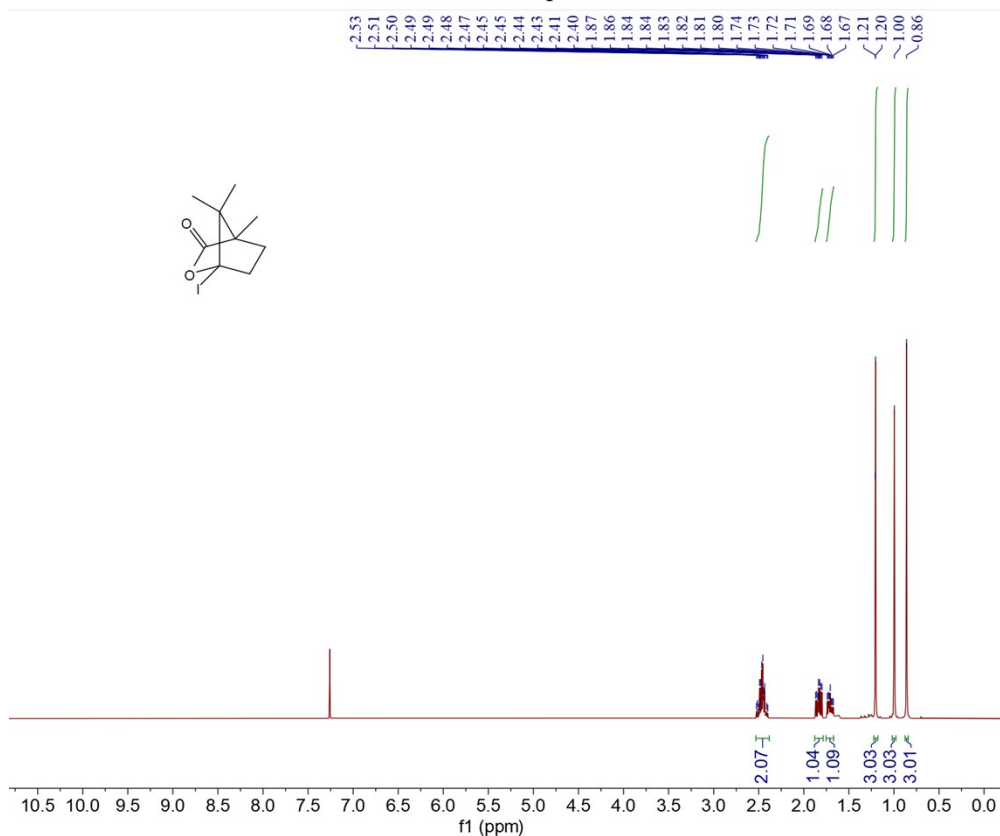

### <sup>13</sup>C NMR of compound 45

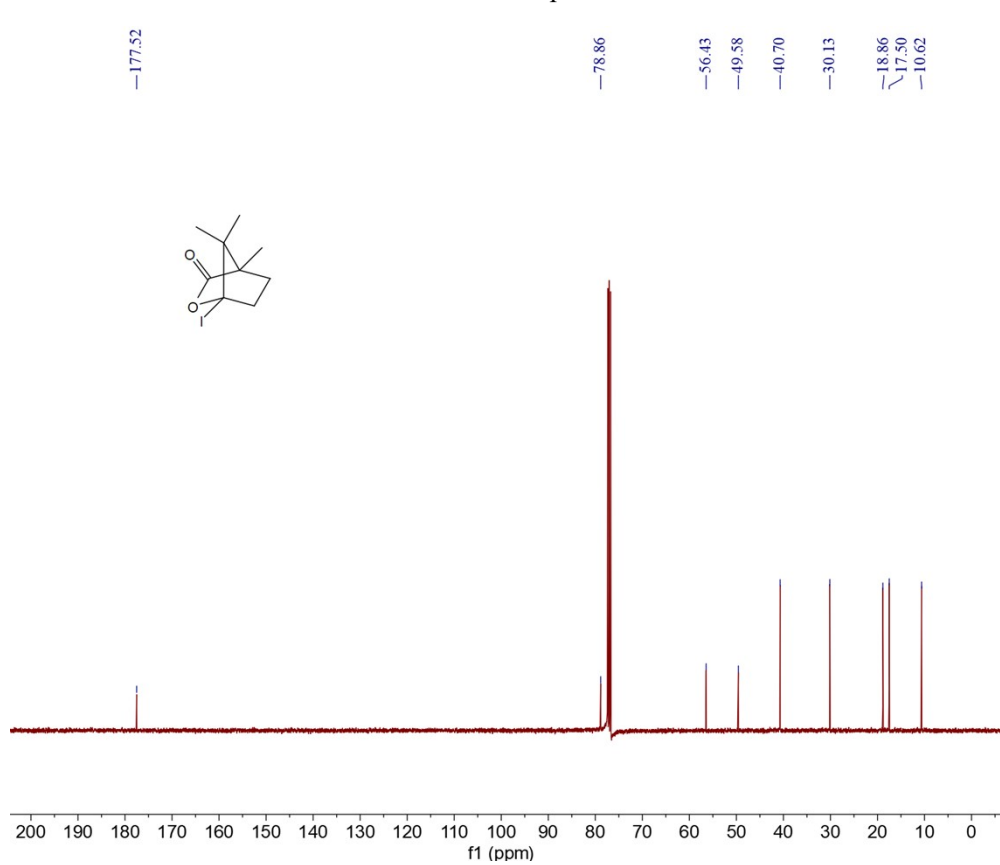

### <sup>1</sup>H NMR of compound 46

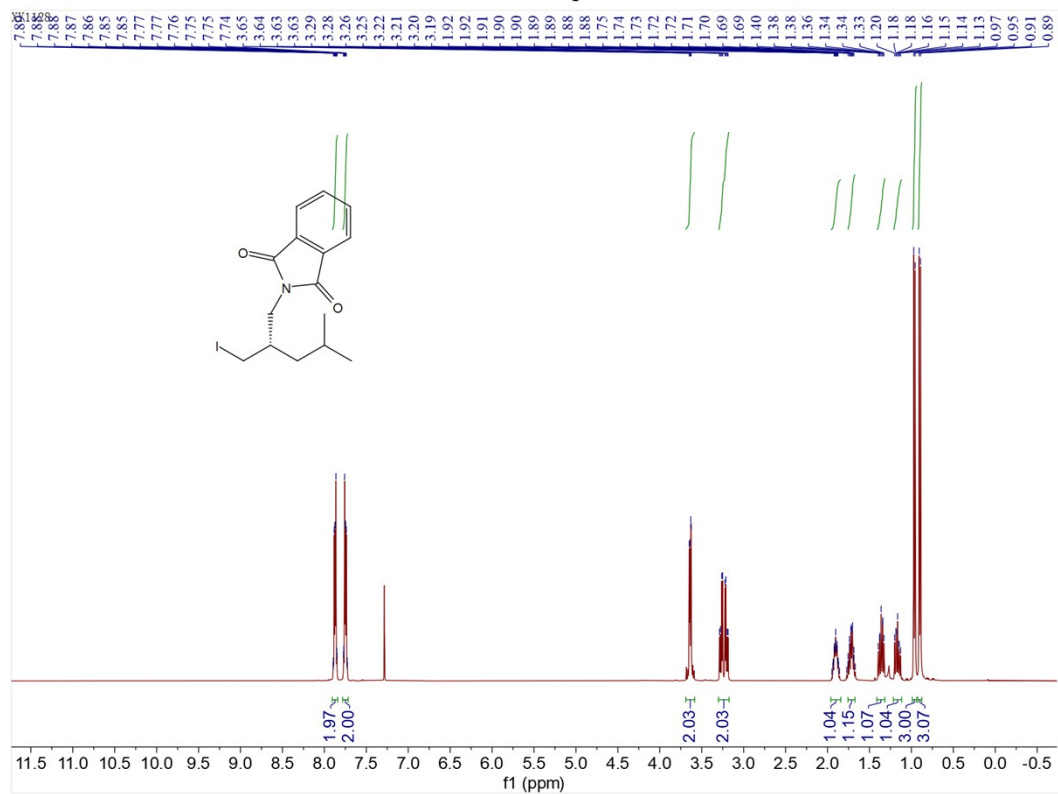

### <sup>13</sup>C NMR of compound 46

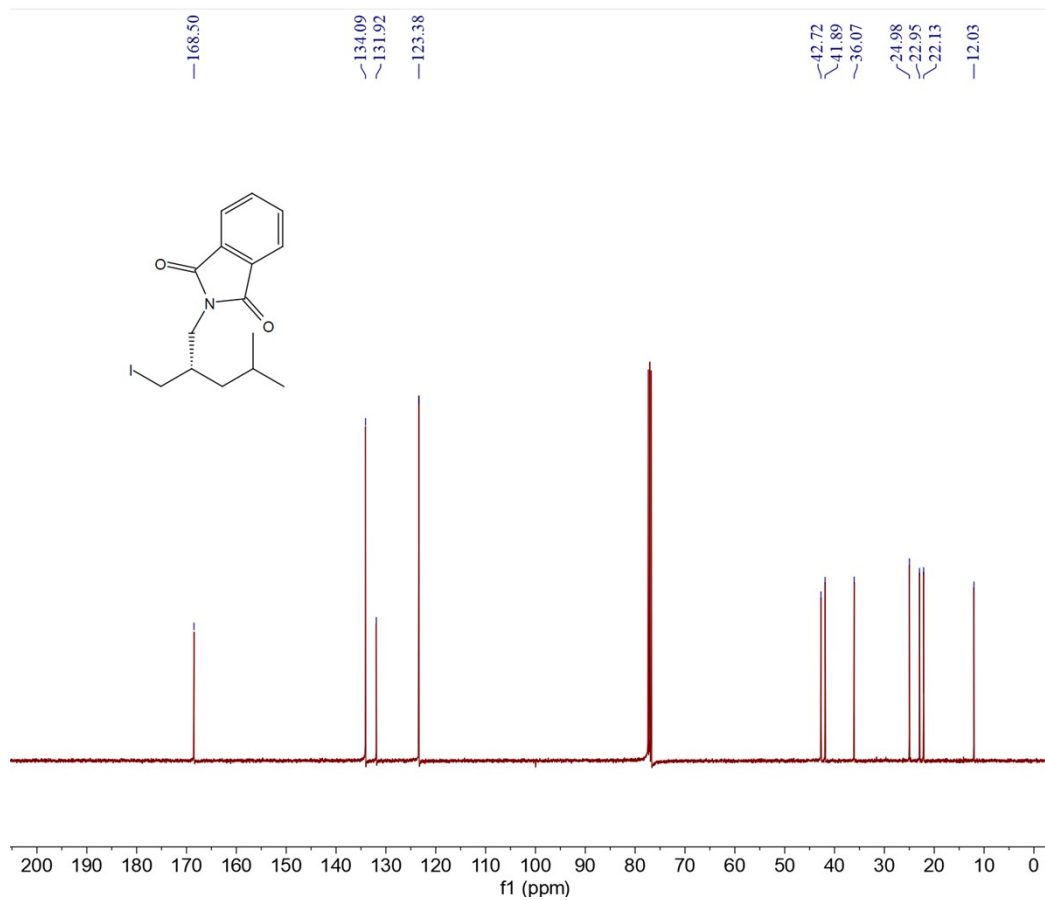



### <sup>1</sup>H NMR of compound 47

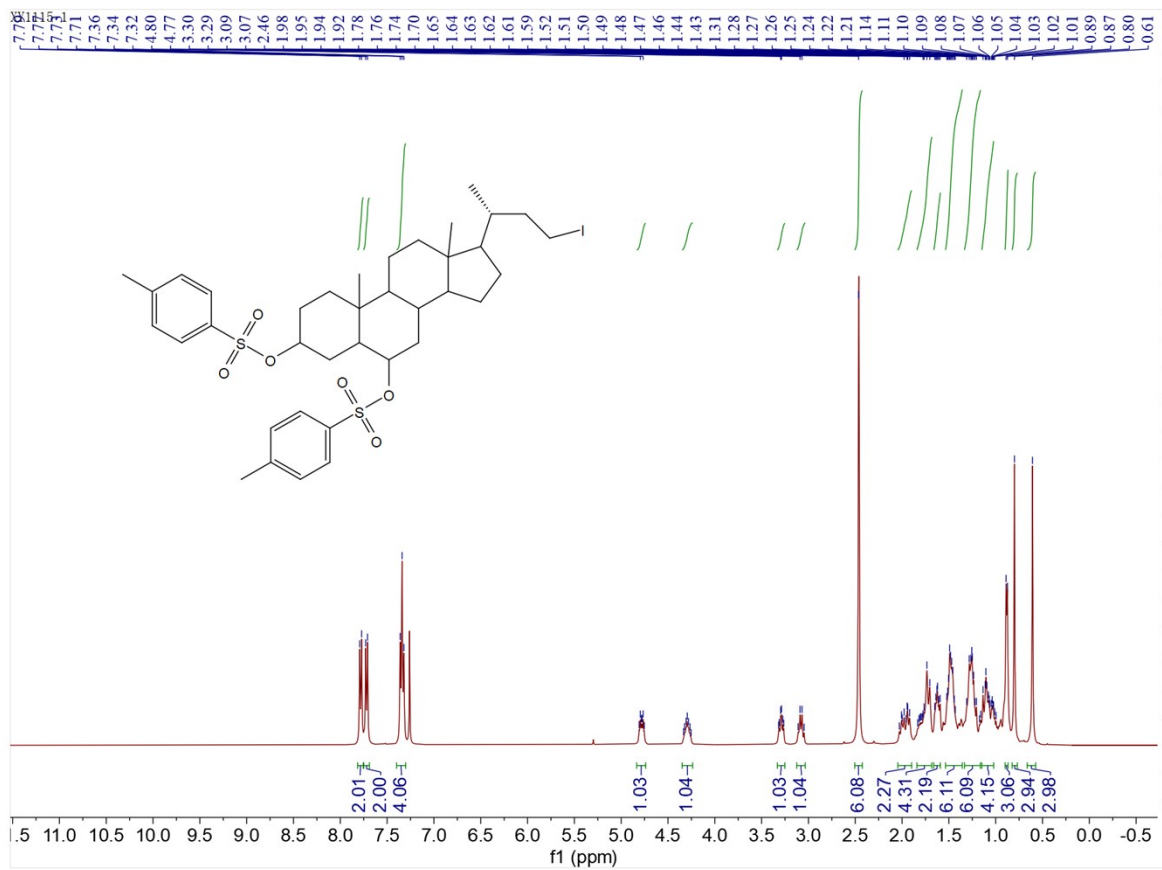

### <sup>13</sup>C NMR of compound 47

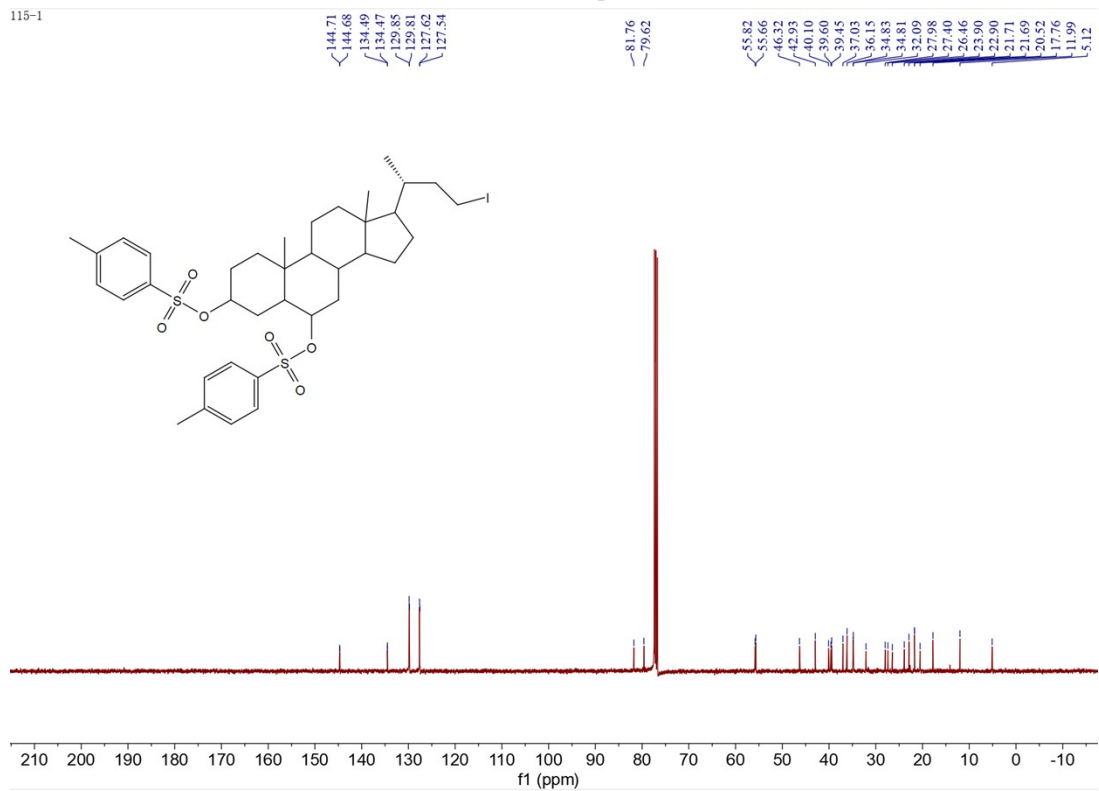

### <sup>1</sup>H NMR of compound 48

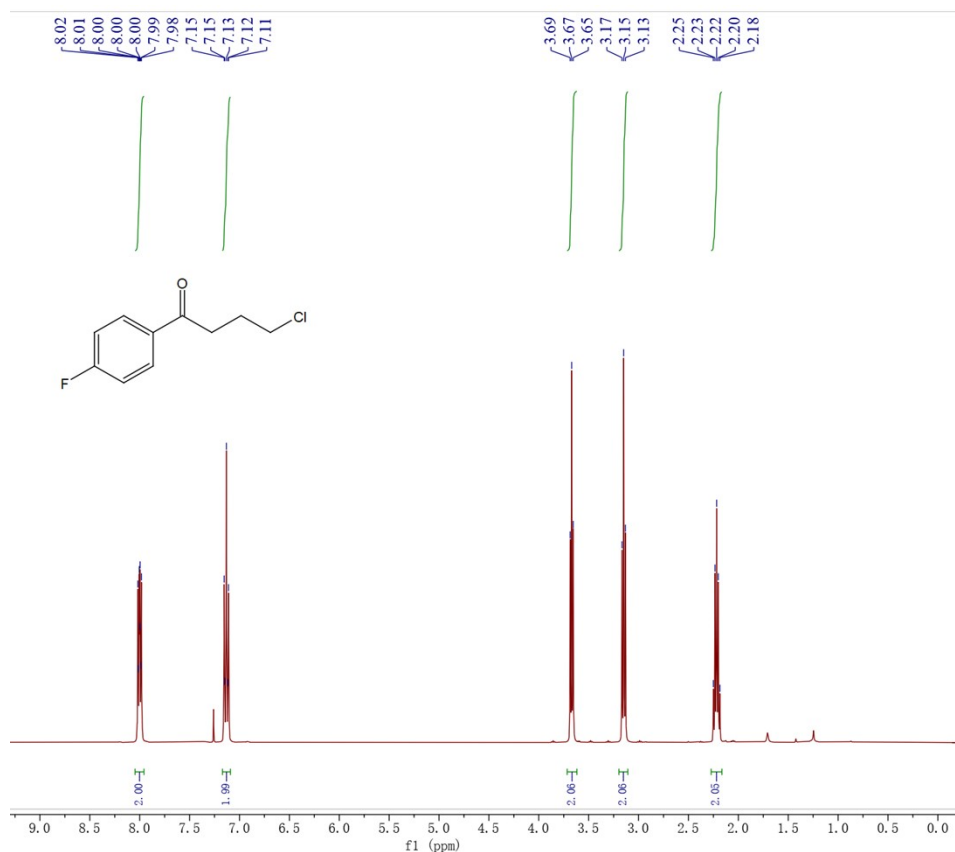

### <sup>13</sup>C NMR of compound 48

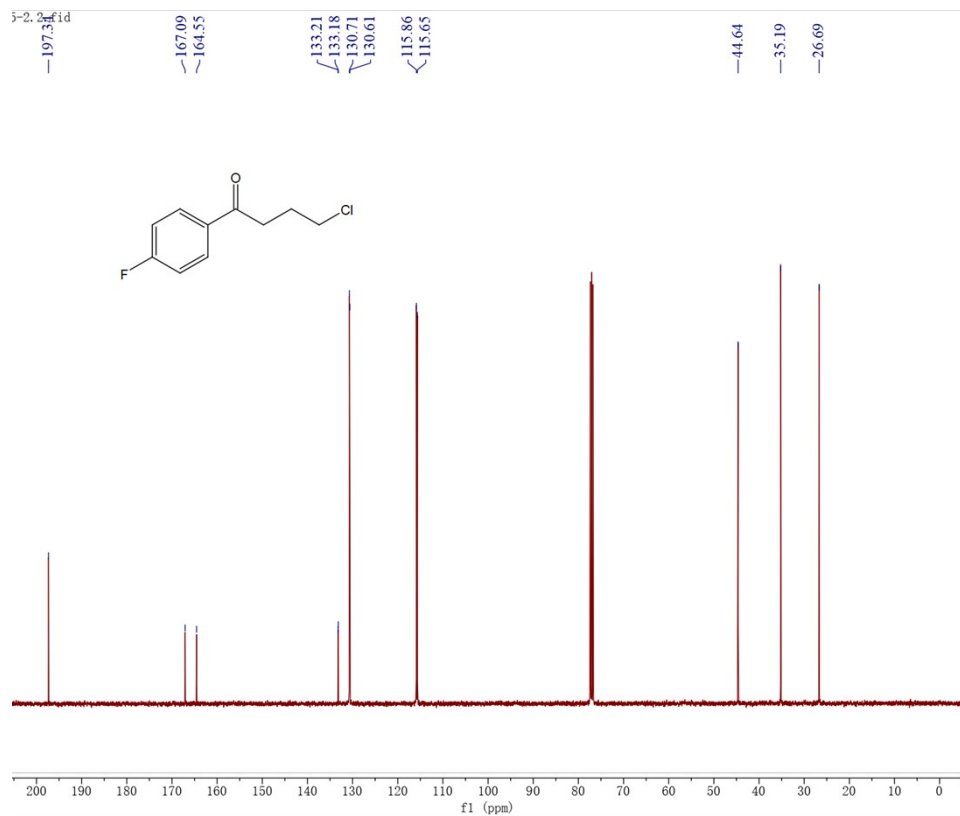

<sup>19</sup>F NMR of compound 48

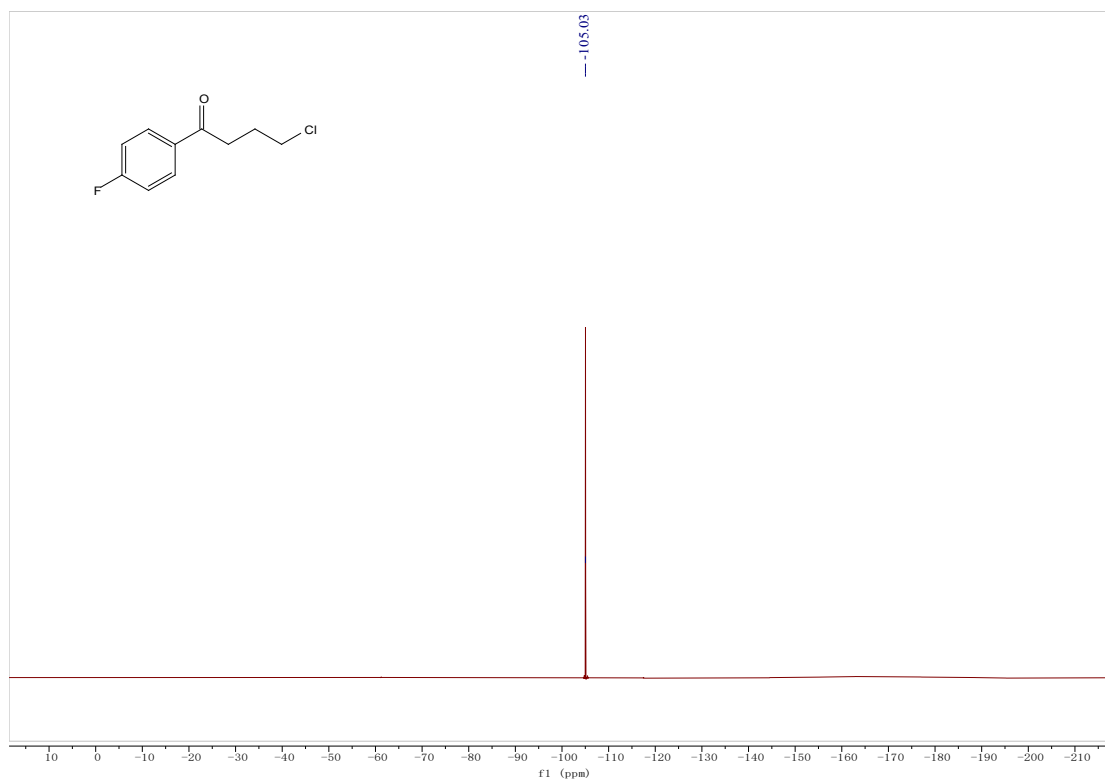

<sup>1</sup>H NMR of compound 49

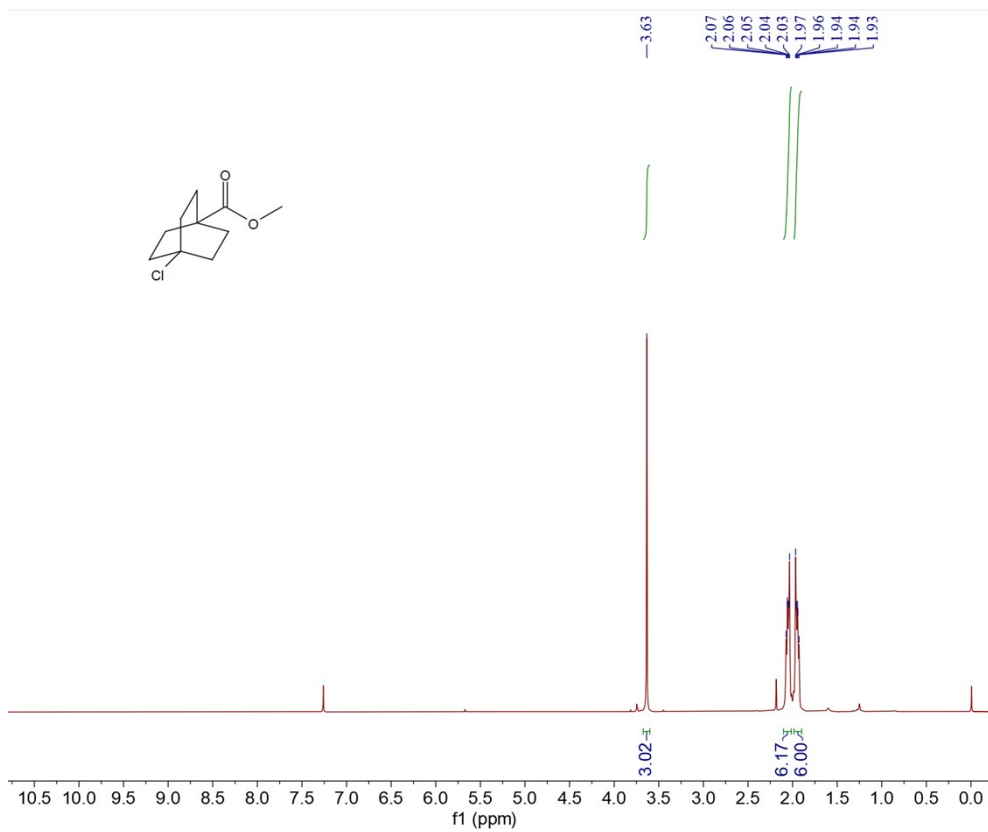

<sup>13</sup>C NMR of compound **49**

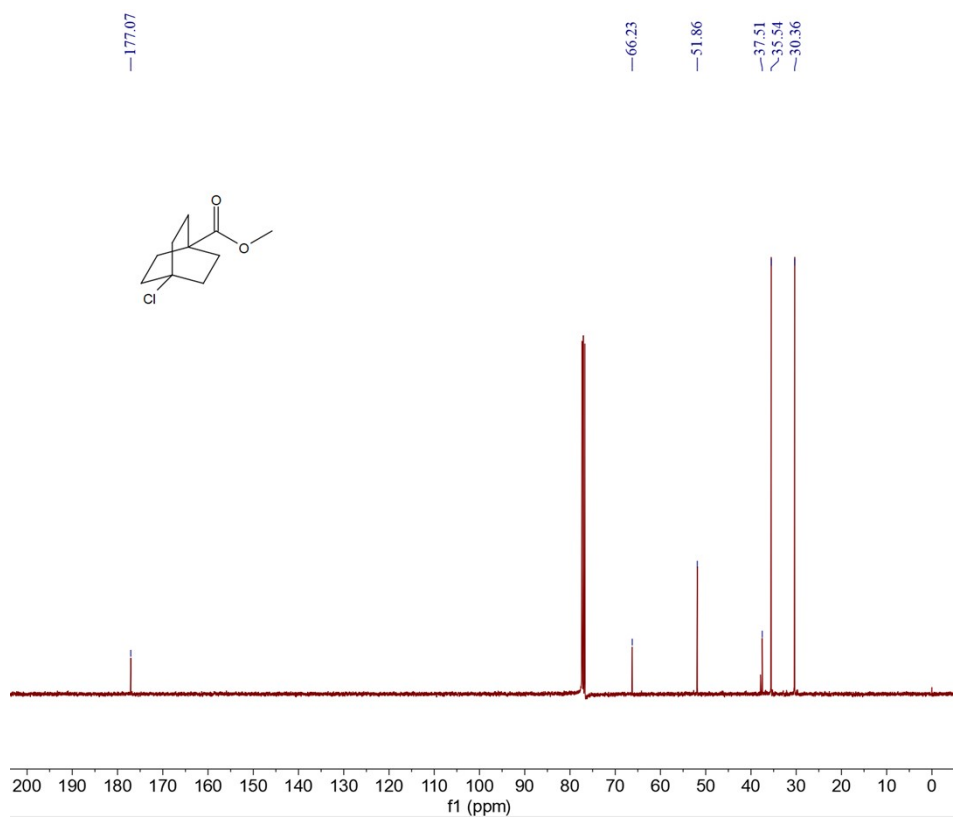

<sup>1</sup>H NMR of compound **50**

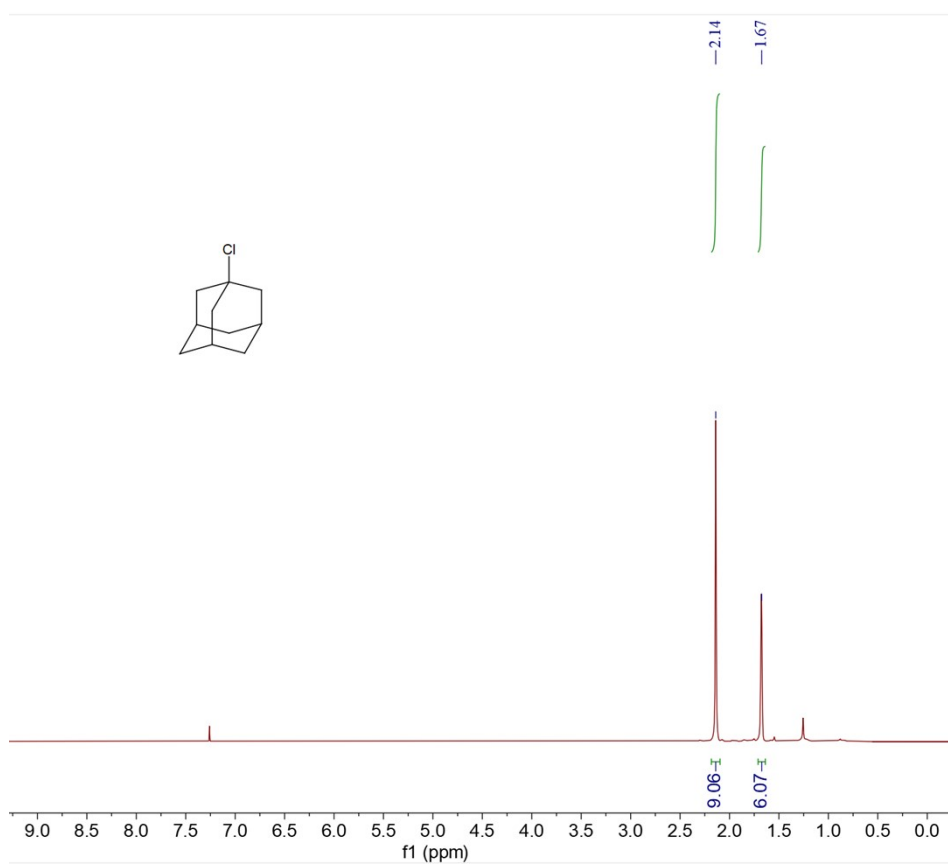

<sup>13</sup>C NMR of compound **50**

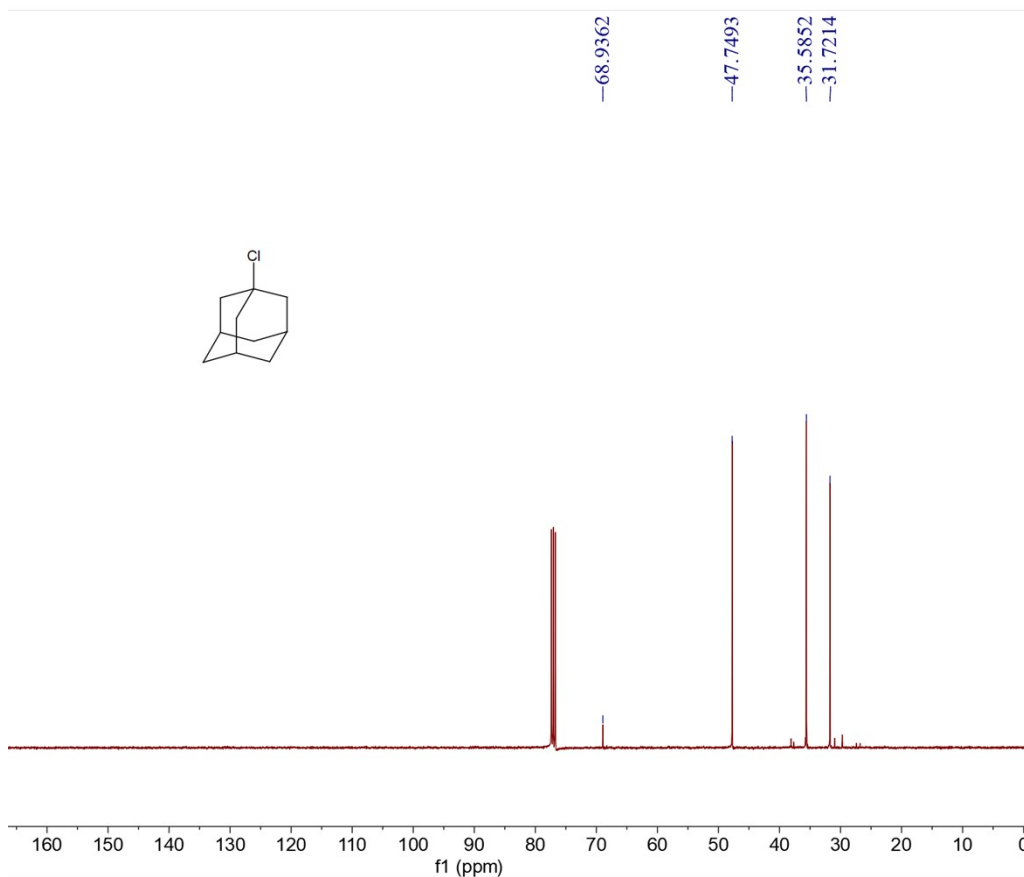

<sup>1</sup>H NMR of compound **51**

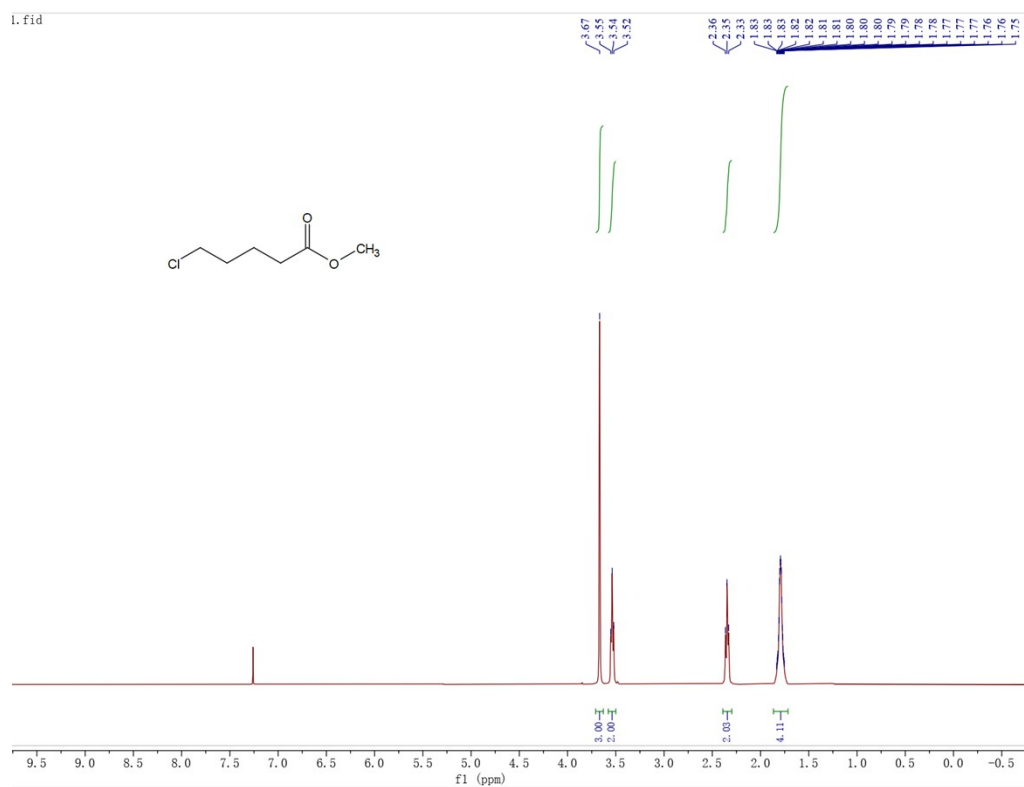

<sup>13</sup>C NMR of compound **51**

1-3.2.fid

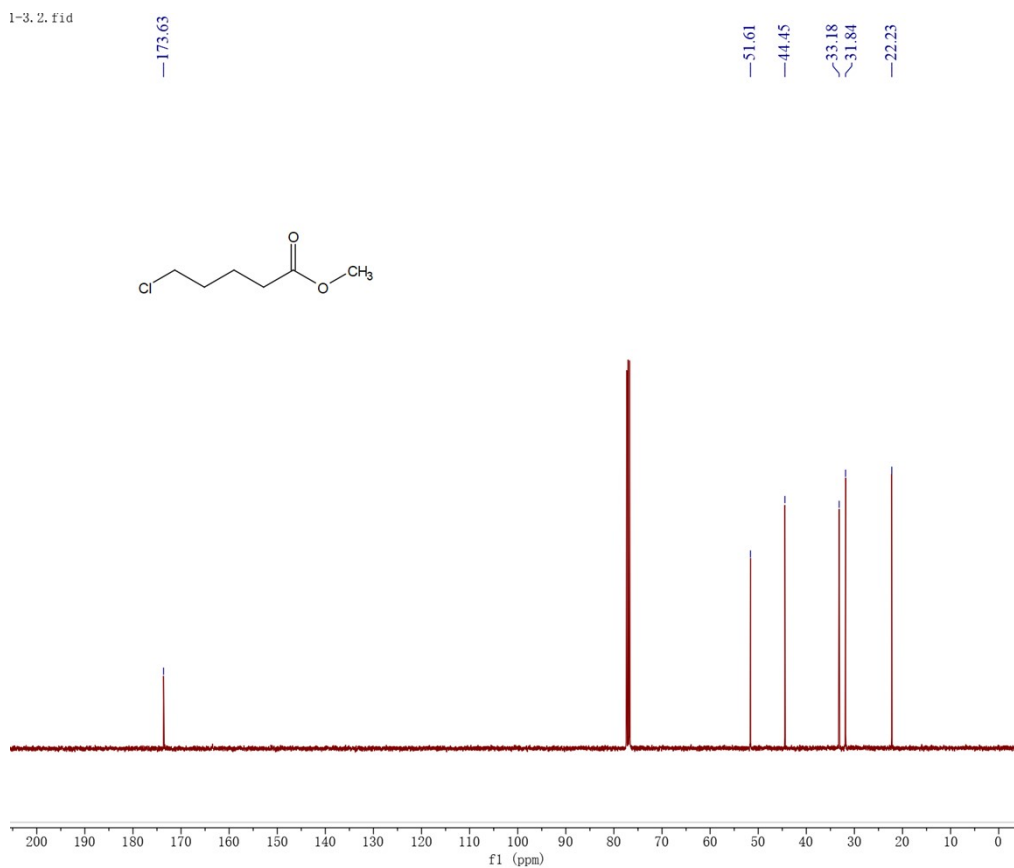

<sup>1</sup>H NMR of compound **52**

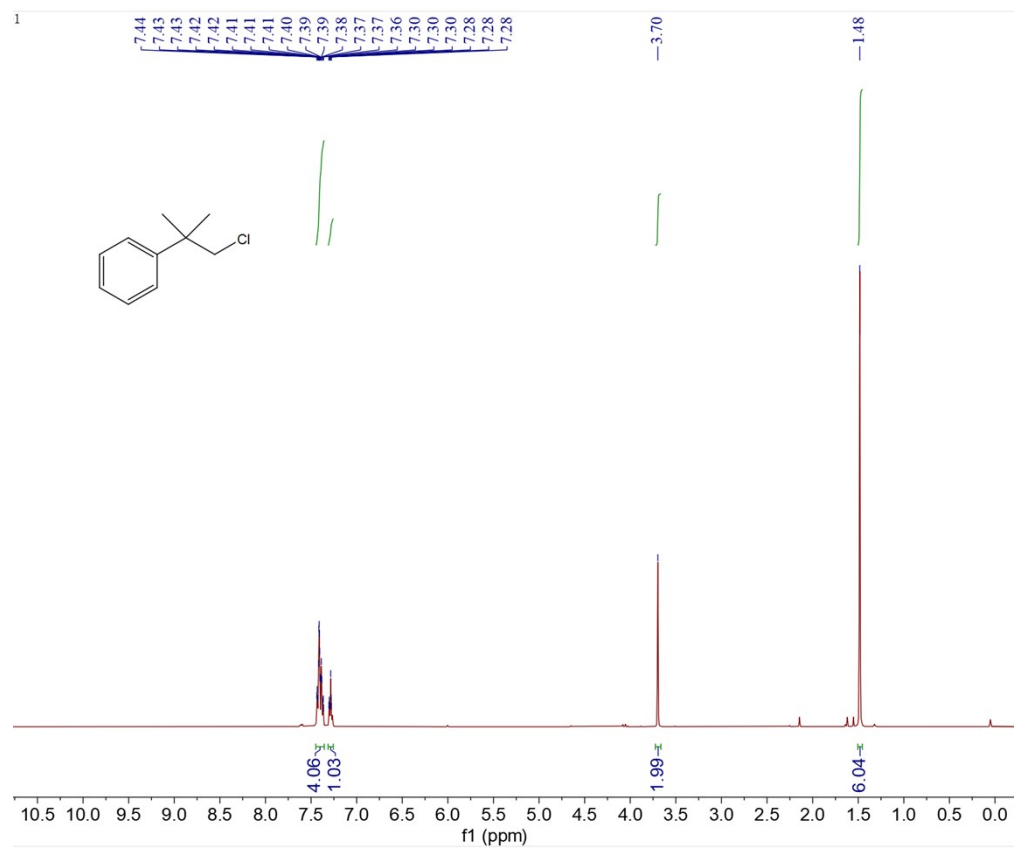

### <sup>13</sup>C NMR of compound 52

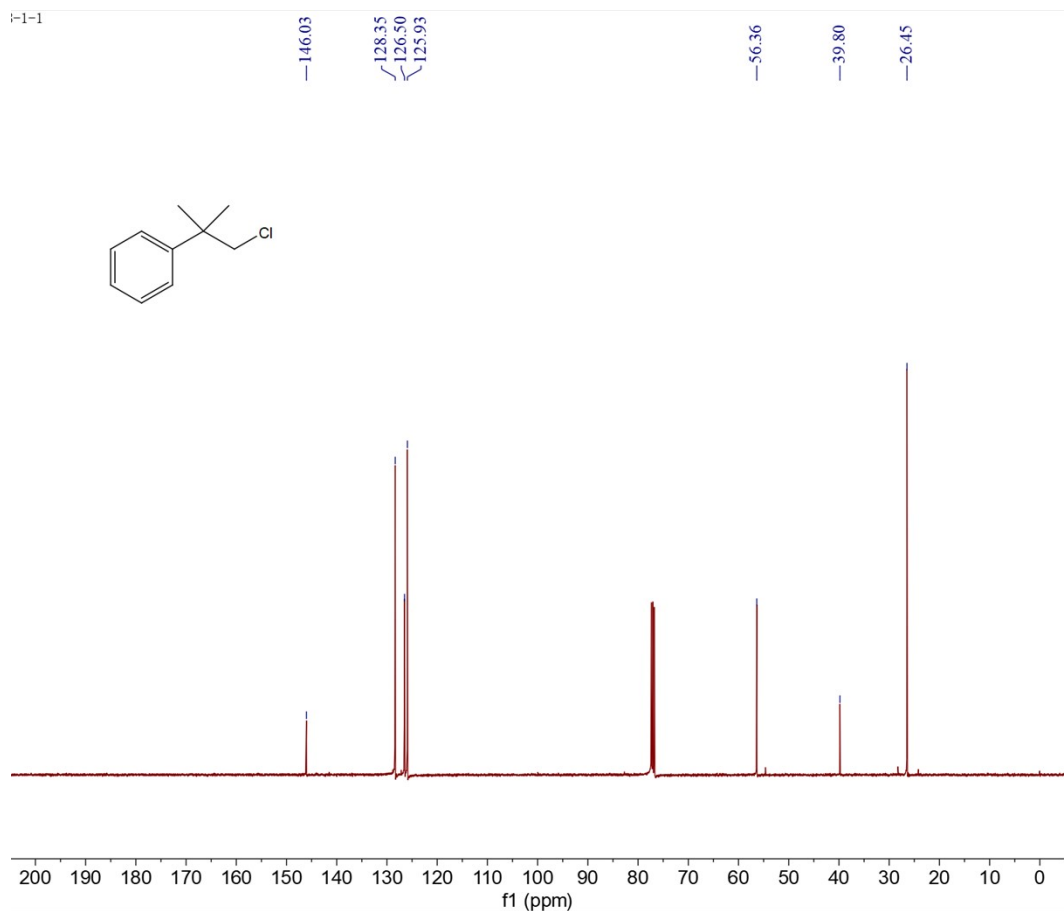

### <sup>1</sup>H NMR of compound 53

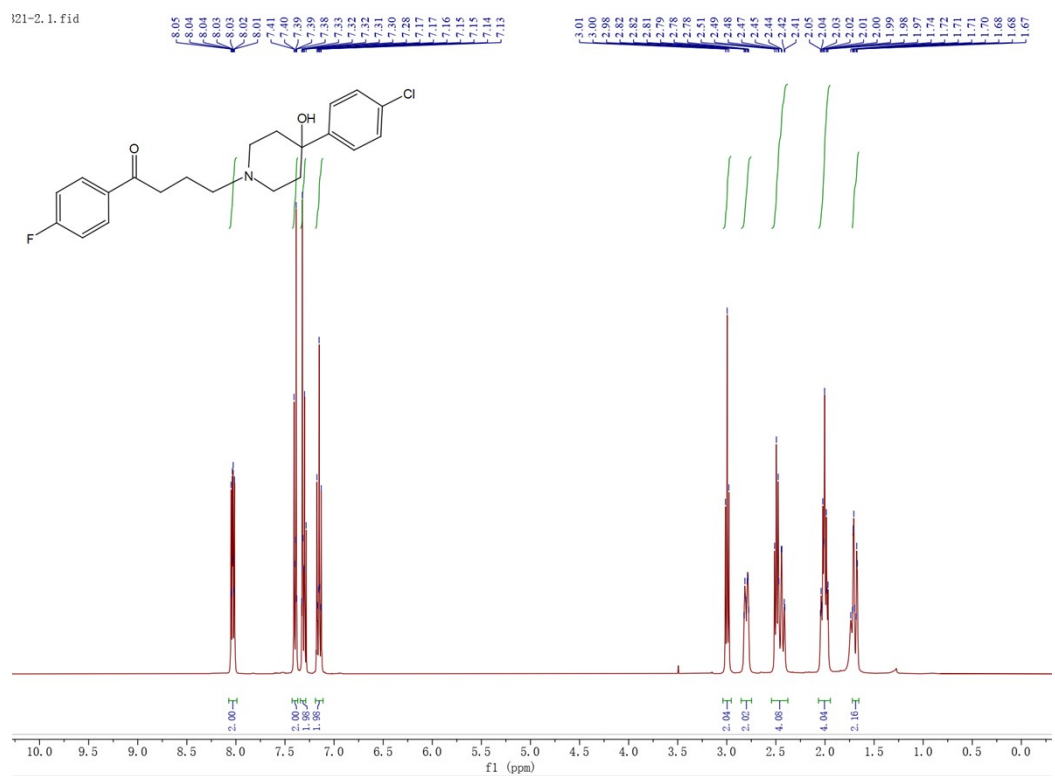

### <sup>13</sup>C NMR of compound 53

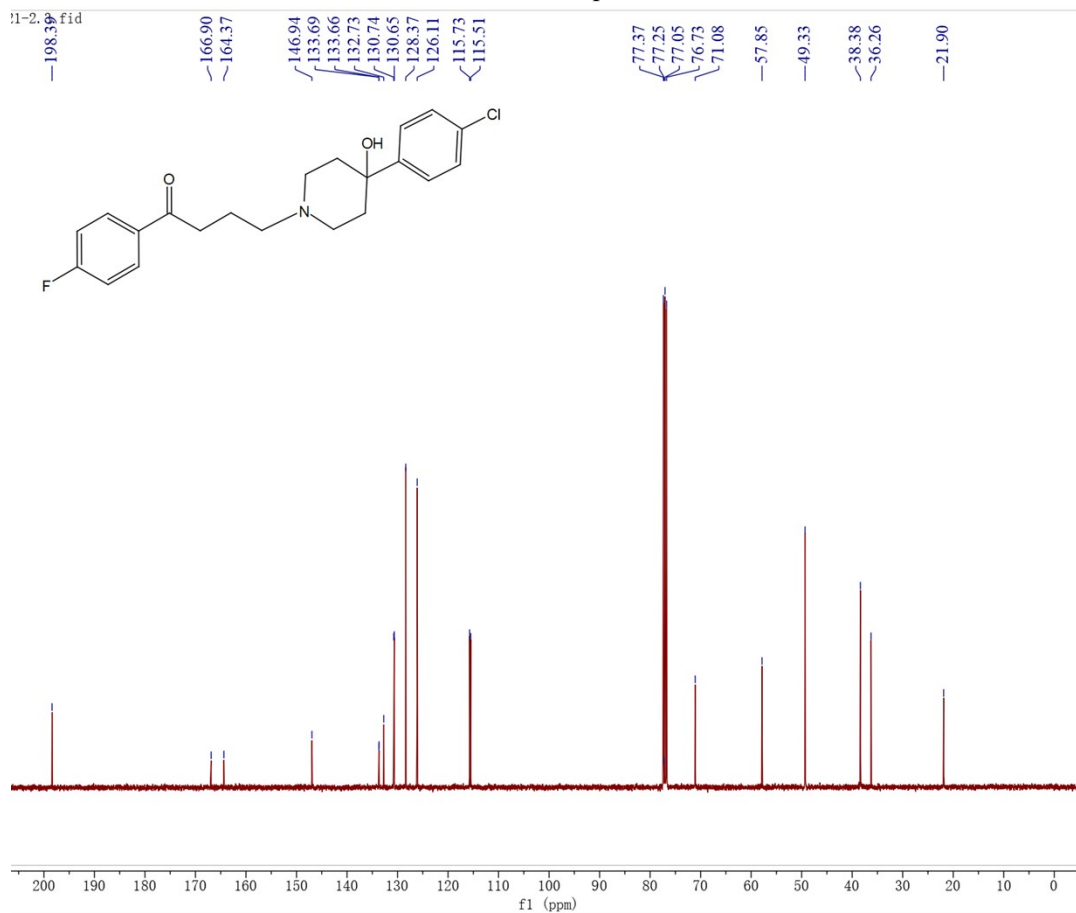

### <sup>19</sup>F NMR of compound 53

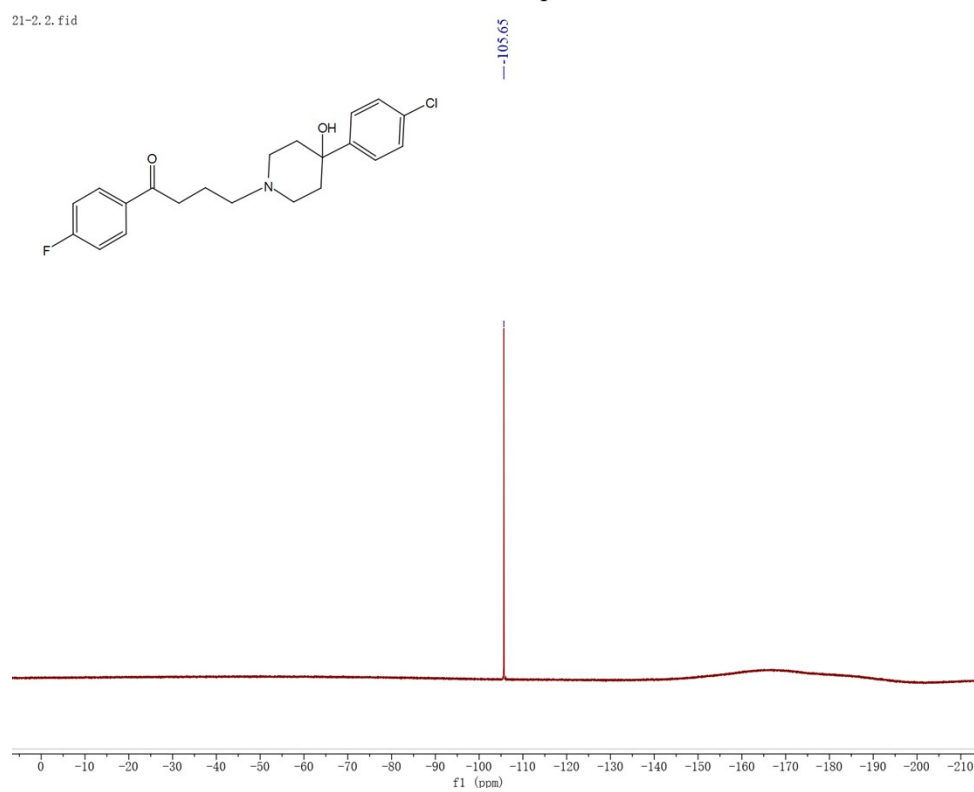



### <sup>1</sup>H NMR of compound 54

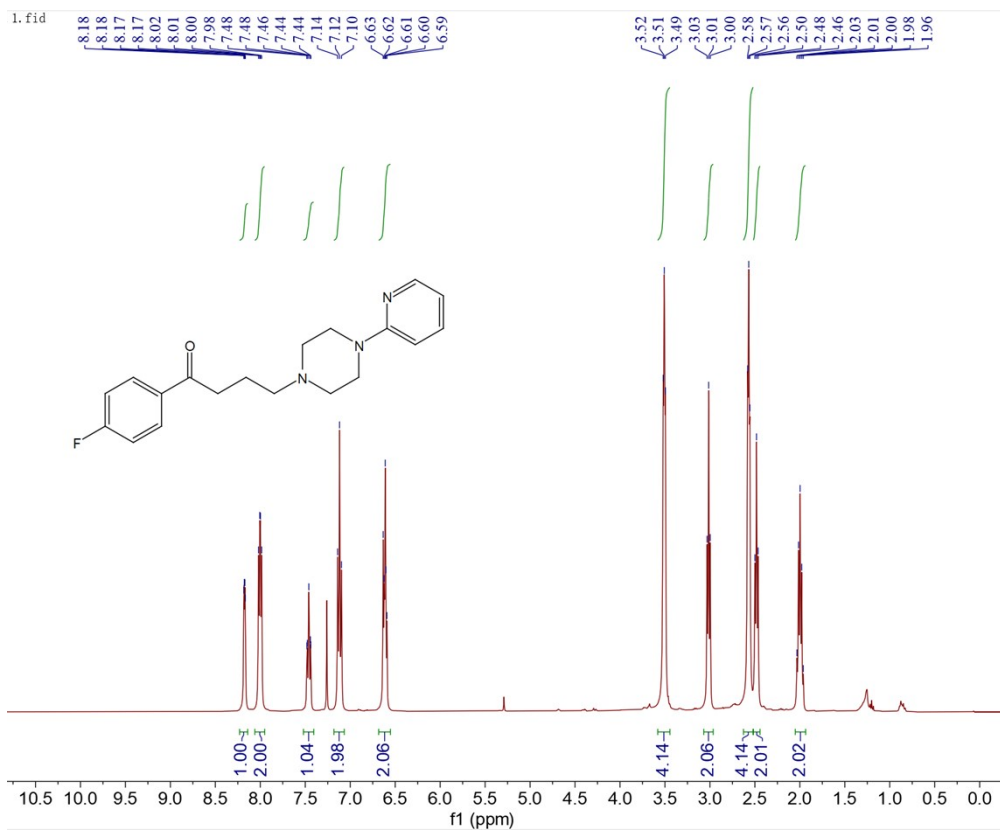

### <sup>13</sup>C NMR of compound 54

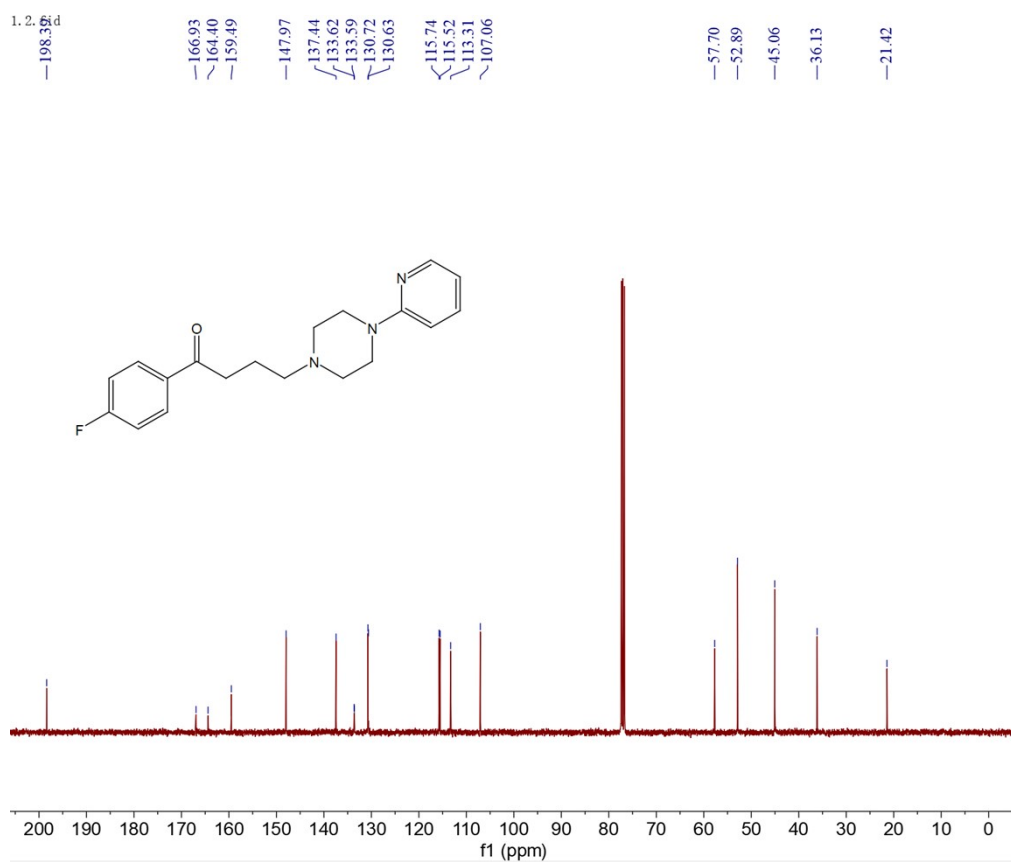

<sup>19</sup>F NMR of compound **54**

l. 3. fid

-105.58

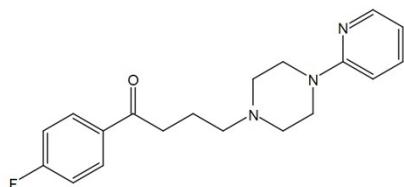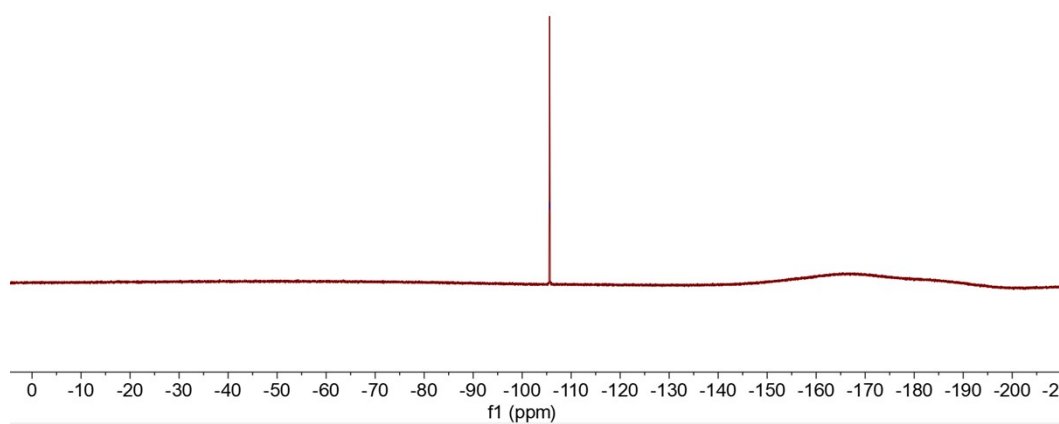

Supplement: d3gc02063k1.pdf [file d3gc02063k1.pdf]
